# Supplementary material for: LKB1/ STK11 Is a Tumor Suppressor in the Progression of Myeloproliferative Neoplasms
Source: Oxford University Press journal article supplement (doi:10.1158/2159-8290.cd-20-1353), 2021-02-12
Supplement: cd-20-1353_table_s5_suppst5.xlsx [file cd-20-1353_table_s5_suppst5.xlsx]

## Sheet: Sheet1
	Case	Diagnosis (Age in years)	Age at Transformation	Time to Transformation	Gender	Gene Mutations					IHC (Fig 4)	qPCR (Fig S8)	RNA-seq (Fig 4, Fig S9)	Xenotransplantation (Fig S5)	Drug treatments (Fig 4)
						Gene	Nucleotide Change	Amino Acid Change	Chronic MPN VAF%	Blast VAF%
	M-439	ET (24) PTMM (42)	44	ET/PTMM: 18 years PTMM/AML: 24 months	F	JAK2	c.1849G>T	V617F	0.43	0.58		YES (Patient 1)			YES
						TET2	c.3202C>A	Q1068K	0	0.166667
	M-575	PV (63)	73	PV/PPMM: 6 years	M	JAK2	c.1849G>T	V617F	0.78	0.99		YES (Patient 2)
		PPMM (69)		PPMM/AML: 4 years
	M-1917	PMF (71)	74	3 years	M	ASXL1	c.1934dup	G646Wfs*12	0.14	0.41		YES (Patient 3)			YES
						MPL	c.1544G>T	W515L	0.64	0.59
						PTPN11	c.1530G>C	Q510H	0.36	0.47
						SRSF2	c.284C>A	P95H	0.54	0.48
						SUZ12	c.459G>T	L153F	0	0.12263
						TET2	c.4380del	V1461Sfs*9	0.52	0.51
	M-1738	PMF (52)	55	46 months	M	ASXL1	c.1934dup	G646Wfs*12	0.26	0.344988	YES	YES (Patient 4)			YES
						JAK2	c.1849G>T	V617F	0.5	0.557522
						NRAS	c.34G>A	G12S	0.48	0.369993
						U2AF1	c.101C>T	S34F	0.52	0.495063
	M-1329	PMF (64)	66	17 months	F	ASXL1	c.1934dup	G646Wfs*12	0	0.150855	YES
						DNMT3A	c.1097G>A	R366H	0	0.412611
						EZH2	c.2225T>C	V742A	0	0.238223
						JAK2	c.1849G>T	V617F	0.79	0.145822
						SH2B3	c.1038dup	L347Afs*38	0.07	0.359922
						SH2B3	c.1236+2T>G	SPLICE REGION	0	0.130435
						SH2B3	c.1566dup	E523Rfs*23	0	0.152932
						TET2	c.1965dup	P656Tfs*25	0.09	0.389778
						TET2	c.664_665dupCA	G223Mfs*28	0	0.135922
	M-224	PMF (52)	61	9 years	M	ASXL1	c.3111G>A	W1037*	0.436	0		YES (Patient 5)
						CALR	c.1099_1150del	L367fs*46	0.23	0.23
						SH2B3	c.1243C>T	R415C	0	0.4
						TP53	c.766delA	T256Hfs*89	0	0.67
	M-059	PV (79)	87	8.6 years	M	JAK2	c.1849G>T	V617F	0.7	0.4013	YES
						PTPN11	c.215C>T	A72V	0	0.299699
						RUNX1	c.1242C>A	Y414*	0.09	0
						RUNX1	c.509-2A>G	SPLICE REGION	0	0.386905
						SRSF2	c.284C>T	P95L	0.46	0.392185
	M-2089	PMF (71)	81	9.6 years	M	DNMT3B	c.2230A>G	R744G	0.17	0	YES	YES (Patient 6)
						JAK2	c.1849G>T	V617F	0.5	0.614319
						TP53	c.734G>A	G245D	0	0.995923
						U2AF1	c.472_477dup	Y158_E159dup	0.31	0
	M-558	ET (43) PTMM (57)	59	ET/PTMM: 14 years PTMM/AML: 18 months	F	CALR	c.1090_1123del34	E364Nfs*55	0.216033	0.96		YES (Patient 7)
						SF3B1	c.2098A>G	K700E	0	0.5
	M-1804	PMF (75)	78	36 months	M	JAK2	c.1849G>T	V617F	0.24	NA	YES				YES
						ASXL1	c.1934dup	G646Wfs*12	0.14	NA
						U2AF1	c.470A>C	Q157P	0.23	NA
	5044293	PTMM (73)	NT	NT	F	CALR	c.1092_1143del52	L367Tfs*46	0.3	NA				YES
						ASXL1	NA	P853Rfs*14	0.37	NA
	300179	MDS/MPN (46)	NT	NT	F	JAK2	c.1849G>T	V617F	0.84	NA				YES
						TP53	c.736A>G	M246V	0.79	NA
						DNMT3A	c.920C>T	P307L	0.47	NA
						TET2	c.5885C>T	P1962L	0.46	NA
	585953	PPMM (71)	NT	NT	F	JAK2	c.1849G>T	V617F	0.64	NA				YES
						TET2	c.340C>T	Q114*	0.5	NA
	16345	PMF (47)	55	7.9 years	M	CALR	c.1154_1155insTTGTC	p.K385fs*47	0.204	0.231			YES
						ASXL1	c.2149_2155delAGGAGAG	p.R718fs*5	0.01	0.104
						RUNX1	c.168_169insG	p.P57fs*81	0.017	0.017
	46567	PMF (51)	57	6 years	M	CALR	c.1154_1155insTTGTC	p.K385fs*47	0.397	0.47			YES
						ASXL1	c.2081_2087delCACAACT	p.T694fs*7	0.406	0.416
						TET2	c.2087delC	p.P697fs*3	0.435	0.441
	56293	PMF (77)	78	14 months	M	JAK2	c.1849G>T	V617F	NA	0.418			YES
						IDH2	c.419G>A	p.R140Q	NA	0.394
						SRSF2	c.284C>G	p.P95R	NA	0.475
						RUNX1	c.1175_1176insA	p.G394fs*206	NA	0.364
	63552	PMF (52)	65	12.4 years	M	CALR	c.1154_1155insTTGTC	p.K385fs*47	0.305	0.37			YES
						ASXL1	c.2113G>T	p.E705*	0.128	0.012
						ASXL1	c.2422delC	p.P808fs*10	0.211	0.374
						IDH1	c.394C>T	p.R132C	0.009	0.371
	2456	PMF (65)	67	2.2 years	M	CALR	c.1154_1155insTTGTC	p.K385fs*47	0.251	0.425			YES
						ASXL1	c.1771_1772insA	p.Y591fs*1	0.319	0.376
						RUNX1	c.281_282insAG	p.S94fs*29	0.328	0.429
						SRSF2	c.284C>A	p.P95H	0.41	0.493
	29485	PMF (78)	83	5 years	F	JAK2	c.1849G>T	V617F	0.22	0			YES
						ASXL1	c.1900_1901delAG	p.E635fs*22	0.29	0.49
						CBL	c.1169A>T	p.D390V	0.02	0.87
						EZH2	c.2022G>C	p.L674F	0	0.05
						EZH2	c.2197T>C	p.Y733H	0	0.12
						SETBP1	c.2602G>A	p.D868N	0	0.3
						SETBP1	c.2606G>A	p.S869N	0	0.11
						TERT	c.3271C>T	p.P1091S	0.29	0
	44786	PMF (72)	74	2 years	M	JAK2	c.1849G>T	V617F	0.83	NA			YES
						SRSF2	c.284C>A	P95H	0.5	NA
						IDH2	c.419G>A	p.R140Q	0.46	NA
	52749	PMF (72)	75	3 years	M	JAK2	c.1849G>T	V617F	0.88	0.92			YES
						ASXL1	c.2593G>T	p.E865*	0.42	0.47
						EZH2	c.2029+3A>G	NA	0.8	0.89
						FAT1	c.13645G>A	p.V4549M	0	0.63
						TET2	c.5620G>T	p.E1874*	0	0.07
						TP53	c.743G>A	p.R248Q	0.8	0.89
	54910	PMF (60)	62	2 years	M	JAK2	c.1849G>T	V617F	0.12	0.35			YES
						RUNX1	c.319C>T	p.R107C	0.03	0.15
						SH2B3	c.1481C>G	p.S494*	0.49	0.49
						ARID2	c.64G>T	p.E22*	0.06	0.18
	56590	PMF (44)	57	13 years	F	JAK2	c.1849G>T	V617F	0.37	NA			YES
						TP53	c.743G>A	p.R248Q	0.33	NA
	56932	PMF (78)	79	12 months	M	NA	NA	NA	NA	NA			YES
	A1088	PMF (63)	70	7 years	M	JAK2	c.1849G>T	p.V617F	NA	0.9					YES
						RUNX1	c.318G>A	p.W106*	NA	0.48
						RUNX1	c.1295dupG	p.C432fs	NA	0.12
						IDH1	c.395G>A	p.R132H	NA	0.35
						SRSF2	c.284C>A	p.P95H	NA	0.58
	Key: ET = essential thrombocythemia; PMF = primary myelofibrosis; PTMM = post-thrombocythaemic myelofibrosis; PPMM = post-polycythaemic myelofibrosis; AML = acute myeloid leukemia; VAF% = variant allele frequency; MPN = myeloproliferative neoplasm; **NT = did not transform NA = Not available
	Table S5: Patient information
