# Supplementary material for: LKB1/ STK11 Is a Tumor Suppressor in the Progression of Myeloproliferative Neoplasms
Source: Oxford University Press journal article supplement (doi:10.1158/2159-8290.cd-20-1353), 2021-02-12
Supplement: cd-20-1353_table_s6_suppst6.xlsx [file cd-20-1353_table_s6_suppst6.xlsx]

## Sheet: Table S6
Table S6: GSEA pathways comparison between the mouse RNA-seq data (MPLW515L vs MPLW515L Stk11 -/-) and the Human RNA-seq data (chronic phase MPN vs blast phase MPN)
GeneSet	NES_hs	pval_hs	qval_hs	NES_mm	pval_mm	qval_mm
GENELIST_WIERENGA_ETAL2014_HIF2UP_3FC	1.07512	0.207921	0.652242	-1.33208	0	0.62849
GENELIST_WIERENGA_ETAL2014_HYPOXIA_3FC	1.59537	0.00397614	0.475892	-1.26665	0.0929487	0.538524
GENELIST_WIERENGA_ETAL2014_HIF1UP_3FC	1.371	0.00377358	0.259922	-1.16437	0.0945674	0.794007
HECKER_IFNB1_TARGETS	-2.75665	0	0	-2.0566	0	7.15728e-05
REACTOME_FORMATION_OF_FIBRIN_CLOT_CLOTTING_CASCADE	0.833967	0.727092	1	-2.02512	0	0.000105186
GSE11057_PBMC_VS_MEM_CD4_TCELL_UP	-3.04612	0	0	-1.97832	0	0.000309535
BIOCARTA_INTRINSIC_PATHWAY	-1.06636	0.370833	0.523032	-1.96055	0	0.000505991
TAKEDA_TARGETS_OF_NUP98_HOXA9_FUSION_8D_DN	-2.7269	0	0	-1.95293	0	0.000546221
MODULE_263	-2.18305	0	7.24538e-05	-1.9429	0	0.000682649
JAATINEN_HEMATOPOIETIC_STEM_CELL_DN	-3.70619	0	0	-1.9413	0	0.000686452
WANG_IMMORTALIZED_BY_HOXA9_AND_MEIS1_UP	-1.50452	0.037694	0.0824044	-1.93901	0	0.000705619
GO_PLATELET_ALPHA_GRANULE	1.12457	0.232824	0.630466	-1.93075	0	0.000924772
GO_NEGATIVE_REGULATION_OF_AMINE_TRANSPORT	1.51186	0.0457143	0.218081	-1.9292	0	0.000939443
BOSCO_INTERFERON_INDUCED_ANTIVIRAL_MODULE	-2.77079	0	0	-1.92843	0	0.000953517
GNF2_SPI1	-2.60706	0	0	-1.92574	0	0.000967252
GSE24634_TREG_VS_TCONV_POST_DAY3_IL4_CONVERSION_DN	-2.44461	0	0	-1.91425	0	0.0012977
GO_ION_ANTIPORTER_ACTIVITY	-1.4046	0.0362473	0.13297	-1.90607	0	0.00160368
GO_PLATELET_ALPHA_GRANULE_LUMEN	0.890466	0.657841	1	-1.89552	0	0.00205345
GO_GRANULOCYTE_MIGRATION	-2.20385	0	4.76646e-05	-1.89528	0	0.00202186
REACTOME_INTRINSIC_PATHWAY	0.778034	0.773622	1	-1.89272	0	0.00214007
ALTEMEIER_RESPONSE_TO_LPS_WITH_MECHANICAL_VENTILATION	-2.34872	0	4.16343e-06	-1.89085	0	0.00222822
GSE18791_UNSTIM_VS_NEWCATSLE_VIRUS_DC_10H_DN	-2.59403	0	0	-1.88787	0	0.00240557
BROWN_MYELOID_CELL_DEVELOPMENT_UP	-2.73244	0	0	-1.88536	0	0.00251323
GO_PROTEIN_ACTIVATION_CASCADE	-2.09461	0	0.000299448	-1.88478	0	0.00250283
GO_PLATELET_DEGRANULATION	1.07173	0.306667	0.713892	-1.88381	0	0.00251802
LIAN_NEUTROPHIL_GRANULE_CONSTITUENTS	-1.67956	0.00849257	0.029925	-1.87522	0	0.00296738
GO_VESICLE_LUMEN	-1.1368	0.24031	0.404719	-1.8676	0	0.00355151
HESS_TARGETS_OF_HOXA9_AND_MEIS1_DN	-2.64966	0	0	-1.86749	0	0.00350352
GO_POSITIVE_REGULATION_OF_LEUKOCYTE_MIGRATION	-1.88058	0	0.00578591	-1.86715	0	0.00348067
CHYLA_CBFA2T3_TARGETS_UP	-1.63815	0	0.0387731	-1.86498	0	0.00365836
ICHIBA_GRAFT_VERSUS_HOST_DISEASE_35D_UP	-2.41752	0	0	-1.86396	0	0.00370372
GO_T_TUBULE	-1.08604	0.288172	0.486343	-1.85894	0	0.00419496
GO_BLOOD_COAGULATION_INTRINSIC_PATHWAY	0.700348	0.859259	1	-1.85231	0	0.0048999
LIANG_SILENCED_BY_METHYLATION_2	-1.54001	0.014862	0.068247	-1.84971	0	0.00514013
GO_INORGANIC_ANION_TRANSPORT	-1.3436	0.03125	0.176504	-1.84959	0	0.00509876
GO_SECRETORY_GRANULE_LUMEN	0.830092	0.809709	1	-1.84789	0	0.0051345
BENNETT_SYSTEMIC_LUPUS_ERYTHEMATOSUS	-2.52664	0	0	-1.84583	0	0.00534181
OHGUCHI_LIVER_HNF4A_TARGETS_UP	-1.61801	0.0103734	0.0438954	-1.8407	0	0.00604414
YU_MYC_TARGETS_DN	-2.12073	0	0.000211565	-1.83951	0	0.00608877
GO_CHLORIDE_TRANSPORT	-1.28224	0.0882353	0.227078	-1.83907	0	0.00604908
GO_BLOOD_COAGULATION_FIBRIN_CLOT_FORMATION	0.885242	0.635815	1	-1.83751	0	0.00624664
SANA_TNF_SIGNALING_UP	-2.1587	0	0.00010852	-1.83396	0	0.00663269
TERAO_AOX4_TARGETS_SKIN_DN	-1.17963	0.225873	0.344098	-1.83383	0	0.00658831
ONGUSAHA_TP53_TARGETS	0.971304	0.482353	0.888375	-1.83178	0.00121359	0.00687243
GO_POSITIVE_REGULATION_OF_INTERLEUKIN_2_BIOSYNTHETIC_PROCESS	-2.0369	0	0.000829353	-1.82924	0	0.00723876
KAMIKUBO_MYELOID_CEBPA_NETWORK	-1.62108	0.0224949	0.0431689	-1.82829	0.00126103	0.00738363
GSE3565_DUSP1_VS_WT_SPLENOCYTES_UP	-2.4249	0	0	-1.82624	0	0.0075157
GO_REGULATION_OF_MONONUCLEAR_CELL_MIGRATION	-1.87028	0	0.00637224	-1.82397	0	0.00776858
GSE29618_MONOCYTE_VS_PDC_UP	-2.96143	0	0	-1.82236	0	0.00797846
GO_POSITIVE_REGULATION_OF_MACROPHAGE_CHEMOTAXIS	-1.70776	0.00816326	0.0247357	-1.81945	0	0.00848184
GO_CALCIUM_INDEPENDENT_CELL_CELL_ADHESION_VIA_PLASMA_MEMBRANE_CELL_ADHESION_MOLECULES	1.43463	0.0592885	0.289987	-1.81867	0	0.0085233
RAGHAVACHARI_PLATELET_SPECIFIC_GENES	1.38464	0.057732	0.333779	-1.81767	0	0.00860991
GSE4748_CYANOBACTERIUM_LPSLIKE_VS_LPS_AND_CYANOBACTERIUM_LPSLIKE_STIM_DC_3H_DN	-1.95044	0	0.00270858	-1.81579	0	0.00895625
GO_MEMBRANE_DEPOLARIZATION_DURING_CARDIAC_MUSCLE_CELL_ACTION_POTENTIAL	-1.10705	0.337474	0.450947	-1.81305	0	0.00936733
MARKEY_RB1_ACUTE_LOF_DN	-2.44277	0	0	-1.81191	0	0.00945165
PID_INTEGRIN2_PATHWAY	-1.62487	0.012848	0.0421078	-1.80926	0	0.00994639
GO_CELLULAR_RESPONSE_TO_INTERFERON_GAMMA	-2.11665	0	0.000221052	-1.80913	0	0.00988451
MODULE_108	-2.2454	0	2.09788e-05	-1.8074	0	0.0101849
STEARMAN_TUMOR_FIELD_EFFECT_UP	-1.67653	0.00425532	0.0305621	-1.80261	0	0.0112716
KEGG_COMPLEMENT_AND_COAGULATION_CASCADES	-1.49947	0.0100402	0.0846588	-1.80049	0	0.0116966
GSE10325_LUPUS_CD4_TCELL_VS_LUPUS_MYELOID_DN	-3.2887	0	0	-1.79928	0	0.0118796
DEMAGALHAES_AGING_UP	-1.66421	0.00207039	0.0331173	-1.79919	0	0.0117861
GSE19888_ADENOSINE_A3R_INH_PRETREAT_AND_ACT_BY_A3R_VS_TCELL_MEMBRANES_ACT_MAST_CELL_UP	-2.80629	0	0	-1.79793	0	0.011965
GO_LEUKOCYTE_MIGRATION_INVOLVED_IN_INFLAMMATORY_RESPONSE	-1.75243	0.00608519	0.0177234	-1.79623	0	0.0123027
DELPUECH_FOXO3_TARGETS_UP	-1.35606	0.0590631	0.16687	-1.79612	0	0.0122241
HALLMARK_INTERFERON_GAMMA_RESPONSE	-2.7851	0	0	-1.7944	0	0.0125459
MODULE_345	-2.67897	0	0	-1.79266	0	0.0128226
GO_NEUROTRANSMITTER_BIOSYNTHETIC_PROCESS	-1.48396	0.0688259	0.0919466	-1.79251	0	0.0127416
GO_BICARBONATE_TRANSMEMBRANE_TRANSPORTER_ACTIVITY	-1.40229	0.0775681	0.134455	-1.79249	0	0.0126385
MODULE_76	-2.52016	0	0	-1.79003	0	0.0130842
GO_REGULATION_OF_LEUKOCYTE_MIGRATION	-1.99213	0	0.00160703	-1.78718	0	0.0137594
ROSS_AML_WITH_CBFB_MYH11_FUSION	-2.74531	0	0	-1.78615	0	0.0138927
VERHAAK_AML_WITH_NPM1_MUTATED_DN	1.60635	0	0.145431	-1.78603	0	0.0137984
GO_REGULATION_OF_NF_KAPPAB_IMPORT_INTO_NUCLEUS	-1.87588	0	0.00601661	-1.78428	0.00116009	0.0142347
GO_INFLAMMATORY_RESPONSE	-2.47579	0	0	-1.78347	0	0.0142647
GO_ADAPTIVE_IMMUNE_RESPONSE_BASED_ON_SOMATIC_RECOMBINATION_OF_IMMUNE_RECEPTORS_BUILT_FROM_IMMUNOGLOBULIN_SUPERFAMILY_DOMAINS	-2.71969	0	0	-1.78314	0	0.0142868
GSE11057_CD4_CENT_MEM_VS_PBMC_DN	-2.6038	0	0	-1.78248	0	0.0143524
REACTOME_RESPONSE_TO_ELEVATED_PLATELET_CYTOSOLIC_CA2_	1.29324	0.0749507	0.422014	-1.78242	0	0.0142438
GSE18791_CTRL_VS_NEWCASTLE_VIRUS_DC_12H_DN	-2.38517	0	0	-1.78002	0	0.0148881
GO_AMMONIUM_TRANSMEMBRANE_TRANSPORTER_ACTIVITY	-1.2333	0.187879	0.277552	-1.77992	0	0.0148196
GO_BICARBONATE_TRANSPORT	-1.59301	0.0146138	0.0509867	-1.7793	0	0.0149142
ROETH_TERT_TARGETS_UP	-2.10616	0	0.000247734	-1.77662	0	0.0156218
GO_REGULATION_OF_MACROPHAGE_CHEMOTAXIS	-1.62746	0.0226804	0.0413652	-1.77557	0	0.0158403
HALLMARK_COAGULATION	-1.02468	0.410506	0.60544	-1.77553	0	0.0157184
GSE18791_UNSTIM_VS_NEWCATSLE_VIRUS_DC_6H_DN	-2.62362	0	0	-1.77493	0	0.0157689
GO_CHEMOKINE_MEDIATED_SIGNALING_PATHWAY	-2.45265	0	0	-1.77447	0	0.0157849
GO_INORGANIC_ANION_TRANSMEMBRANE_TRANSPORTER_ACTIVITY	-1.16729	0.161034	0.361776	-1.77371	0	0.0158611
GSE13485_DAY3_VS_DAY7_YF17D_VACCINE_PBMC_DN	-2.59077	0	0	-1.77301	0	0.0159496
RPS14_DN.V1_UP	-2.3305	0	3.88503e-06	-1.77118	0	0.0164206
GO_CHEMOKINE_ACTIVITY	-1.83335	0	0.00890819	-1.77077	0	0.0164182
GSE29618_BCELL_VS_MONOCYTE_DAY7_FLU_VACCINE_DN	-2.667	0	0	-1.77034	0	0.0164485
GO_DIGESTIVE_SYSTEM_PROCESS	-0.992686	0.475904	0.674396	-1.76991	0.0011655	0.0164459
TAKEDA_TARGETS_OF_NUP98_HOXA9_FUSION_10D_DN	-2.37505	0	0	-1.76937	0	0.0164368
GO_PLATELET_ACTIVATION	1.07162	0.293173	0.714048	-1.76894	0	0.0164853
GO_CELLULAR_RESPONSE_TO_GLUCAGON_STIMULUS	0.791996	0.805395	1	-1.76853	0	0.0165015
LIM_MAMMARY_LUMINAL_PROGENITOR_UP	-1.60736	0.00590551	0.0468747	-1.76759	0	0.0166938
GO_POSITIVE_REGULATION_OF_INTERLEUKIN_2_PRODUCTION	-1.77379	0.00211864	0.0149676	-1.76719	0	0.0166334
GO_POSITIVE_REGULATION_OF_CYTOKINE_BIOSYNTHETIC_PROCESS	-2.3637	0	0	-1.76707	0	0.016524
GAUSSMANN_MLL_AF4_FUSION_TARGETS_F_UP	-1.11785	0.196787	0.434878	-1.76383	0	0.0174336
GSE13485_DAY1_VS_DAY7_YF17D_VACCINE_PBMC_DN	-2.97854	0	0	-1.76311	0	0.0175715
GO_CGMP_BINDING	1.29105	0.174812	0.424749	-1.76177	0.0012987	0.0178958
BIOCARTA_ACE2_PATHWAY	1.17026	0.268859	0.572225	-1.7611	0.00137363	0.0180709
GO_NEGATIVE_REGULATION_OF_CATECHOLAMINE_SECRETION	1.48898	0.047081	0.239501	-1.76022	0	0.0182796
GO_ANION_CHANNEL_ACTIVITY	1.14895	0.200803	0.59892	-1.75855	0	0.0187895
KEGG_HEMATOPOIETIC_CELL_LINEAGE	-1.97762	0	0.00193643	-1.75814	0	0.0188663
GSE29618_MONOCYTE_VS_MDC_UP	-2.89084	0	0	-1.75792	0	0.0188187
GO_C_C_CHEMOKINE_RECEPTOR_ACTIVITY	-2.24068	0	2.07343e-05	-1.7579	0	0.0187015
GSE3565_CTRL_VS_LPS_INJECTED_SPLENOCYTES_UP	-2.42316	0	0	-1.75754	0	0.0187659
GNF2_IGF1	0.636277	0.947162	1	-1.75638	0.00133156	0.0189387
GSE21360_PRIMARY_VS_QUATERNARY_MEMORY_CD8_TCELL_UP	-2.37695	0	0	-1.7558	0	0.0190351
MODULE_218	0.662844	0.929791	1	-1.75528	0	0.0191075
GO_POSITIVE_REGULATION_OF_LEUKOCYTE_CHEMOTAXIS	-1.84611	0	0.00799326	-1.75235	0	0.0202543
BOYLAN_MULTIPLE_MYELOMA_PCA1_UP	-2.17543	0	7.582e-05	-1.75206	0	0.020245
GSE24634_IL4_VS_CTRL_TREATED_NAIVE_CD4_TCELL_DAY3_DN	-2.82616	0	0	-1.75202	0	0.0201241
REACTOME_PLATELET_ADHESION_TO_EXPOSED_COLLAGEN	0.862372	0.621849	1	-1.75167	0.00271003	0.0201378
MOSERLE_IFNA_RESPONSE	-2.61394	0	0	-1.75141	0	0.0201902
WIERENGA_STAT5A_TARGETS_DN	1.23627	0.0607287	0.480065	-1.7501	0	0.0205653
GO_CATION_CATION_ANTIPORTER_ACTIVITY	-1.1939	0.225738	0.32426	-1.7469	0	0.0217263
MODULE_170	-2.36776	0	0	-1.74647	0	0.0217625
GSE6269_HEALTHY_VS_STAPH_PNEUMO_INF_PBMC_DN	-2.19444	0	5.67176e-05	-1.74589	0	0.0218686
GO_POSITIVE_REGULATION_OF_POTASSIUM_ION_TRANSMEMBRANE_TRANSPORTER_ACTIVITY	1.48726	0.0640301	0.240654	-1.74422	0.00392157	0.0224604
GO_MEMBRANE_DEPOLARIZATION_DURING_ACTION_POTENTIAL	0.928741	0.605769	0.970102	-1.74368	0.00120482	0.0225395
SEITZ_NEOPLASTIC_TRANSFORMATION_BY_8P_DELETION_UP	-2.23725	0	2.04483e-05	-1.74228	0	0.0230357
GO_RESPONSE_TO_GLUCAGON	0.764205	0.859073	1	-1.74199	0	0.0229949
KUROZUMI_RESPONSE_TO_ONCOCYTIC_VIRUS	-2.53442	0	0	-1.74158	0.00121065	0.0230068
GSE3039_CD4_TCELL_VS_B1_BCELL_DN	-2.01112	0	0.00120874	-1.74021	0	0.0234865
MODULE_171	-2.84375	0	0	-1.74003	0	0.0233972
LEE_LIVER_CANCER_MYC_DN	1.06036	0.326415	0.737454	-1.73887	0	0.0237971
MODULE_247	-1.67422	0.00779727	0.0310451	-1.7388	0.00128205	0.023702
GO_CHLORIDE_CHANNEL_COMPLEX	1.27831	0.121032	0.434494	-1.73837	0	0.0237553
GRANDVAUX_IRF3_TARGETS_UP	-1.82387	0.00425532	0.0097802	-1.73772	0.00133333	0.0238787
FLECHNER_BIOPSY_KIDNEY_TRANSPLANT_REJECTED_VS_OK_UP	-2.74498	0	0	-1.73764	0	0.0237647
GO_RESPONSE_TO_MAGNESIUM_ION	-1.12183	0.284424	0.428293	-1.73738	0	0.0237018
MODULE_292	-2.71551	0	0	-1.73733	0	0.0235949
GO_REGULATION_OF_GRANULOCYTE_CHEMOTAXIS	-1.68338	0.0122449	0.0292105	-1.73649	0	0.0238251
GO_COLLAGEN_BINDING	0.937997	0.564797	0.954227	-1.73637	0	0.0237385
REACTOME_CHEMOKINE_RECEPTORS_BIND_CHEMOKINES	-2.40652	0	0	-1.73511	0	0.0241754
MODULE_128	-2.31499	0	7.47988e-06	-1.73422	0	0.0244375
ESC_V6.5_UP_EARLY.V1_DN	-0.998781	0.460606	0.659811	-1.73418	0	0.0243296
REACTOME_PLATELET_CALCIUM_HOMEOSTASIS	-1.25984	0.203319	0.247953	-1.73292	0.00134771	0.0248428
GO_REGULATION_OF_AMINO_ACID_TRANSPORT	1.04233	0.41791	0.771144	-1.73261	0	0.0248342
GO_REGULATION_OF_LEUKOCYTE_CHEMOTAXIS	-1.89346	0	0.00507821	-1.7318	0.00110988	0.0250967
GSE3982_DC_VS_CENT_MEMORY_CD4_TCELL_UP	-1.86907	0	0.0064345	-1.73067	0	0.0255314
MODULE_436	-2.70134	0	0	-1.73062	0	0.0254253
GO_NEGATIVE_REGULATION_OF_INNATE_IMMUNE_RESPONSE	-1.56044	0.0189474	0.0609544	-1.73015	0.00122699	0.0254654
GSE6269_E_COLI_VS_STREP_PNEUMO_INF_PBMC_DN	-2.0694	0	0.000497789	-1.73012	0	0.025356
QUINTENS_EMBRYONIC_BRAIN_RESPONSE_TO_IR	-1.29231	0.0784753	0.21898	-1.72955	0	0.0254146
COATES_MACROPHAGE_M1_VS_M2_DN	-1.75542	0	0.0172978	-1.72773	0	0.0260993
GO_DETECTION_OF_BIOTIC_STIMULUS	-1.79402	0.00411523	0.0126348	-1.72764	0	0.0260022
REACTOME_TIGHT_JUNCTION_INTERACTIONS	1.13315	0.299424	0.616839	-1.72453	0.0037594	0.0273748
TAKEDA_TARGETS_OF_NUP98_HOXA9_FUSION_3D_DN	-2.05129	0	0.000671615	-1.72407	0	0.0275217
KLEIN_TARGETS_OF_BCR_ABL1_FUSION	-1.58356	0.00833333	0.0540115	-1.72377	0	0.0275452
GO_SULFUR_COMPOUND_TRANSMEMBRANE_TRANSPORTER_ACTIVITY	0.783667	0.793951	1	-1.72155	0	0.0284754
GO_PATTERN_RECOGNITION_RECEPTOR_SIGNALING_PATHWAY	-2.21757	0	3.31271e-05	-1.72104	0	0.0285878
GSE21360_NAIVE_VS_SECONDARY_MEMORY_CD8_TCELL_DN	-2.21987	0	3.32718e-05	-1.72089	0	0.0285211
ODONNELL_TARGETS_OF_MYC_AND_TFRC_UP	-2.2844	0	6.72992e-06	-1.71849	0	0.0295616
GSE24634_TREG_VS_TCONV_POST_DAY10_IL4_CONVERSION_DN	-2.57293	0	0	-1.71775	0	0.0298211
BIOCARTA_GRANULOCYTES_PATHWAY	-1.8606	0.00590551	0.00693938	-1.71751	0.00271003	0.0298283
GO_INTERMEDIATE_FILAMENT_ORGANIZATION	-1.61639	0.0269231	0.0443639	-1.71657	0	0.0301886
GSE4984_UNTREATED_VS_GALECTIN1_TREATED_DC_UP	-2.4882	0	0	-1.71639	0	0.0301245
ICHIBA_GRAFT_VERSUS_HOST_DISEASE_D7_UP	-2.66037	0	0	-1.71441	0	0.030985
GSE19888_ADENOSINE_A3R_INH_VS_ACT_WITH_INHIBITOR_PRETREATMENT_IN_MAST_CELL_UP	-2.62873	0	0	-1.7134	0	0.0313089
REACTOME_PLATELET_ACTIVATION_SIGNALING_AND_AGGREGATION	1.0409	0.325153	0.77235	-1.71291	0	0.0314199
GO_OXALATE_TRANSPORT	-0.930287	0.545064	0.805827	-1.71286	0	0.0313043
MODULE_186	0.785435	0.774809	1	-1.71279	0.00130039	0.0311814
BROWNE_INTERFERON_RESPONSIVE_GENES	-2.82101	0	0	-1.71275	0	0.0310596
BOYLAN_MULTIPLE_MYELOMA_C_D_DN	-2.35671	0	0	-1.71173	0	0.0314383
MIKKELSEN_MCV6_LCP_WITH_H3K27ME3	-1.2253	0.195329	0.286487	-1.71083	0.00130378	0.0317302
GSE24634_TEFF_VS_TCONV_DAY3_IN_CULTURE_DN	-3.00434	0	0	-1.70998	0	0.0320482
MODULE_162	0.725082	0.833333	1	-1.70897	0.00132626	0.0324874
HALLMARK_INTERFERON_ALPHA_RESPONSE	-2.58208	0	0	-1.70884	0	0.0324489
GSE26495_NAIVE_VS_PD1LOW_CD8_TCELL_DN	-2.86175	0	0	-1.70804	0	0.0327839
GSE13485_PRE_VS_POST_YF17D_VACCINATION_PBMC_DN	-2.98945	0	0	-1.7077	0	0.0328056
GO_NITRIC_OXIDE_MEDIATED_SIGNAL_TRANSDUCTION	0.91983	0.58046	0.98194	-1.70741	0.00133156	0.0328069
GSE21670_STAT3_KO_VS_WT_CD4_TCELL_TGFB_IL6_TREATED_DN	-2.83336	0	0	-1.70733	0	0.0326908
REACTOME_PLATELET_HOMEOSTASIS	-0.995916	0.439331	0.666589	-1.70725	0	0.0325718
BIOCARTA_DC_PATHWAY	-2.06252	0	0.000563449	-1.70671	0.00126743	0.0328065
GSE3982_DC_VS_BCELL_UP	-1.63656	0	0.039098	-1.70626	0	0.0328676
GSE13485_CTRL_VS_DAY7_YF17D_VACCINE_PBMC_DN	-3.08075	0	0	-1.70502	0	0.0334487
MAHADEVAN_RESPONSE_TO_MP470_UP	-1.74518	0.0042735	0.0187553	-1.70438	0.00675676	0.0336567
LENAOUR_DENDRITIC_CELL_MATURATION_DN	-2.2817	0	6.64229e-06	-1.70414	0	0.0336423
DAUER_STAT3_TARGETS_DN	-2.58443	0	0	-1.70385	0.00235571	0.0336515
BURTON_ADIPOGENESIS_7	0.771904	0.876712	1	-1.70297	0	0.0340863
GO_NEGATIVE_REGULATION_OF_LYMPHOCYTE_MEDIATED_IMMUNITY	-2.46532	0	0	-1.70251	0.00124224	0.0342179
GO_LEUKOCYTE_MIGRATION	-2.33564	0	3.98185e-06	-1.70211	0	0.0343638
DUNNE_TARGETS_OF_AML1_MTG8_FUSION_UP	-1.79881	0	0.0121256	-1.70153	0	0.0345893
YAMASHITA_METHYLATED_IN_PROSTATE_CANCER	1.32074	0.0907298	0.39597	-1.70124	0.00114943	0.0346557
STEARMAN_LUNG_CANCER_EARLY_VS_LATE_DN	-1.50537	0.0198807	0.0820855	-1.70073	0	0.0348819
GO_INTRASPECIES_INTERACTION_BETWEEN_ORGANISMS	1.20672	0.174257	0.519857	-1.70051	0	0.0348705
GSE10325_LUPUS_BCELL_VS_LUPUS_MYELOID_DN	-3.20405	0	0	-1.70022	0	0.0348553
KUNINGER_IGF1_VS_PDGFB_TARGETS_UP	1.13034	0.212302	0.621358	-1.69967	0.00112233	0.0350929
GSE13485_CTRL_VS_DAY3_YF17D_VACCINE_PBMC_DN	-3.08426	0	0	-1.69899	0	0.0353022
CASTELLANO_NRAS_TARGETS_UP	-1.21035	0.157258	0.303327	-1.69844	0	0.0354837
WEBER_METHYLATED_HCP_IN_SPERM_DN	1.20681	0.218876	0.519835	-1.69788	0	0.0357045
GSE29618_MONOCYTE_VS_MDC_DAY7_FLU_VACCINE_UP	-2.89377	0	0	-1.69761	0	0.0356862
GSE29618_MONOCYTE_VS_PDC_DAY7_FLU_VACCINE_UP	-2.99518	0	0	-1.6963	0	0.0363142
GO_RESPONSE_TO_HEAT	-1.44469	0.0238095	0.110187	-1.69511	0.00110011	0.0369296
REACTOME_INTERFERON_GAMMA_SIGNALING	-2.21379	0	3.55931e-05	-1.69428	0.00119048	0.0373132
GSE29618_BCELL_VS_MDC_DAY7_FLU_VACCINE_DN	-2.3466	0	4.12314e-06	-1.69398	0	0.037296
REACTOME_G_ALPHA_Q_SIGNALLING_EVENTS	-1.48552	0.00410678	0.0912717	-1.69342	0	0.0374714
SANA_RESPONSE_TO_IFNG_UP	-2.58528	0	0	-1.69332	0	0.0373848
GSE21360_NAIVE_VS_PRIMARY_MEMORY_CD8_TCELL_DN	-2.00502	0	0.00135189	-1.69255	0	0.0377315
WUNDER_INFLAMMATORY_RESPONSE_AND_CHOLESTEROL_UP	-2.06839	0	0.00050536	-1.6921	0.00116009	0.0378816
LEE_LIVER_CANCER_DENA_UP	-1.19693	0.176113	0.320574	-1.6918	0	0.0379194
REACTOME_COMMON_PATHWAY	-1.32176	0.138365	0.194605	-1.69151	0.00140647	0.0379821
GSE6259_33D1_POS_DC_VS_CD4_TCELL_DN	-2.04609	0	0.000724912	-1.69024	0	0.0385906
GO_MONOVALENT_INORGANIC_CATION_HOMEOSTASIS	-1.80729	0	0.011275	-1.68956	0	0.0388724
GO_REGULATED_EXOCYTOSIS	0.947401	0.601253	0.934829	-1.68871	0	0.0393107
GNF2_TNFSF10	-2.57289	0	0	-1.68844	0.00381679	0.0393282
GO_ANION_ANION_ANTIPORTER_ACTIVITY	-1.26657	0.151139	0.241517	-1.68839	0	0.039206
GO_REGULATION_OF_VASOCONSTRICTION	1.46235	0.0227273	0.266443	-1.68797	0	0.0392622
GSE42724_NAIVE_BCELL_VS_PLASMABLAST_UP	-2.68033	0	0	-1.68738	0	0.0395189
GSE22589_HEALTHY_VS_HIV_INFECTED_DC_DN	-1.75717	0	0.0171156	-1.68651	0	0.0398635
REACTOME_RAS_ACTIVATION_UOPN_CA2_INFUX_THROUGH_NMDA_RECEPTOR	-1.02047	0.410526	0.614556	-1.68625	0	0.0398682
GO_TOLL_LIKE_RECEPTOR_4_SIGNALING_PATHWAY	-1.86728	0.00412371	0.0065104	-1.68467	0.00394737	0.0408149
GSE29618_PDC_VS_MDC_DAY7_FLU_VACCINE_DN	-2.91379	0	0	-1.68464	0	0.0406864
LI_WILMS_TUMOR_VS_FETAL_KIDNEY_2_DN	1.21106	0.143939	0.513333	-1.6844	0	0.0406439
GO_REGULATION_OF_COAGULATION	-1.19747	0.16499	0.320164	-1.6836	0	0.0410618
GO_REGULATION_OF_WOUND_HEALING	1.08055	0.289206	0.698947	-1.68252	0	0.0416591
GO_POSITIVE_REGULATION_OF_INFLAMMATORY_RESPONSE	-2.52832	0	0	-1.68204	0	0.0418855
BECKER_TAMOXIFEN_RESISTANCE_UP	-1.23743	0.155319	0.273313	-1.68157	0.0023015	0.0420869
GO_ACUTE_PHASE_RESPONSE	-1.42366	0.0506329	0.12161	-1.6813	0.00364964	0.04213
KEGG_ABC_TRANSPORTERS	-0.859893	0.69697	0.926395	-1.68053	0.0011976	0.0425349
GSE29618_PDC_VS_MDC_DN	-2.78101	0	0	-1.68033	0	0.0425064
GO_ANTIPORTER_ACTIVITY	-1.18806	0.152439	0.332629	-1.68021	0	0.0424286
MODULE_188	-1.9491	0	0.00274585	-1.6796	0	0.0426964
GSE18791_CTRL_VS_NEWCASTLE_VIRUS_DC_8H_DN	-2.43131	0	0	-1.67909	0	0.0429363
DIAZ_CHRONIC_MEYLOGENOUS_LEUKEMIA_DN	-2.25306	0	1.22442e-05	-1.67897	0	0.0428579
BIOCARTA_VITCB_PATHWAY	1.0202	0.456349	0.807491	-1.67857	0.00139082	0.0429718
GO_POSITIVE_REGULATION_OF_PHAGOCYTOSIS	-1.24442	0.13843	0.265227	-1.67834	0.00121655	0.0429975
GSE11057_CD4_EFF_MEM_VS_PBMC_DN	-2.53215	0	0	-1.67798	0	0.0430649
GSE42021_TREG_VS_TCONV_PLN_UP	-2.34897	0	4.17704e-06	-1.67789	0	0.0429935
GSE6259_FLT3L_INDUCED_33D1_POS_DC_VS_CD4_TCELL_UP	-1.93501	0	0.00318724	-1.67777	0	0.0429676
MODULE_46	-2.77791	0	0	-1.67648	0	0.0437495
GSE26030_TH1_VS_TH17_DAY15_POST_POLARIZATION_DN	-1.88589	0	0.00547797	-1.67642	0	0.0436415
MATZUK_FERTILIZATION	0.46662	0.991903	1	-1.67628	0	0.0436073
GO_PURINERGIC_RECEPTOR_SIGNALING_PATHWAY	-1.55896	0.0126582	0.0614781	-1.67577	0.00380228	0.0438132
LEIN_LOCALIZED_TO_DISTAL_AND_PROXIMAL_DENDRITES	-0.991144	0.472222	0.677372	-1.67576	0	0.0436652
KEGG_INTESTINAL_IMMUNE_NETWORK_FOR_IGA_PRODUCTION	-2.06337	0	0.000555035	-1.67552	0.00247219	0.0436531
KEGG_PRIMARY_BILE_ACID_BIOSYNTHESIS	1.13716	0.282101	0.613178	-1.67385	0.00827586	0.0447346
GO_COMPLEMENT_ACTIVATION	-2.27044	0	9.63675e-06	-1.67383	0.00124844	0.044588
GO_PEPTIDE_RECEPTOR_ACTIVITY	-1.89664	0	0.00492422	-1.67332	0	0.0448616
ATM_DN.V1_UP	-1.21014	0.121951	0.303585	-1.67294	0	0.0450125
GO_DETECTION_OF_OTHER_ORGANISM	-1.78463	0	0.0136149	-1.67281	0.00135501	0.0449621
VERHAAK_GLIOBLASTOMA_MESENCHYMAL	-2.50546	0	0	-1.67182	0	0.045591
BOSCO_TH1_CYTOTOXIC_MODULE	-2.86577	0	0	-1.67173	0	0.0454899
WIELAND_UP_BY_HBV_INFECTION	-2.66675	0	0	-1.6717	0	0.0453468
REACTOME_CREB_PHOSPHORYLATION_THROUGH_THE_ACTIVATION_OF_CAMKII	0.973742	0.512428	0.883729	-1.67128	0.00403226	0.0454815
GO_SULFATE_TRANSPORT	-1.14632	0.276639	0.390939	-1.67127	0.00139082	0.0453364
MCLACHLAN_DENTAL_CARIES_UP	-2.76632	0	0	-1.67091	0	0.045437
GO_POSITIVE_REGULATION_OF_RESPONSE_TO_BIOTIC_STIMULUS	-1.98279	0	0.00182063	-1.67042	0.00122549	0.0456633
XU_HGF_TARGETS_INDUCED_BY_AKT1_6HR	1.01312	0.439583	0.819771	-1.67036	0.00133333	0.0455701
GO_MYELOID_LEUKOCYTE_ACTIVATION	-1.9239	0	0.00365446	-1.67001	0	0.0456928
GSE30962_PRIMARY_VS_SECONDARY_CHRONIC_LCMV_INF_CD8_TCELL_DN	-1.83117	0	0.0090747	-1.66979	0	0.0457073
GO_TRIGLYCERIDE_LIPASE_ACTIVITY	-1.2685	0.168421	0.240054	-1.66907	0.00260756	0.0460869
GNF2_CCNA1	1.61775	0.0118812	0.139401	-1.66891	0	0.0460231
MODULE_324	-1.70742	0	0.0247707	-1.66884	0	0.0459331
GSE7218_IGM_VS_IGG_SIGNAL_THGOUGH_ANTIGEN_BCELL_DN	-2.60468	0	0	-1.66827	0	0.0461583
GSE22886_NAIVE_CD8_TCELL_VS_MONOCYTE_DN	-3.18902	0	0	-1.66773	0	0.046429
GSE3920_IFNA_VS_IFNG_TREATED_FIBROBLAST_UP	-2.09725	0	0.000288554	-1.66668	0	0.0471565
REACTOME_EICOSANOID_LIGAND_BINDING_RECEPTORS	-1.0893	0.362069	0.481094	-1.66632	0.00137363	0.0472678
GO_RETINA_HOMEOSTASIS	-0.982285	0.488372	0.697074	-1.66622	0.00348432	0.0471839
GO_POSITIVE_REGULATION_OF_NF_KAPPAB_IMPORT_INTO_NUCLEUS	-2.2193	0	3.31993e-05	-1.66547	0.00130208	0.0476126
ICHIBA_GRAFT_VERSUS_HOST_DISEASE_35D_DN	0.858471	0.712665	1	-1.66487	0.00353774	0.0479551
GSE3982_BCELL_VS_EFF_MEMORY_CD4_TCELL_DN	-1.95678	0	0.00248878	-1.66472	0	0.0479245
GO_EPIBOLY	-0.979594	0.49904	0.703233	-1.66398	0.00131752	0.0483496
MODULE_208	-2.7181	0	0	-1.66285	0	0.0490633
KEGG_TAURINE_AND_HYPOTAURINE_METABOLISM	0.882023	0.619417	1	-1.66267	0.0056338	0.0490266
GSE34156_UNTREATED_VS_6H_TLR1_TLR2_LIGAND_TREATED_MONOCYTE_UP	-2.61298	0	0	-1.66203	0	0.0493535
GO_ACUTE_INFLAMMATORY_RESPONSE	-1.43828	0.0205761	0.113416	-1.66076	0	0.0501818
GSE24634_TREG_VS_TCONV_POST_DAY7_IL4_CONVERSION_DN	-2.45024	0	0	-1.66057	0	0.0501701
PARK_APL_PATHOGENESIS_DN	-1.83729	0	0.00867889	-1.66041	0.00356295	0.0501219
IL15_UP.V1_DN	-1.79539	0	0.0124636	-1.65965	0	0.0506459
GO_REGULATION_OF_LEUKOCYTE_MEDIATED_IMMUNITY	-2.4897	0	0	-1.65958	0	0.0505742
GO_SUPEROXIDE_ANION_GENERATION	-1.6923	0.0192308	0.027312	-1.65955	0.00142248	0.0504501
MEISSNER_ES_ICP_WITH_H3K4ME3_AND_H3K27ME3	0.791908	0.757914	1	-1.65924	0.00139082	0.0505653
GSE36392_EOSINOPHIL_VS_NEUTROPHIL_IL25_TREATED_LUNG_UP	-1.82346	0	0.00981114	-1.65841	0	0.0511282
RICKMAN_HEAD_AND_NECK_CANCER_C	-1.18505	0.157787	0.337115	-1.65833	0	0.0510173
GO_REGULATION_OF_PHAGOCYTOSIS	-1.43281	0.0236052	0.11649	-1.65653	0.00112233	0.0522161
GO_REGULATION_OF_PLATELET_AGGREGATION	-0.971899	0.496945	0.719534	-1.65646	0.00533333	0.0521053
GSE26495_NAIVE_VS_PD1HIGH_CD8_TCELL_DN	-2.76418	0	0	-1.65605	0	0.0522794
GO_RESPONSE_TO_INTERFERON_GAMMA	-2.18635	0	6.5479e-05	-1.65545	0	0.0525863
GO_POSITIVE_REGULATION_OF_CYTOKINE_PRODUCTION_INVOLVED_IN_IMMUNE_RESPONSE	-1.5921	0.0223214	0.0512127	-1.65525	0.00125313	0.0526029
GO_BILE_ACID_BIOSYNTHETIC_PROCESS	1.45622	0.0582524	0.271783	-1.65506	0.00267738	0.0526278
GSE19512_NAUTRAL_VS_INDUCED_TREG_UP	-1.164	0.1423	0.366032	-1.65489	0	0.0526038
GSE25123_CTRL_VS_ROSIGLITAZONE_STIM_PPARG_KO_MACROPHAGE_UP	-2.24556	0	2.10284e-05	-1.65408	0	0.0531374
GO_DEFENSE_RESPONSE_TO_BACTERIUM	-2.54567	0	0	-1.65391	0	0.0531307
GO_POSITIVE_REGULATION_OF_CYTOKINE_SECRETION	-2.21212	0	3.81635e-05	-1.65253	0	0.0540821
GSE36078_WT_VS_IL1R_KO_LUNG_DC_AFTER_AD5_INF_UP	-2.15489	0	0.000111906	-1.65208	0	0.0542596
GO_POSITIVE_REGULATION_OF_BLOOD_PRESSURE	-1.19682	0.206349	0.320601	-1.65183	0.00370828	0.0543004
BIOCARTA_MONOCYTE_PATHWAY	-1.28576	0.169811	0.224253	-1.65177	0.00413793	0.0541976
GSE21546_UNSTIM_VS_ANTI_CD3_STIM_ELK1_KO_DP_THYMOCYTES_UP	-1.93462	0	0.00320676	-1.65119	0	0.0545159
GO_CATECHOLAMINE_BINDING	1.61381	0.0202952	0.141409	-1.65039	0.00823045	0.0550275
GO_STRUCTURAL_CONSTITUENT_OF_MUSCLE	-0.865777	0.719124	0.917236	-1.65027	0.00364964	0.0549576
REACTOME_PLATELET_AGGREGATION_PLUG_FORMATION	1.29745	0.118952	0.418015	-1.65005	0.00240964	0.0549747
REACTOME_INTERFERON_ALPHA_BETA_SIGNALING	-2.38271	0	0	-1.64973	0.00115741	0.055091
GSE14769_UNSTIM_VS_120MIN_LPS_BMDM_DN	-1.28414	0.0444015	0.225343	-1.6495	0	0.0551258
GSE40274_CTRL_VS_FOXP3_AND_EOS_TRANSDUCED_ACTIVATED_CD4_TCELL_UP	-1.8694	0	0.00642312	-1.6494	0	0.0550513
INGRAM_SHH_TARGETS_DN	-1.30097	0.0910931	0.210771	-1.64909	0.00229358	0.0551536
RICKMAN_HEAD_AND_NECK_CANCER_E	-1.21859	0.155642	0.293846	-1.64816	0.00229621	0.0556919
FOSTER_TOLERANT_MACROPHAGE_UP	-2.08345	0	0.000376605	-1.64764	0	0.056031
LIANG_SILENCED_BY_METHYLATION_UP	-0.958287	0.523614	0.747821	-1.64709	0.00508906	0.0563683
GO_POSITIVE_REGULATION_OF_VASOCONSTRICTION	1.55272	0.0135135	0.185479	-1.64691	0.00124224	0.0563195
GO_POSITIVE_REGULATION_OF_RESPONSE_TO_WOUNDING	-2.01892	0	0.0010852	-1.64685	0	0.0561969
VILIMAS_NOTCH1_TARGETS_DN	-1.4406	0.0628931	0.112208	-1.64683	0.00127714	0.0560546
GO_NEGATIVE_REGULATION_OF_LEUKOCYTE_MEDIATED_IMMUNITY	-2.25833	0	1.2515e-05	-1.64676	0.00120482	0.0559462
IVANOVA_HEMATOPOIESIS_MATURE_CELL	-1.87545	0	0.00603359	-1.64646	0	0.0560613
GO_RESPONSE_TO_PH	-1.32502	0.103239	0.191642	-1.64641	0.00118343	0.0559382
NAKAYAMA_SOFT_TISSUE_TUMORS_PCA1_UP	-2.3861	0	0	-1.64596	0.00114416	0.0562088
GO_NEGATIVE_REGULATION_OF_CELL_KILLING	-1.70902	0.0107527	0.0245702	-1.64567	0.00268817	0.0562869
REACTOME_BILE_SALT_AND_ORGANIC_ANION_SLC_TRANSPORTERS	-0.770824	0.778032	1	-1.64485	0.00555556	0.0567177
GO_CCR_CHEMOKINE_RECEPTOR_BINDING	-2.09708	0	0.000288095	-1.64455	0.0025974	0.0568339
GO_TOLL_LIKE_RECEPTOR_SIGNALING_PATHWAY	-2.18159	0	7.2312e-05	-1.64392	0.00108932	0.0572757
HOFFMANN_PRE_BI_TO_LARGE_PRE_BII_LYMPHOCYTE_DN	0.96728	0.501953	0.895499	-1.64391	0	0.0571191
GO_REGULATION_OF_INTERLEUKIN_2_BIOSYNTHETIC_PROCESS	-2.04908	0	0.000694445	-1.64348	0.00390625	0.0573174
REACTOME_NITRIC_OXIDE_STIMULATES_GUANYLATE_CYCLASE	1.0877	0.33908	0.689359	-1.64243	0.00508259	0.0580852
KANG_GLIS3_TARGETS	-0.990541	0.477733	0.678668	-1.64237	0.00494438	0.0579819
KEGG_LEUKOCYTE_TRANSENDOTHELIAL_MIGRATION	-0.958605	0.535509	0.747358	-1.64197	0	0.0581738
ISSAEVA_MLL2_TARGETS	-1.13751	0.22293	0.403959	-1.64176	0.00574713	0.0581932
MIKKELSEN_IPS_ICP_WITH_H3K4ME3_AND_H327ME3	1.33253	0.0444874	0.389098	-1.64162	0	0.0581489
ZHENG_IL22_SIGNALING_UP	-1.57151	0.006	0.0576621	-1.64075	0.00117786	0.058894
GO_B_CELL_MEDIATED_IMMUNITY	-2.31194	0	7.37179e-06	-1.63991	0.00232288	0.0595283
GO_ICOSANOID_RECEPTOR_ACTIVITY	-1.03923	0.399202	0.576384	-1.63956	0.00677507	0.0596479
GNATENKO_PLATELET_SIGNATURE	0.955046	0.539877	0.921421	-1.63948	0.00246305	0.0595761
DAVIES_MULTIPLE_MYELOMA_VS_MGUS_DN	-2.15535	0	0.000112107	-1.63945	0.00372208	0.0594468
GO_WATER_HOMEOSTASIS	-1.06675	0.334021	0.522432	-1.63854	0.00118064	0.0600728
GSE24634_TREG_VS_TCONV_POST_DAY5_IL4_CONVERSION_DN	-2.55327	0	0	-1.63792	0	0.0604749
GSE13485_DAY7_VS_DAY21_YF17D_VACCINE_PBMC_UP	-2.34149	0	4.04485e-06	-1.6379	0.00104384	0.0603419
GO_REGULATION_OF_VASCULAR_ENDOTHELIAL_GROWTH_FACTOR_PRODUCTION	-1.8405	0.00203252	0.00844419	-1.63629	0.00360577	0.0616614
GO_G_PROTEIN_COUPLED_PURINERGIC_RECEPTOR_SIGNALING_PATHWAY	-1.7888	0.00428265	0.0131754	-1.63563	0.00262123	0.0621228
GO_PHOTORECEPTOR_OUTER_SEGMENT	-0.709035	0.931677	1	-1.63537	0	0.0621904
GO_CORTICAL_CYTOSKELETON	-1.28575	0.106472	0.224223	-1.634	0	0.063239
LEE_LIVER_CANCER_E2F1_DN	1.62314	0.00573614	0.135908	-1.63366	0.00116414	0.0633741
GSE18791_CTRL_VS_NEWCASTLE_VIRUS_DC_10H_DN	-2.2391	0	2.06381e-05	-1.63349	0	0.0633719
MODULE_79	-2.37433	0	0	-1.63326	0	0.063412
GO_INSEMINATION	0.665478	0.880077	1	-1.6321	0.00564972	0.0642827
KEGG_METABOLISM_OF_XENOBIOTICS_BY_CYTOCHROME_P450	0.894212	0.639839	1	-1.63207	0.00482509	0.0641335
GO_SOLUTE_CATION_ANTIPORTER_ACTIVITY	-1.17331	0.21875	0.353193	-1.63189	0.00246305	0.0641179
MODULE_145	-1.80233	0	0.011744	-1.63153	0	0.0642719
REACTOME_AMINE_DERIVED_HORMONES	1.45234	0.0654762	0.27404	-1.63145	0.00834492	0.0641841
GSE17974_IL4_AND_ANTI_IL12_VS_UNTREATED_0.5H_ACT_CD4_TCELL_DN	1.11593	0.226453	0.644287	-1.63089	0	0.0645288
GO_REGULATION_OF_LEUKOCYTE_MEDIATED_CYTOTOXICITY	-2.46441	0	0	-1.63031	0.00468384	0.0649799
GO_LYMPHOCYTE_MIGRATION	-2.35851	0	0	-1.63001	0.0035545	0.0650909
GO_POSITIVE_REGULATION_OF_TRANSCRIPTION_FACTOR_IMPORT_INTO_NUCLEUS	-2.16523	0	8.99139e-05	-1.62965	0.00694444	0.0652473
HUPER_BREAST_BASAL_VS_LUMINAL_UP	1.22147	0.165669	0.497763	-1.62951	0.00355872	0.0652085
GSE6259_CD4_TCELL_VS_CD8_TCELL_DN	-2.16214	0	0.00010543	-1.62947	0	0.0650946
GO_LEUKOCYTE_MEDIATED_IMMUNITY	-2.37531	0	0	-1.62946	0	0.0649335
GO_NEGATIVE_REGULATION_OF_IMMUNE_RESPONSE	-1.67925	0	0.0299767	-1.62941	0	0.0648164
WILENSKY_RESPONSE_TO_DARAPLADIB	-2.59497	0	0	-1.62927	0.00746269	0.0647631
ZHANG_RESPONSE_TO_CANTHARIDIN_UP	-0.969296	0.504202	0.725005	-1.62814	0.00641848	0.0657688
REACTOME_SYNTHESIS_OF_BILE_ACIDS_AND_BILE_SALTS	1.34935	0.104126	0.371366	-1.62806	0.00643501	0.0657023
PID_INTEGRIN3_PATHWAY	1.27953	0.132296	0.433852	-1.62723	0.00117786	0.0663638
GO_PLATELET_AGGREGATION	0.943084	0.53484	0.944574	-1.62684	0.00481348	0.0665783
TONKS_TARGETS_OF_RUNX1_RUNX1T1_FUSION_ERYTHROCYTE_UP	-1.87926	0	0.00585306	-1.62666	0	0.0665952
MODULE_134	-2.31556	0	7.50188e-06	-1.62665	0.00377358	0.0664403
GSE24634_TEFF_VS_TCONV_DAY10_IN_CULTURE_DN	-2.65227	0	0	-1.62575	0	0.0670932
MODULE_75	-2.73052	0	0	-1.62528	0	0.0673792
MODULE_71	0.580531	0.96988	1	-1.62508	0.00385109	0.0674359
AR_02	0.989203	0.453155	0.858368	-1.62497	0.00361446	0.0673731
GSE3039_CD4_TCELL_VS_ALPHABETA_CD8_TCELL_UP	-1.64014	0	0.0384149	-1.62476	0	0.06739
GO_REGULATION_OF_INTERLEUKIN_8_SECRETION	-1.16793	0.272917	0.360852	-1.62472	0.00401069	0.0672376
GO_SECRETORY_GRANULE_MEMBRANE	0.910215	0.631356	0.993657	-1.62457	0.00111359	0.0672042
GO_REGULATION_OF_CARDIAC_MUSCLE_CELL_MEMBRANE_REPOLARIZATION	1.08544	0.34236	0.692117	-1.62454	0.00664011	0.0670639
GSE40685_TREG_VS_FOXP3_KO_TREG_PRECURSOR_DN	-2.69145	0	0	-1.62445	0	0.0669985
REACTOME_GASTRIN_CREB_SIGNALLING_PATHWAY_VIA_PKC_AND_MAPK	-1.38346	0.0237154	0.146992	-1.62389	0.00102669	0.0673768
GSE29618_BCELL_VS_MONOCYTE_DN	-2.75889	0	0	-1.62367	0	0.0674563
SU_LIVER	-1.472	0.0306748	0.097048	-1.62304	0.00490196	0.0678493
GSE3982_NKCELL_VS_TH2_UP	-1.88523	0	0.00550282	-1.62252	0	0.0681734
MODULE_146	-2.29466	0	7.04597e-06	-1.62241	0	0.0681233
GO_INNATE_IMMUNE_RESPONSE	-2.71001	0	0	-1.6223	0	0.068082
VERNOCHET_ADIPOGENESIS	-1.41419	0.0749465	0.127164	-1.62226	0.00512164	0.0679552
MODULE_64	-2.28761	0	6.85656e-06	-1.62217	0	0.0678846
GO_BLOOD_MICROPARTICLE	-1.82154	0	0.00997584	-1.6219	0.00110988	0.0679935
GO_REGULATION_OF_CYTOKINE_PRODUCTION_INVOLVED_IN_IMMUNE_RESPONSE	-1.85739	0	0.0071385	-1.62168	0.00116686	0.0680167
GO_LEUKOTRIENE_METABOLIC_PROCESS	-1.08577	0.334783	0.486551	-1.62132	0.00387597	0.0682183
GO_NEGATIVE_REGULATION_OF_IMMUNE_EFFECTOR_PROCESS	-1.84096	0	0.00841569	-1.6212	0	0.0681753
GO_HUMORAL_IMMUNE_RESPONSE_MEDIATED_BY_CIRCULATING_IMMUNOGLOBULIN	-2.36925	0	0	-1.6212	0.00863132	0.0680184
TING_SILENCED_BY_DICER	0.959926	0.49703	0.9112	-1.62088	0.00512821	0.06817
GO_CELLULAR_RESPONSE_TO_FATTY_ACID	-1.62068	0.00828157	0.0431545	-1.62065	0.00116144	0.0682304
GO_CHEMOKINE_RECEPTOR_BINDING	-1.89982	0	0.00475289	-1.62043	0.00120048	0.0682779
GO_CALCIUM_DEPENDENT_PROTEIN_BINDING	-0.948411	0.576613	0.770333	-1.61993	0.00224972	0.068562
GSE2405_0H_VS_3H_A_PHAGOCYTOPHILUM_STIM_NEUTROPHIL_DN	-1.5567	0	0.0622361	-1.61973	0	0.0686169
GSE20366_CD103_POS_VS_CD103_KLRG1_DP_TREG_DN	-1.432	0.00413223	0.116824	-1.61934	0	0.0688321
GSE3565_CTRL_VS_LPS_INJECTED_DUSP1_KO_SPLENOCYTES_UP	-2.51	0	0	-1.61924	0	0.0687593
GO_REGULATION_OF_PH	-1.46763	0.0214425	0.0994111	-1.61858	0	0.0692283
AGCGCTT_MIR518F_MIR518E_MIR518A	-0.770951	0.763326	1	-1.61807	0.00937082	0.0696
CHR1Q23	-2.07136	0	0.000474424	-1.61803	0.00113766	0.0694764
GSE36888_STAT5_AB_KNOCKIN_VS_WT_TCELL_IL2_TREATED_2H_DN	-2.03536	0	0.000852236	-1.61771	0	0.0696253
GSE34156_TLR1_TLR2_LIGAND_VS_NOD2_AND_TLR1_TLR2_LIGAND_24H_TREATED_MONOCYTE_UP	-2.87749	0	0	-1.61764	0	0.0695351
GSE40685_TREG_VS_FOXP3_KO_TREG_PRECURSOR_UP	-2.61965	0	0	-1.61712	0	0.0699251
REACTOME_INTERACTION_BETWEEN_L1_AND_ANKYRINS	-1.78263	0.00203666	0.0138188	-1.61708	0.00650195	0.0697896
GO_SARCOLEMMA	-1.13265	0.206681	0.410681	-1.61657	0	0.0701181
STEGER_ADIPOGENESIS_DN	1.25563	0.167293	0.455422	-1.61593	0.00257069	0.0706914
GNF2_PCAF	-2.33325	0	3.95719e-06	-1.61514	0.00383632	0.0712803
GSE18281_CORTICAL_VS_MEDULLARY_THYMOCYTE_UP	-1.92483	0	0.00362752	-1.61497	0	0.0713256
GSE24142_ADULT_VS_FETAL_DN2_THYMOCYTE_UP	-1.52534	0	0.0737609	-1.61455	0	0.0716253
GO_REGULATION_OF_LIPOPROTEIN_METABOLIC_PROCESS	-0.431869	1	1	-1.61451	0.00139665	0.0715181
GO_POSITIVE_REGULATION_OF_VASCULAR_ENDOTHELIAL_GROWTH_FACTOR_PRODUCTION	-1.54476	0.0417495	0.0666609	-1.61402	0.005148	0.0718544
GO_DEFENSE_RESPONSE	-2.52229	0	0	-1.61374	0	0.0720324
GO_NEGATIVE_REGULATION_OF_ACTIN_FILAMENT_BUNDLE_ASSEMBLY	1.35654	0.11306	0.362499	-1.6133	0.0039267	0.0723639
GO_SODIUM_ION_BINDING	-0.833768	0.691511	0.953751	-1.61293	0.00393185	0.0725979
LEE_LIVER_CANCER_MYC_TGFA_DN	1.1318	0.240385	0.619282	-1.61276	0.00115607	0.0726294
GO_THYROID_HORMONE_METABOLIC_PROCESS	1.27721	0.166008	0.434469	-1.61256	0	0.0726986
HALMOS_CEBPA_TARGETS_UP	-1.35442	0.0654008	0.168161	-1.61255	0.00238095	0.072543
AMIT_SERUM_RESPONSE_240_MCF10A	-1.04578	0.3875	0.564173	-1.61241	0	0.0725508
JISON_SICKLE_CELL_DISEASE_UP	-1.54812	0	0.0653818	-1.61219	0	0.0726316
COLIN_PILOCYTIC_ASTROCYTOMA_VS_GLIOBLASTOMA_DN	-1.03195	0.404124	0.590611	-1.61196	0.00379747	0.0727022
GO_PURINERGIC_NUCLEOTIDE_RECEPTOR_SIGNALING_PATHWAY	-1.50537	0.0400891	0.0820592	-1.61155	0.00768246	0.0729713
BIOCARTA_AMI_PATHWAY	0.922323	0.571691	0.978843	-1.61151	0.00928382	0.0728522
GSE42021_CD24HI_VS_CD24INT_TREG_THYMUS_DN	-2.71935	0	0	-1.61126	0	0.0729512
GO_SODIUM_CHANNEL_COMPLEX	-1.02417	0.43125	0.60648	-1.61067	0.00730994	0.0734938
GO_SODIUM_ION_TRANSMEMBRANE_TRANSPORTER_ACTIVITY	-1.27621	0.0792079	0.232902	-1.61054	0	0.0734875
GSE6269_FLU_VS_STAPH_AUREUS_INF_PBMC_DN	-2.0028	0	0.0014013	-1.61033	0	0.0735319
GSE3982_DC_VS_TH1_UP	-1.81416	0	0.0105833	-1.61018	0	0.0735449
GO_UNSATURATED_FATTY_ACID_METABOLIC_PROCESS	-0.881371	0.717895	0.894278	-1.61013	0	0.0734164
GO_BILE_ACID_METABOLIC_PROCESS	1.76847	0	0.0626377	-1.60994	0.00635324	0.0734587
BIOCARTA_LAIR_PATHWAY	-1.74081	0.00796813	0.0194337	-1.60959	0.010989	0.0736862
GO_POSITIVE_REGULATION_OF_PROTEIN_SECRETION	-1.76608	0	0.0159125	-1.60955	0	0.0735755
GO_ACTIN_CYTOSKELETON_REORGANIZATION	0.815591	0.796371	1	-1.60935	0.00232288	0.0736537
LIAN_LIPA_TARGETS_6M	-2.75218	0	0	-1.60904	0.00111982	0.073818
REACTOME_ABC_FAMILY_PROTEINS_MEDIATED_TRANSPORT	0.713466	0.898608	1	-1.60892	0.00494438	0.0737786
GO_POSITIVE_REGULATION_OF_CHEMOTAXIS	-1.7715	0	0.0152333	-1.60824	0	0.074385
GO_LONG_CHAIN_FATTY_ACID_METABOLIC_PROCESS	-1.01648	0.403226	0.622298	-1.60806	0.003386	0.0744169
BIOCARTA_LYM_PATHWAY	-1.08891	0.371739	0.481671	-1.60763	0.01	0.0747341
NAKAMURA_LUNG_CANCER_DIFFERENTIATION_MARKERS	0.905189	0.576305	0.998345	-1.60748	0.00947226	0.0747368
GSE10325_BCELL_VS_MYELOID_DN	-3.19876	0	0	-1.60747	0	0.0745784
GO_SECOND_MESSENGER_MEDIATED_SIGNALING	-1.05733	0.340249	0.541762	-1.60703	0	0.0748668
GSE13484_UNSTIM_VS_YF17D_VACCINE_STIM_PBMC_DN	-2.25846	0	1.25458e-05	-1.60678	0	0.0749786
GO_REGULATION_OF_NATURAL_KILLER_CELL_MEDIATED_IMMUNITY	-2.3799	0	0	-1.6061	0.00641026	0.0755133
GO_NEUROMUSCULAR_PROCESS_CONTROLLING_BALANCE	0.784249	0.824847	1	-1.606	0.00233645	0.0754391
KEGG_LYSOSOME	-1.82078	0	0.0100372	-1.60589	0	0.0754121
IL21_UP.V1_DN	-1.47434	0.00410678	0.0961008	-1.60581	0	0.0753441
GSE15733_BM_VS_SPLEEN_MEMORY_CD4_TCELL_UP	-1.73294	0	0.0206269	-1.60528	0	0.0757337
GO_RESPONSE_TO_WOUNDING	1.08336	0.192607	0.696087	-1.6049	0	0.0759409
GO_REGULATION_OF_ANION_TRANSMEMBRANE_TRANSPORT	0.998477	0.469231	0.840578	-1.60464	0.00772201	0.0760582
GO_RESPONSE_TO_MOLECULE_OF_BACTERIAL_ORIGIN	-1.93691	0	0.00310616	-1.60457	0	0.0759801
GO_DIGESTION	-1.2308	0.113462	0.280069	-1.6043	0	0.0760782
GO_REGULATION_OF_INTERFERON_GAMMA_SECRETION	-1.64963	0.021645	0.0362343	-1.60412	0.00962861	0.0760983
GO_LEUKOCYTE_CHEMOTAXIS	-2.61019	0	0	-1.60383	0.00108696	0.0762787
HALLMARK_INFLAMMATORY_RESPONSE	-2.19134	0	5.59252e-05	-1.60379	0	0.0761751
RAMALHO_STEMNESS_DN	-2.48185	0	0	-1.60375	0.00112233	0.0760535
GSE6259_FLT3L_INDUCED_DEC205_POS_DC_VS_CD8_TCELL_DN	-2.3068	0	7.28755e-06	-1.60282	0	0.0768463
GO_MYELIN_MAINTENANCE	-0.990565	0.457031	0.678676	-1.6019	0.0100287	0.0776396
GO_G_PROTEIN_COUPLED_PURINERGIC_NUCLEOTIDE_RECEPTOR_SIGNALING_PATHWAY	-1.67354	0.0103734	0.0312096	-1.60181	0.00666667	0.0775687
GO_REGULATION_OF_HAIR_FOLLICLE_DEVELOPMENT	1.36749	0.128968	0.348301	-1.60141	0.00804289	0.0778622
GSE22886_NAIVE_BCELL_VS_NEUTROPHIL_DN	-2.82188	0	0	-1.60068	0	0.0784398
REACTOME_TRAFFICKING_AND_PROCESSING_OF_ENDOSOMAL_TLR	-1.59445	0.0224949	0.050588	-1.60052	0.00410397	0.0784439
MODULE_418	1.12482	0.232742	0.630603	-1.60003	0.00456621	0.0788155
GO_REGULATION_OF_MUSCLE_CELL_APOPTOTIC_PROCESS	-1.03668	0.393004	0.581249	-1.59991	0.0120773	0.0787935
GO_NEGATIVE_REGULATION_OF_INTERLEUKIN_6_PRODUCTION	-1.82189	0	0.00994594	-1.59991	0.00361882	0.0786419
MODULE_539	-1.57097	0.0379747	0.0577239	-1.59962	0.00396301	0.0787966
GSE34156_UNTREATED_VS_6H_NOD2_AND_TLR1_TLR2_LIGAND_TREATED_MONOCYTE_DN	-2.43829	0	0	-1.59922	0	0.0790781
GSE21546_UNSTIM_VS_ANTI_CD3_STIM_SAP1A_KO_AND_ELK1_KO_DP_THYMOCYTES_DN	-1.42593	0.0162272	0.120527	-1.59916	0	0.0789913
SEKI_INFLAMMATORY_RESPONSE_LPS_UP	-1.1607	0.214876	0.370585	-1.59903	0.00110497	0.0789567
BIOCARTA_BLYMPHOCYTE_PATHWAY	-1.98687	0.00194932	0.00172151	-1.59859	0.00577201	0.0792131
GO_REGULATION_OF_LYMPHOCYTE_CHEMOTAXIS	-2.19471	0	5.68327e-05	-1.59833	0.00534759	0.0793509
GSE40493_BCL6_KO_VS_WT_TREG_DN	1.16242	0.179688	0.583392	-1.59824	0	0.0792838
GO_WOUND_HEALING	1.03672	0.313402	0.778226	-1.59788	0	0.0795309
KIM_GLIS2_TARGETS_UP	-1.51375	0.00594059	0.0783987	-1.59731	0.00221484	0.0799716
GO_REGULATION_OF_PLATELET_ACTIVATION	-1.11864	0.26824	0.433869	-1.59693	0.00749064	0.0802641
GO_MACROPHAGE_ACTIVATION	-1.86412	0.0020202	0.00669674	-1.59672	0.00739827	0.080328
GO_ARACHIDONIC_ACID_METABOLIC_PROCESS	-0.966927	0.528689	0.730148	-1.59659	0.00124069	0.0802983
GO_REGULATION_OF_HEART_RATE_BY_CARDIAC_CONDUCTION	-1.19753	0.206478	0.320109	-1.5965	0.0101138	0.0802547
GO_SODIUM_ION_TRANSMEMBRANE_TRANSPORT	-1.01753	0.422998	0.61995	-1.59642	0.00111235	0.0801622
GSE1791_CTRL_VS_NEUROMEDINU_IN_T_CELL_LINE_0.8H_DN	-1.73916	0	0.0196961	-1.5956	0	0.0808818
AMIT_EGF_RESPONSE_240_MCF10A	1.1794	0.232465	0.560901	-1.59557	0.00649351	0.0807587
NABA_ECM_AFFILIATED	-1.82585	0	0.00958614	-1.59485	0	0.0814082
GO_REGULATION_OF_ACUTE_INFLAMMATORY_RESPONSE	-1.72873	0	0.0212501	-1.59374	0.00337458	0.0825158
GO_GLYCEROLIPID_CATABOLIC_PROCESS	-0.953953	0.513627	0.757243	-1.59342	0.00357143	0.0826767
GSE21546_SAP1A_KO_VS_SAP1A_KO_AND_ELK1_KO_ANTI_CD3_STIM_DP_THYMOCYTES_DN	-1.78777	0	0.0132904	-1.59318	0	0.0827901
NADLER_OBESITY_DN	-0.75538	0.885375	1	-1.59297	0.00578704	0.0828496
GO_RESPONSE_TO_WATER_DEPRIVATION	1.22912	0.223282	0.487306	-1.59282	0.0140449	0.0828588
GO_POSITIVE_REGULATION_OF_LYMPHOCYTE_MIGRATION	-1.78948	0.00194553	0.0131099	-1.59282	0.00905563	0.0827008
PARK_TRETINOIN_RESPONSE	-1.06258	0.381857	0.531514	-1.59273	0.0152144	0.0826587
GO_MICROVILLUS	1.06564	0.327485	0.724373	-1.5919	0.00224972	0.0834557
FARMER_BREAST_CANCER_CLUSTER_1	-2.96397	0	0	-1.59175	0.00626566	0.0835099
GO_REGULATION_OF_HAIR_CYCLE	1.23648	0.183784	0.480006	-1.59099	0.0126103	0.084227
GSE3982_MAC_VS_TH1_UP	-1.48402	0.00378788	0.0919718	-1.59081	0.00103413	0.0842727
GSE42021_TREG_PLN_VS_CD24INT_TREG_THYMUS_DN	-2.46281	0	0	-1.59067	0	0.0842875
GSE37533_PPARG2_FOXP3_VS_FOXP3_TRANSDUCED_CD4_TCELL_DN	-2.53906	0	0	-1.59056	0	0.0842581
KIM_RESPONSE_TO_TSA_AND_DECITABINE_UP	-1.46207	0.00614754	0.101643	-1.59051	0	0.0841678
REACTOME_GAP_JUNCTION_TRAFFICKING	1.62718	0.0223124	0.132949	-1.59049	0.0104302	0.0840304
GO_RESPONSE_TO_BACTERIUM	-2.22383	0	3.35649e-05	-1.59034	0	0.0840355
GSE24142_EARLY_THYMIC_PROGENITOR_VS_DN3_THYMOCYTE_UP	-1.58199	0	0.0543788	-1.58998	0	0.0842885
CHR11Q24	-0.946766	0.562118	0.773038	-1.5895	0.00915332	0.0846939
KEGG_GLYCOSPHINGOLIPID_BIOSYNTHESIS_GLOBO_SERIES	-1.07525	0.400826	0.505249	-1.58937	0.00821918	0.0847077
GO_REGULATION_OF_INTERFERON_ALPHA_PRODUCTION	-1.73693	0.00638298	0.0200557	-1.58932	0.00770218	0.0846192
GAVIN_FOXP3_TARGETS_CLUSTER_P3	-1.96827	0	0.00216333	-1.58917	0	0.084603
GNF2_HCK	-3.27601	0	0	-1.58905	0	0.0845936
GSE3565_DUSP1_VS_WT_SPLENOCYTES_POST_LPS_INJECTION_DN	-1.57638	0	0.056063	-1.58888	0	0.0846243
GO_REGULATION_OF_WATER_LOSS_VIA_SKIN	0.770519	0.807619	1	-1.58817	0.0110497	0.0853139
GSE3039_CD4_TCELL_VS_B2_BCELL_UP	-1.54307	0.00204499	0.0672078	-1.58763	0	0.0857667
GO_REGULATION_OF_LYMPHOCYTE_MIGRATION	-2.14448	0	0.000131837	-1.58749	0.00747198	0.0857751
BOSCO_EPITHELIAL_DIFFERENTIATION_MODULE	-1.26588	0.10978	0.242099	-1.58716	0.00478469	0.0859655
GO_LYMPHOCYTE_CHEMOTAXIS	-2.25727	0	1.24843e-05	-1.58676	0.011658	0.0862528
GO_CELLULAR_RESPONSE_TO_HEAT	-1.60607	0.0168067	0.0471558	-1.58673	0.0101523	0.0861267
KAMIKUBO_MYELOID_MN1_NETWORK	-0.808797	0.746535	0.978021	-1.58657	0.0127551	0.0861688
GO_NEGATIVE_REGULATION_OF_CELL_ACTIVATION	-1.78533	0	0.0135322	-1.58644	0	0.0861862
GSE26030_TH1_VS_TH17_DAY5_POST_POLARIZATION_UP	-2.29907	0	7.14465e-06	-1.586	0	0.0865778
REACTOME_BILE_ACID_AND_BILE_SALT_METABOLISM	1.62456	0.0168224	0.135607	-1.5858	0.0128041	0.0866844
HUPER_BREAST_BASAL_VS_LUMINAL_DN	-1.11976	0.261134	0.432326	-1.58576	0.00115741	0.0865717
GSE15767_MED_VS_SCS_MAC_LN_UP	-2.27923	0	6.5908e-06	-1.58556	0	0.0866535
KEGG_CALCIUM_SIGNALING_PATHWAY	1.02637	0.371542	0.796697	-1.58535	0	0.0867464
GSE21670_UNTREATED_VS_IL6_TREATED_STAT3_KO_CD4_TCELL_UP	-2.45542	0	0	-1.58385	0	0.0884155
GSE18791_CTRL_VS_NEWCASTLE_VIRUS_DC_14H_DN	-1.89891	0	0.00480893	-1.58377	0	0.0883589
GO_MODIFIED_AMINO_ACID_TRANSMEMBRANE_TRANSPORTER_ACTIVITY	1.00224	0.441121	0.834136	-1.5835	0.0134228	0.0885275
GO_FATTY_ACID_DERIVATIVE_METABOLIC_PROCESS	-0.923811	0.635611	0.81796	-1.5835	0.00225734	0.0883739
GO_NEGATIVE_REGULATION_OF_EXOCYTOSIS	1.05689	0.389662	0.744454	-1.58311	0.0143791	0.088666
ZHANG_TLX_TARGETS_UP	-1.221	0.105906	0.29149	-1.5828	0.00107181	0.0888733
GO_BASOLATERAL_PLASMA_MEMBRANE	-1.2151	0.0658683	0.297933	-1.58179	0	0.0899016
MODULE_489	1.22864	0.189753	0.488455	-1.58165	0.00729927	0.0898895
MODULE_311	1.08753	0.342742	0.689469	-1.58156	0.00938338	0.0898277
GROSS_ELK3_TARGETS_UP	1.30538	0.129412	0.41098	-1.58143	0.011236	0.0898173
MODULE_119	-2.3865	0	0	-1.58119	0	0.089989
GO_POSITIVE_REGULATION_OF_SECRETION	-1.45211	0	0.106473	-1.5811	0	0.0899449
GO_MYELOID_LEUKOCYTE_MIGRATION	-2.32369	0	3.83836e-06	-1.58104	0	0.0898421
GSE10325_MYELOID_VS_LUPUS_MYELOID_DN	-2.47711	0	0	-1.58099	0	0.0897571
GO_LYMPHOCYTE_MEDIATED_IMMUNITY	-2.56093	0	0	-1.58044	0.00221729	0.090273
GO_REGULATION_OF_INTERLEUKIN_2_PRODUCTION	-1.97714	0	0.00193628	-1.58042	0.00118064	0.0901401
GSE21774_CD62L_POS_CD56_BRIGHT_VS_CD62L_NEG_CD56_DIM_NK_CELL_UP	-2.10729	0	0.000241947	-1.58022	0	0.0902147
TAKEDA_TARGETS_OF_NUP98_HOXA9_FUSION_16D_DN	-1.734	0	0.020494	-1.58002	0.00107296	0.0902715
GO_ORGANIC_HYDROXY_COMPOUND_TRANSMEMBRANE_TRANSPORTER_ACTIVITY	1.02606	0.388889	0.797212	-1.57976	0.00824499	0.0904211
GO_MYOFILAMENT	1.04509	0.363636	0.766642	-1.57958	0.00761421	0.0904805
HASEGAWA_TUMORIGENESIS_BY_RET_C634R	-1.34291	0.127883	0.176998	-1.57897	0.00847458	0.0911137
GSE2128_CTRL_VS_MIMETOPE_NEGATIVE_SELECTION_DP_THYMOCYTE_NOD_UP	-1.98502	0	0.001767	-1.57886	0	0.0910778
GSE34156_NOD2_LIGAND_VS_TLR1_TLR2_LIGAND_6H_TREATED_MONOCYTE_DN	-2.66105	0	0	-1.57828	0	0.0915982
MODULE_111	-1.24532	0.0862069	0.264099	-1.57713	0	0.092869
PAL_PRMT5_TARGETS_DN	0.747487	0.858998	1	-1.57701	0.00512164	0.0928442
GO_REGULATION_OF_RESPONSE_TO_WOUNDING	-1.86959	0	0.00642083	-1.5764	0	0.0934056
MODULE_368	-0.9956	0.459959	0.667394	-1.57608	0.0161074	0.0936687
MODULE_173	-1.04108	0.403259	0.572324	-1.57606	0.00661376	0.0935156
GO_CELLULAR_EXTRAVASATION	-1.86803	0.002079	0.00647426	-1.57599	0.00779221	0.0934389
KRASNOSELSKAYA_ILF3_TARGETS_UP	-1.80372	0.002079	0.0116139	-1.57594	0.00495663	0.0933192
MODULE_130	-0.999501	0.441296	0.658505	-1.57536	0.0122283	0.093875
GO_RECEPTOR_INHIBITOR_ACTIVITY	-1.43257	0.0907217	0.116595	-1.57535	0.00903614	0.0937258
GO_MONOCYTE_CHEMOTAXIS	-2.14604	0	0.000123525	-1.5751	0.0101652	0.0938504
GO_GAP_JUNCTION	1.71211	0.00785855	0.0809407	-1.57497	0.00773196	0.0938673
VERHAAK_AML_WITH_NPM1_MUTATED_UP	-2.61863	0	0	-1.57469	0	0.0940465
GSE17974_IL4_AND_ANTI_IL12_VS_UNTREATED_24H_ACT_CD4_TCELL_DN	-2.24536	0	2.09294e-05	-1.57432	0	0.0943273
GAURNIER_PSMD4_TARGETS	-2.49012	0	0	-1.57417	0.00694444	0.0943524
GSE37301_HEMATOPOIETIC_STEM_CELL_VS_CD4_TCELL_UP	-2.44566	0	0	-1.57358	0	0.0949715
GO_RESPONSE_TO_PROTOZOAN	-1.92046	0.00207469	0.00377686	-1.57315	0.0215054	0.0953711
GSE18791_CTRL_VS_NEWCASTLE_VIRUS_DC_16H_DN	-1.97599	0	0.0019517	-1.57311	0	0.0952623
MODULE_367	-1.72814	0.00607287	0.0213305	-1.57267	0.00764331	0.0956098
GSE44649_WT_VS_MIR155_KO_NAIVE_CD8_TCELL_UP	-1.67538	0	0.0307926	-1.57255	0	0.0955857
GERHOLD_RESPONSE_TO_TZD_UP	0.981646	0.497099	0.871393	-1.57243	0.00304878	0.0955722
VALK_AML_WITH_CEBPA	0.841518	0.72449	1	-1.57243	0.00981595	0.0954126
GO_REGULATION_OF_HUMORAL_IMMUNE_RESPONSE	-1.66773	0.0094518	0.0324248	-1.57242	0.00960384	0.095261
GO_REGULATION_OF_BODY_FLUID_LEVELS	1.11214	0.136187	0.65079	-1.5721	0	0.0954809
GO_MYOSIN_HEAVY_CHAIN_BINDING	-1.13205	0.308468	0.411769	-1.57189	0.0168067	0.0955982
GSE21360_TERTIARY_VS_QUATERNARY_MEMORY_CD8_TCELL_DN	-1.69379	0	0.0270757	-1.57181	0	0.0955578
GO_POSITIVE_REGULATION_OF_ION_TRANSPORT	-1.30415	0.0220884	0.208161	-1.57171	0	0.0954952
GSE21546_WT_VS_SAP1A_KO_DP_THYMOCYTES_UP	-2.43791	0	0	-1.57149	0.00104932	0.0956342
MODULE_84	-2.78286	0	0	-1.57133	0	0.0956833
LIAN_LIPA_TARGETS_3M	-3.01821	0	0	-1.57116	0.00229885	0.0957443
CROONQUIST_NRAS_SIGNALING_UP	-2.64676	0	0	-1.5711	0.0123609	0.0956684
GSE21360_SECONDARY_VS_QUATERNARY_MEMORY_CD8_TCELL_UP	-1.90883	0	0.00431156	-1.57087	0	0.095815
GO_POSITIVE_REGULATION_OF_TUMOR_NECROSIS_FACTOR_SUPERFAMILY_CYTOKINE_PRODUCTION	-2.16763	0	8.07404e-05	-1.57084	0.00570776	0.0956978
PRC1_BMI_UP.V1_DN	-1.82725	0	0.009454	-1.57042	0	0.0960805
VALK_AML_CLUSTER_11	-0.938202	0.559252	0.789737	-1.57022	0.00492005	0.0961948
WILSON_PROTEASES_AT_TUMOR_BONE_INTERFACE_UP	1.22655	0.211155	0.492182	-1.56978	0.0130719	0.0965842
MODULE_288	-2.43948	0	0	-1.56944	0.00960384	0.0968503
PID_RAS_PATHWAY	-1.46132	0.043299	0.101984	-1.56893	0.016109	0.0973458
GO_PLATELET_ALPHA_GRANULE_MEMBRANE	1.69097	0.0243902	0.0943773	-1.56892	0.00656168	0.0971921
GO_REGULATION_OF_INTERLEUKIN_8_PRODUCTION	-1.83627	0.00206612	0.00873157	-1.56874	0.00681044	0.0972335
CAIRO_LIVER_DEVELOPMENT_DN	-1.57364	0	0.0569617	-1.56851	0	0.0973857
GO_NEGATIVE_REGULATION_OF_T_CELL_MEDIATED_IMMUNITY	-2.30948	0	7.32943e-06	-1.56847	0.0107527	0.0972648
GO_CELLULAR_MONOVALENT_INORGANIC_CATION_HOMEOSTASIS	-1.67127	0.00205339	0.0316382	-1.5682	0.00108814	0.0974396
GO_T_CELL_MEDIATED_IMMUNITY	-2.14935	0	0.000117877	-1.56783	0.0125156	0.0977681
GO_REGULATION_OF_ACROSOME_REACTION	-0.616276	0.923237	1	-1.56775	0.0123796	0.0976994
GO_REGULATION_OF_CELL_KILLING	-2.41557	0	0	-1.56773	0.00463499	0.0975744
GO_POSITIVE_REGULATION_OF_IMMUNE_EFFECTOR_PROCESS	-2.18484	0	6.76048e-05	-1.56737	0	0.0979027
GNF2_TTN	-0.782533	0.767068	0.99676	-1.56737	0.0131062	0.0977445
GO_POSITIVE_REGULATION_OF_REPRODUCTIVE_PROCESS	1.30031	0.102564	0.416319	-1.56717	0.00823529	0.097855
GO_ORGANIC_HYDROXY_COMPOUND_TRANSPORT	-0.906767	0.689938	0.848165	-1.56687	0	0.098066
GO_EXOCYTOSIS	0.94315	0.641434	0.944556	-1.56674	0	0.098111
GSE42021_CD24INT_VS_CD24LOW_TCONV_THYMUS_DN	-1.92111	0	0.0037648	-1.5665	0	0.0982548
GO_MULTICELLULAR_ORGANISM_METABOLIC_PROCESS	1.04955	0.371769	0.757783	-1.56633	0.0032538	0.0983165
GO_REGULATION_OF_INFLAMMATORY_RESPONSE	-2.22072	0	3.33446e-05	-1.56632	0	0.0981764
ST_G_ALPHA_S_PATHWAY	-1.22073	0.191147	0.291672	-1.56611	0.0156863	0.0982894
TONKS_TARGETS_OF_RUNX1_RUNX1T1_FUSION_ERYTHROCYTE_DN	1.23656	0.19084	0.480054	-1.56609	0.0167131	0.0981683
GSE10325_CD4_TCELL_VS_LUPUS_CD4_TCELL_DN	-2.0456	0	0.000733485	-1.56606	0	0.0980518
NIELSEN_GIST_VS_SYNOVIAL_SARCOMA_DN	-1.21327	0.221757	0.300364	-1.56561	0.0064433	0.0984844
HUANG_DASATINIB_RESISTANCE_UP	-0.981232	0.480331	0.699531	-1.56547	0.00331126	0.0985041
CAR_IGFBP1	-1.73197	0.00402414	0.0207647	-1.56533	0.00730816	0.0985533
GSE5589_LPS_AND_IL10_VS_LPS_AND_IL6_STIM_IL6_KO_MACROPHAGE_45MIN_UP	-2.58974	0	0	-1.56529	0	0.0984582
MISSIAGLIA_REGULATED_BY_METHYLATION_UP	-1.55843	0.00591716	0.0616767	-1.56462	0	0.0992121
GSE2770_UNTREATED_VS_IL4_TREATED_ACT_CD4_TCELL_6H_UP	-1.16147	0.122	0.369268	-1.56362	0	0.10033
GO_POSITIVE_REGULATION_OF_CYTOKINE_PRODUCTION	-2.33177	0	3.90879e-06	-1.56347	0	0.100356
GSE360_T_GONDII_VS_M_TUBERCULOSIS_DC_DN	-2.12666	0	0.000192744	-1.56315	0	0.100595
PEPPER_CHRONIC_LYMPHOCYTIC_LEUKEMIA_DN	-1.00853	0.420202	0.639191	-1.56287	0.0116732	0.100754
GO_MUSCLE_MYOSIN_COMPLEX	1.2954	0.128599	0.419083	-1.56263	0.0115274	0.100896
GO_ACYLGLYCEROL_O_ACYLTRANSFERASE_ACTIVITY	-0.812451	0.770624	0.97457	-1.56256	0.00494438	0.100832
GO_POSITIVE_REGULATION_OF_DEFENSE_RESPONSE	-2.51005	0	0	-1.56232	0	0.100976
GO_IMMUNE_RESPONSE	-2.90146	0	0	-1.56212	0	0.101095
SMIRNOV_CIRCULATING_ENDOTHELIOCYTES_IN_CANCER_UP	-1.93385	0	0.0032337	-1.56192	0	0.101196
HOFMANN_MYELODYSPLASTIC_SYNDROM_HIGH_RISK_DN	-1.48792	0.055914	0.0898679	-1.56168	0.0146471	0.101353
GO_SIGNALING_ADAPTOR_ACTIVITY	-1.51809	0.0203252	0.0766182	-1.56166	0.00220507	0.101218
GSE360_L_DONOVANI_VS_M_TUBERCULOSIS_DC_DN	-2.37043	0	0	-1.56143	0	0.101351
GO_GRANULOCYTE_ACTIVATION	-1.81727	0.00423729	0.0103482	-1.56115	0.0117188	0.101575
GO_POSITIVE_REGULATION_OF_CYCLIN_DEPENDENT_PROTEIN_KINASE_ACTIVITY	1.203	0.207101	0.523501	-1.56099	0.00724638	0.101613
REACTOME_ACTIVATED_POINT_MUTANTS_OF_FGFR2	1.42199	0.0981964	0.301459	-1.56055	0.0226365	0.101979
GO_SECRETORY_GRANULE	0.939772	0.690335	0.950449	-1.56005	0	0.102475
GO_POSITIVE_REGULATION_OF_TOLL_LIKE_RECEPTOR_SIGNALING_PATHWAY	-1.47479	0.0471092	0.0959079	-1.55991	0.0213618	0.10247
GO_REGULATION_OF_PEPTIDE_TRANSPORT	-1.21303	0.0784314	0.300634	-1.55962	0.00101833	0.102664
REACTOME_CELL_SURFACE_INTERACTIONS_AT_THE_VASCULAR_WALL	-1.63872	0.00187617	0.0386696	-1.55954	0.00221729	0.102607
GO_RELAXATION_OF_MUSCLE	-1.36979	0.0923695	0.156756	-1.55954	0.0114213	0.102452
SABATES_COLORECTAL_ADENOMA_UP	1.39065	0.0240296	0.330819	-1.55922	0.00321543	0.102702
GO_REGULATION_OF_INTERLEUKIN_6_PRODUCTION	-1.64765	0.00619835	0.0366569	-1.55906	0.00215983	0.10279
GO_POSITIVE_REGULATION_OF_ERK1_AND_ERK2_CASCADE	-1.74434	0	0.0188645	-1.55891	0	0.10283
GO_OXIDIZED_NAD_BINDING	0.805982	0.72167	1	-1.55891	0.0111732	0.102675
BIOCARTA_COMP_PATHWAY	-1.24682	0.166324	0.262567	-1.55852	0.0205479	0.103027
GO_CGMP_METABOLIC_PROCESS	0.853798	0.670707	1	-1.55791	0.00777202	0.103763
SERVITJA_ISLET_HNF1A_TARGETS_DN	-1.36435	0.0344828	0.160407	-1.55778	0.00106952	0.103775
GO_REGULATION_OF_LEUKOCYTE_DEGRANULATION	-1.46061	0.0401691	0.102255	-1.55778	0.00470588	0.103622
GO_RENAL_SYSTEM_PROCESS_INVOLVED_IN_REGULATION_OF_SYSTEMIC_ARTERIAL_BLOOD_PRESSURE	0.859142	0.657744	1	-1.55769	0.011658	0.103602
GO_MUSCLE_CONTRACTION	-1.02922	0.360587	0.595944	-1.55766	0	0.10347
MUELLER_METHYLATED_IN_GLIOBLASTOMA	-1.1081	0.283702	0.449137	-1.55761	0.00616523	0.103399
MODULE_157	-1.05146	0.343373	0.553313	-1.55747	0.00218818	0.103432
GSE46606_IRF4_KO_VS_WT_UNSTIM_BCELL_DN	-1.65781	0	0.0344847	-1.55717	0	0.10364
GSE43863_NAIVE_VS_MEMORY_TH1_CD4_TCELL_D150_LCMV_UP	-1.82858	0	0.00932858	-1.55664	0	0.104145
GO_REGULATION_OF_LYMPHOCYTE_MEDIATED_IMMUNITY	-2.61934	0	0	-1.55616	0.00219539	0.104612
KIM_LRRC3B_TARGETS	-1.90026	0	0.00473584	-1.5559	0.0160643	0.10482
GO_REGULATION_OF_ADENYLATE_CYCLASE_ACTIVITY	1.15919	0.2	0.587762	-1.55583	0.0045403	0.104782
GO_POSITIVE_REGULATION_OF_INTERLEUKIN_8_SECRETION	-1.38464	0.125	0.146199	-1.55583	0.0097629	0.104626
TAKEDA_TARGETS_OF_NUP98_HOXA9_FUSION_3D_UP	-1.7276	0	0.0213354	-1.5558	0	0.104505
FERRARI_RESPONSE_TO_FENRETINIDE_UP	1.15029	0.267045	0.599705	-1.55578	0.0206986	0.104374
STEGER_ADIPOGENESIS_UP	-1.46365	0.0518359	0.101193	-1.55574	0.0140485	0.104268
GO_CELLULAR_DEFENSE_RESPONSE	-2.89793	0	0	-1.55534	0.00702576	0.104633
GSE11864_CSF1_PAM3CYS_VS_CSF1_IFNG_PAM3CYS_IN_MAC_DN	-2.23863	0	2.05903e-05	-1.5553	0	0.104524
MODULE_524	0.455036	0.998	1	-1.55521	0.011208	0.104485
REACTOME_GAMMA_CARBOXYLATION_TRANSPORT_AND_AMINO_TERMINAL_CLEAVAGE_OF_PROTEINS	-0.694798	0.843096	1	-1.55519	0.00413793	0.10437
GO_CELL_CELL_JUNCTION_ASSEMBLY	1.24661	0.109195	0.468486	-1.55455	0.00561167	0.105033
ZHANG_INTERFERON_RESPONSE	-2.2722	0	9.73509e-06	-1.55444	0.0101652	0.10504
GSE38681_WT_VS_LYL1_KO_LYMPHOID_PRIMED_MULTIPOTENT_PROGENITOR_DN	-2.55023	0	0	-1.55398	0	0.105465
GO_POSITIVE_REGULATION_OF_HORMONE_SECRETION	1.33479	0.0393701	0.385367	-1.55396	0	0.105332
GO_ARGININE_METABOLIC_PROCESS	-1.00171	0.445378	0.653947	-1.55393	0.00780234	0.105234
GSE6674_ANTI_IGM_VS_ANTI_IGM_AND_CPG_STIM_BCELL_UP	-1.41093	0.00393701	0.128794	-1.55346	0	0.105756
MIKKELSEN_ES_ICP_WITH_H3K4ME3_AND_H3K27ME3	1.19298	0.142857	0.541395	-1.55336	0.00105485	0.105765
GSE23321_CENTRAL_MEMORY_VS_NAIVE_CD8_TCELL_UP	-1.25809	0.0442105	0.249746	-1.5531	0.00103413	0.105932
WANG_THOC1_TARGETS_DN	1.71329	0.0134615	0.0803208	-1.55306	0.0147059	0.105816
HALLMARK_MYOGENESIS	1.00181	0.446465	0.83537	-1.55294	0	0.105812
GO_REGULATION_OF_GLOMERULAR_FILTRATION	1.01741	0.451098	0.812617	-1.55282	0.0195258	0.105844
MODULE_407	-1.22578	0.209877	0.285935	-1.55271	0.0174029	0.105836
LIU_VAV3_PROSTATE_CARCINOGENESIS_UP	-2.09323	0	0.000317025	-1.55257	0.00438597	0.105862
GO_POSITIVE_REGULATION_OF_MULTI_ORGANISM_PROCESS	-1.17899	0.138943	0.344896	-1.55225	0	0.106161
GO_RESPONSE_TO_TYPE_I_INTERFERON	-2.48863	0	0	-1.55211	0.00582751	0.10617
CHEN_LVAD_SUPPORT_OF_FAILING_HEART_DN	-1.7634	0	0.0163011	-1.55189	0.0131422	0.106332
GO_VIRUS_RECEPTOR_ACTIVITY	-1.83923	0	0.00852936	-1.55182	0.00455581	0.10627
GNF2_BNIP3L	-2.07893	0	0.000411135	-1.55082	0.00227015	0.107476
GO_SIGNALING_PATTERN_RECOGNITION_RECEPTOR_ACTIVITY	-1.91843	0	0.00385911	-1.55082	0.0156454	0.107333
GO_REGULATION_OF_PROTEIN_MATURATION	-1.13479	0.226721	0.407373	-1.55082	0.00220507	0.107181
GSE36527_CD69_NEG_VS_POS_TREG_CD62L_LOS_KLRG1_NEG_UP	-2.1592	0	0.000108915	-1.55052	0	0.107401
NIKOLSKY_BREAST_CANCER_20P13_AMPLICON	-1.44161	0.0865191	0.111715	-1.55033	0.00865801	0.107525
BIOCARTA_EPHA4_PATHWAY	-1.37705	0.110204	0.151275	-1.5503	0.017341	0.107399
GO_CARDIAC_CONDUCTION	1.10317	0.275049	0.666612	-1.54999	0.00221239	0.107674
GSE6259_FLT3L_INDUCED_VS_WT_SPLENIC_DC_33D1_POS_UP	-2.34739	0	4.13648e-06	-1.54987	0	0.107664
GSE34156_UNTREATED_VS_24H_NOD2_LIGAND_TREATED_MONOCYTE_DN	-2.53917	0	0	-1.54965	0	0.107826
BCAT_GDS748_UP	-1.22257	0.173278	0.289643	-1.54954	0.00818713	0.107829
GNF2_CASP1	-3.09746	0	0	-1.54947	0	0.107753
GO_TRIGLYCERIDE_CATABOLIC_PROCESS	0.909705	0.584795	0.99312	-1.54931	0.0167959	0.107804
GO_CYTOKINE_METABOLIC_PROCESS	-1.79757	0.00862069	0.0121975	-1.54929	0.0208333	0.10769
GO_RESPONSE_TO_ATP	-1.2732	0.135029	0.235654	-1.54919	0.00743494	0.107692
NADLER_OBESITY_UP	-1.84968	0	0.00771641	-1.54911	0.00813953	0.10764
GO_REGULATION_OF_T_CELL_MIGRATION	-1.61922	0.010142	0.0436015	-1.54895	0.0170828	0.107688
CERVERA_SDHB_TARGETS_1_UP	-1.08582	0.278884	0.486568	-1.54872	0.00107296	0.107832
CHR10P11	0.723513	0.909434	1	-1.54868	0.0205198	0.107745
GO_MULTICELLULAR_ORGANISMAL_WATER_HOMEOSTASIS	-0.990693	0.46124	0.678433	-1.548	0.016298	0.108511
GO_ORGANIC_CATION_TRANSPORT	-1.35152	0.0787879	0.169997	-1.54783	0.0219922	0.108577
GO_RESPONSE_TO_VIRUS	-2.13144	0	0.000170403	-1.54776	0	0.108512
MODULE_573	1.14963	0.248532	0.599557	-1.54759	0.00741656	0.108603
GO_THYROID_HORMONE_GENERATION	1.40242	0.0827068	0.314796	-1.54758	0.00869565	0.108469
GO_LYSOPHOSPHOLIPID_ACYLTRANSFERASE_ACTIVITY	-0.54037	0.980306	1	-1.54669	0.0154839	0.10947
GO_VOLTAGE_GATED_CALCIUM_CHANNEL_ACTIVITY	0.985855	0.467327	0.86342	-1.54657	0.0109756	0.109461
GSE22229_RENAL_TRANSPLANT_IMMUNOSUPP_THERAPY_VS_HEALTHY_PBMC_DN	-1.88518	0	0.00550479	-1.54639	0	0.109552
GO_AMIDE_TRANSMEMBRANE_TRANSPORTER_ACTIVITY	-1.64344	0.0147679	0.0376352	-1.54627	0.0169271	0.109561
REACTOME_MUSCLE_CONTRACTION	1.10986	0.279441	0.655494	-1.5461	0.00476758	0.109657
MEK_UP.V1_UP	-1.43703	0.006	0.11424	-1.54595	0	0.109732
GSE38304_MYC_NEG_VS_POS_GC_BCELL_UP	-1.29616	0.031185	0.215293	-1.54592	0.00102041	0.109625
GO_ANGIOGENESIS_INVOLVED_IN_WOUND_HEALING	0.760006	0.790554	1	-1.54585	0.02	0.109584
KEGG_CYTOKINE_CYTOKINE_RECEPTOR_INTERACTION	-2.20121	0	4.72715e-05	-1.54527	0	0.110202
DAZARD_UV_RESPONSE_CLUSTER_G24	1.00779	0.427221	0.826121	-1.54526	0.0188679	0.110066
GO_MULTICELLULAR_ORGANISMAL_MACROMOLECULE_METABOLIC_PROCESS	1.10485	0.280303	0.664218	-1.54492	0.00445434	0.110392
GO_LIPOXYGENASE_PATHWAY	-0.857644	0.663202	0.928806	-1.54422	0.0149051	0.111191
GO_VOLTAGE_GATED_SODIUM_CHANNEL_COMPLEX	-0.821453	0.694845	0.967313	-1.54414	0.0206897	0.111153
GSE16450_IMMATURE_VS_MATURE_NEURON_CELL_LINE_UP	-2.3822	0	0	-1.54384	0	0.111413
GO_MYOSIN_BINDING	0.800578	0.825832	1	-1.5433	0.00558036	0.112046
GO_ANION_TRANSMEMBRANE_TRANSPORTER_ACTIVITY	-1.13578	0.157371	0.40591	-1.54284	0	0.112517
GSE18791_CTRL_VS_NEWCASTLE_VIRUS_DC_18H_DN	-1.43021	0.0135922	0.117866	-1.5428	0.00104493	0.112407
WU_CELL_MIGRATION	1.11758	0.184524	0.641925	-1.54276	0	0.112311
MODULE_201	1.2366	0.147573	0.480503	-1.54273	0.00720288	0.112188
GSE21360_TERTIARY_VS_QUATERNARY_MEMORY_CD8_TCELL_UP	-1.57745	0.00193424	0.0557371	-1.54253	0	0.112322
GSE18791_CTRL_VS_NEWCASTLE_VIRUS_DC_6H_DN	-2.24659	0	2.11283e-05	-1.54243	0	0.11232
GO_CORTICAL_ACTIN_CYTOSKELETON	-1.29251	0.101266	0.218802	-1.54237	0.00676437	0.112248
GO_POSITIVE_REGULATION_OF_ENDOTHELIAL_CELL_PROLIFERATION	1.26735	0.115308	0.444667	-1.54228	0.003386	0.112211
TAKEDA_TARGETS_OF_NUP98_HOXA9_FUSION_10D_UP	-1.84083	0	0.00842146	-1.54221	0.00105485	0.112148
GSE22886_NAIVE_CD4_TCELL_VS_MONOCYTE_DN	-3.22339	0	0	-1.54219	0	0.112028
LEE_TARGETS_OF_PTCH1_AND_SUFU_DN	1.00954	0.430189	0.825587	-1.54202	0.00564334	0.112142
GNF2_SERPINB5	1.04254	0.37451	0.771067	-1.54157	0.0166453	0.11268
GO_ACTIVATION_OF_ADENYLATE_CYCLASE_ACTIVITY	1.04476	0.381226	0.767423	-1.54149	0.0218978	0.112651
GO_REGULATION_OF_EXCRETION	0.806858	0.77	1	-1.54147	0.0180879	0.112521
GO_CELL_JUNCTION_ASSEMBLY	1.01843	0.40824	0.810429	-1.54135	0	0.112545
GO_POSITIVE_REGULATION_OF_LEUKOCYTE_DEGRANULATION	-1.22494	0.213552	0.286813	-1.54075	0.0157274	0.113253
GO_REGULATION_OF_SMOOTH_MUSCLE_CELL_APOPTOTIC_PROCESS	-1.13437	0.291165	0.408284	-1.54075	0.0216509	0.113102
GSE22886_NAIVE_CD8_TCELL_VS_NEUTROPHIL_DN	-2.22101	0	3.34177e-05	-1.54073	0	0.112978
GO_CELLULAR_RESPONSE_TO_PH	-1.41335	0.0929293	0.127618	-1.54069	0.0116429	0.112908
MODULE_238	-1.73926	0	0.0196874	-1.54019	0.00106045	0.113413
GNF2_HPX	-1.26589	0.0628931	0.242132	-1.53942	0.00319829	0.114358
GSE44649_WT_VS_MIR155_KO_NAIVE_CD8_TCELL_DN	-1.10143	0.225681	0.459943	-1.53844	0	0.115639
GO_ALCOHOL_TRANSMEMBRANE_TRANSPORTER_ACTIVITY	1.14011	0.312618	0.608963	-1.53838	0.0188172	0.115591
GO_SYNAPTIC_VESICLE_CYCLE	1.34001	0.0614203	0.378804	-1.5381	0.00110132	0.115807
GSE37533_PPARG1_FOXP3_VS_FOXP3_TRANSDUCED_CD4_TCELL_DN	-2.55969	0	0	-1.538	0	0.115764
GO_ACTIN_MEDIATED_CELL_CONTRACTION	1.14957	0.220472	0.598959	-1.53737	0.00684151	0.116504
MULLIGHAN_MLL_SIGNATURE_1_DN	2.13184	0	0.00225718	-1.53721	0.00102041	0.116558
BIOCARTA_EXTRINSIC_PATHWAY	-1.03827	0.401709	0.578453	-1.53719	0.0255682	0.116434
GNF2_LCAT	-1.17216	0.15102	0.354503	-1.53668	0.00541712	0.117012
GSE25085_FETAL_LIVER_VS_FETAL_BM_SP4_THYMIC_IMPLANT_DN	-1.87391	0	0.00614622	-1.53646	0	0.11718
GO_REGULATION_OF_CALCIUM_ION_DEPENDENT_EXOCYTOSIS	1.14601	0.204633	0.603104	-1.53644	0.00556174	0.117054
GSE18791_UNSTIM_VS_NEWCATSLE_VIRUS_DC_18H_DN	-1.72345	0	0.0220516	-1.53644	0	0.116904
BIOCARTA_PLATELETAPP_PATHWAY	1.36686	0.108209	0.347759	-1.53644	0.027027	0.116753
GSE24142_EARLY_THYMIC_PROGENITOR_VS_DN2_THYMOCYTE_ADULT_UP	-1.75	0	0.0180414	-1.53635	0	0.116742
CHR13Q34	0.60336	0.972171	1	-1.53634	0.0109091	0.116603
GO_CELL_CORTEX_PART	-1.25163	0.0747475	0.256793	-1.5363	0.00107643	0.116503
GNF2_CD97	-2.42628	0	0	-1.53606	0.0157195	0.116723
KONDO_EZH2_TARGETS	-1.20609	0.07	0.309247	-1.53589	0	0.116839
GSE12392_WT_VS_IFNB_KO_CD8A_NEG_SPLEEN_DC_DN	-1.95209	0	0.00264631	-1.53586	0	0.116732
MANTOVANI_NFKB_TARGETS_UP	-1.28567	0.128834	0.224184	-1.53564	0.011655	0.116892
GO_RESPONSE_TO_BIOTIC_STIMULUS	-2.14232	0	0.000140214	-1.53562	0	0.116784
GO_ADAPTIVE_IMMUNE_RESPONSE	-3.05444	0	0	-1.53544	0	0.116881
GO_CYCLIC_NUCLEOTIDE_MEDIATED_SIGNALING	1.25957	0.138783	0.45213	-1.53541	0.0105386	0.116782
GO_ACTIVE_ION_TRANSMEMBRANE_TRANSPORTER_ACTIVITY	-1.3036	0.0555556	0.208384	-1.53497	0	0.117308
GO_ACID_SECRETION	1.0026	0.437624	0.834596	-1.53465	0.00567537	0.117598
GO_POSITIVE_REGULATION_OF_ANTIGEN_PROCESSING_AND_PRESENTATION	-1.53738	0.0407332	0.0691748	-1.53455	0.021398	0.117579
GO_COPULATION	-0.696762	0.87247	1	-1.53426	0.0192837	0.117831
MODULE_440	1.49587	0.0379242	0.231107	-1.53372	0.0183486	0.118423
KIM_PTEN_TARGETS_UP	0.857107	0.657033	1	-1.53336	0.0184211	0.11884
GSE27786_CD8_TCELL_VS_NKTCELL_DN	-1.29361	0.030303	0.217614	-1.53324	0	0.118846
GOLUB_ALL_VS_AML_DN	-1.4419	0.0476191	0.111632	-1.53311	0.0169271	0.118906
PARK_TRETINOIN_RESPONSE_AND_PML_RARA_FUSION	-1.60329	0.0177515	0.0480779	-1.53297	0.013285	0.118963
REACTOME_SYNTHESIS_OF_PC	-1.22639	0.211207	0.285469	-1.53292	0.0271669	0.11888
REACTOME_TRANSMEMBRANE_TRANSPORT_OF_SMALL_MOLECULES	-1.15842	0.0866935	0.374021	-1.53292	0	0.118733
GSE4590_SMALL_VS_LARGE_PRE_BCELL_DN	-1.87744	0	0.00594432	-1.53282	0.00412371	0.118721
RICKMAN_HEAD_AND_NECK_CANCER_F	0.858388	0.713163	1	-1.5326	0.0109356	0.118886
KAECH_NAIVE_VS_DAY15_EFF_CD8_TCELL_DN	-2.28979	0	6.89362e-06	-1.53252	0	0.118846
WALLACE_PROSTATE_CANCER_RACE_UP	-2.83491	0	0	-1.53152	0	0.120139
GO_TRANSFERASE_ACTIVITY_TRANSFERRING_AMINO_ACYL_GROUPS	0.861557	0.685259	1	-1.5313	0.0187919	0.120303
GO_ALKALI_METAL_ION_BINDING	-0.92271	0.563126	0.820242	-1.53127	0.0261519	0.120192
GSE22140_GERMFREE_VS_SPF_MOUSE_CD4_TCELL_UP	-2.44482	0	0	-1.53113	0	0.120235
HORIUCHI_WTAP_TARGETS_UP	-1.4209	0.00190476	0.123208	-1.53099	0	0.120292
GSE3982_DC_VS_NKCELL_UP	-1.18945	0.0934959	0.330498	-1.53095	0	0.120204
AKT_UP_MTOR_DN.V1_UP	-1.20753	0.108365	0.3073	-1.53045	0.00103093	0.120728
GO_NEGATIVE_REGULATION_OF_REGULATED_SECRETORY_PATHWAY	-0.973691	0.48419	0.715931	-1.53032	0.0169935	0.120779
KEGG_DRUG_METABOLISM_CYTOCHROME_P450	0.986273	0.494781	0.862958	-1.53019	0.0150188	0.120825
GSE16450_IMMATURE_VS_MATURE_NEURON_CELL_LINE_12H_IFNA_STIM_UP	-1.96803	0	0.00216377	-1.53004	0	0.120909
GO_RESPONSE_TO_INSECTICIDE	1.1142	0.355805	0.646922	-1.53002	0.0222841	0.120778
REN_ALVEOLAR_RHABDOMYOSARCOMA_UP	1.02969	0.392276	0.790591	-1.52988	0	0.120834
GO_REGULATION_OF_INNATE_IMMUNE_RESPONSE	-2.25848	0	1.25768e-05	-1.52983	0	0.120761
REACTOME_INITIAL_TRIGGERING_OF_COMPLEMENT	-1.28529	0.178723	0.224471	-1.52967	0.0173103	0.12084
GO_CELL_CHEMOTAXIS	-2.27432	0	6.5401e-06	-1.52948	0.00105263	0.12099
GO_PHOTORECEPTOR_OUTER_SEGMENT_MEMBRANE	0.97854	0.496032	0.876615	-1.52937	0.0244565	0.120981
GSE21379_WT_VS_SAP_KO_TFH_CD4_TCELL_UP	-1.13963	0.172962	0.400782	-1.52927	0	0.120963
EINAV_INTERFERON_SIGNATURE_IN_CANCER	-2.12405	0	0.000197556	-1.52922	0.0110565	0.1209
GO_POSITIVE_REGULATION_OF_MYELOID_LEUKOCYTE_MEDIATED_IMMUNITY	-1.34198	0.115079	0.177758	-1.52921	0.00816326	0.120766
GSE39110_UNTREATED_VS_IL2_TREATED_CD8_TCELL_DAY6_POST_IMMUNIZATION_UP	-2.2531	0	1.22737e-05	-1.52903	0.00101317	0.120894
CROMER_TUMORIGENESIS_DN	-1.23276	0.152475	0.27805	-1.529	0.0145631	0.120789
MODULE_223	-1.69249	0	0.0272768	-1.52899	0	0.120659
GOTZMANN_EPITHELIAL_TO_MESENCHYMAL_TRANSITION_UP	1.12779	0.226453	0.625462	-1.52886	0.003367	0.120678
GO_CELL_ACTIVATION	-2.2173	0	3.30553e-05	-1.52879	0	0.120632
GO_APICAL_PART_OF_CELL	-1.06644	0.270916	0.522895	-1.52856	0	0.120822
GSE36392_TYPE_2_MYELOID_VS_NEUTROPHIL_IL25_TREATED_LUNG_UP	-1.31148	0.0308008	0.202219	-1.5282	0	0.121235
GO_HEMOSTASIS	1.11176	0.202381	0.651682	-1.52803	0	0.121349
GO_MEMBRANE_REPOLARIZATION	-1.56564	0.0365854	0.0593743	-1.528	0.0202977	0.121254
GNF2_MYL3	1.43238	0.0553435	0.291191	-1.5279	0.0101138	0.121259
GO_REGULATION_OF_MACROPHAGE_CYTOKINE_PRODUCTION	-1.29899	0.158111	0.212744	-1.52784	0.0253521	0.121203
GNF2_ICAM3	-2.13217	0	0.000168832	-1.52763	0.0146699	0.121343
GO_RESPONSE_TO_OSMOTIC_STRESS	-1.3332	0.0679012	0.184671	-1.52761	0.00576701	0.121235
MATZUK_EARLY_ANTRAL_FOLLICLE	1.28609	0.156673	0.429191	-1.52744	0.0264624	0.12139
REACTOME_HEMOSTASIS	-0.946905	0.653386	0.772974	-1.52739	0	0.121311
GSE36476_CTRL_VS_TSST_ACT_72H_MEMORY_CD4_TCELL_OLD_UP	-1.07875	0.259557	0.498588	-1.52705	0	0.121631
GSE1432_CTRL_VS_IFNG_24H_MICROGLIA_DN	-2.57202	0	0	-1.52657	0	0.122194
KEGG_TYPE_I_DIABETES_MELLITUS	-1.89744	0	0.00488504	-1.52656	0.0153649	0.122057
HOFFMANN_LARGE_TO_SMALL_PRE_BII_LYMPHOCYTE_DN	-1.17087	0.186192	0.356177	-1.52573	0.00782123	0.12312
GSE10325_CD4_TCELL_VS_MYELOID_DN	-2.83439	0	0	-1.52517	0.00206398	0.123731
GO_CONTRACTILE_FIBER	1.03797	0.351738	0.777141	-1.5251	0.00102354	0.123696
GO_NEGATIVE_REGULATION_OF_INTERLEUKIN_8_PRODUCTION	-1.14479	0.284519	0.392959	-1.52509	0.0300546	0.123551
GSE5589_LPS_VS_LPS_AND_IL10_STIM_IL10_KO_MACROPHAGE_45MIN_DN	-1.93625	0	0.0031356	-1.52445	0	0.12436
GO_VOLTAGE_GATED_ION_CHANNEL_ACTIVITY	-0.971713	0.525253	0.719771	-1.52432	0	0.124403
OZANNE_AP1_TARGETS_UP	-0.654504	0.900634	1	-1.52431	0.0213618	0.12427
HALLMARK_HEME_METABOLISM	-2.20003	0	4.71742e-05	-1.52386	0	0.124809
GO_FATTY_ACID_DERIVATIVE_TRANSPORT	-0.730597	0.857724	1	-1.52385	0.0219072	0.124678
GO_AMMONIUM_TRANSMEMBRANE_TRANSPORT	-1.12808	0.287234	0.417697	-1.52342	0.0221066	0.125205
GSE9509_LPS_VS_LPS_AND_IL10_STIM_IL10_KO_MACROPHAGE_20MIN_UP	1.87846	0	0.0288641	-1.52339	0	0.125104
PID_TXA2PATHWAY	-1.1177	0.270876	0.435165	-1.5233	0.00452489	0.125091
GO_POSITIVE_REGULATION_OF_EXTRINSIC_APOPTOTIC_SIGNALING_PATHWAY_IN_ABSENCE_OF_LIGAND	1.03451	0.425101	0.783486	-1.5229	0.0262794	0.125534
GSE3720_LPS_VS_PMA_STIM_VD2_GAMMADELTA_TCELL_UP	-1.73639	0	0.0201381	-1.52262	0.00209864	0.125802
NOJIMA_SFRP2_TARGETS_DN	-1.44573	0.0449898	0.109595	-1.52254	0.0193939	0.125756
GO_DEFENSE_RESPONSE_TO_OTHER_ORGANISM	-2.42837	0	0	-1.52253	0	0.125631
MODULE_138	-0.980891	0.487179	0.700172	-1.52249	0.00660793	0.125544
GSE7460_CD8_TCELL_VS_TREG_ACT_UP	-1.67804	0	0.0302829	-1.52201	0	0.1261
REACTOME_TRANSPORT_OF_GLUCOSE_AND_OTHER_SUGARS_BILE_SALTS_AND_ORGANIC_ACIDS_METAL_IONS_AND_AMINE_COMPOUNDS	-1.27553	0.0912863	0.233503	-1.52195	0.00223964	0.126038
GNF2_ITGB2	-2.6242	0	0	-1.5217	0.0114548	0.126277
GO_POSITIVE_REGULATION_OF_LEUKOCYTE_MEDIATED_IMMUNITY	-2.3255	0	3.86155e-06	-1.52154	0.00554939	0.126368
MODULE_563	1.01211	0.427711	0.821137	-1.52066	0.0228802	0.127533
GO_PHOTOTRANSDUCTION_VISIBLE_LIGHT	-0.68907	0.856855	1	-1.5206	0.0134953	0.127472
GO_REGULATION_OF_CYTOSOLIC_CALCIUM_ION_CONCENTRATION	-1.39874	0.00772201	0.136627	-1.52044	0	0.127567
GO_PHOTORECEPTOR_CELL_MAINTENANCE	0.711379	0.894	1	-1.51974	0.0142857	0.128478
MODULE_96	-1.7453	0.00400802	0.0187459	-1.51955	0.0317662	0.128602
GSE14413_UNSTIM_VS_IFNB_STIM_RAW264_CELLS_DN	-1.1435	0.205339	0.394595	-1.5193	0.00107181	0.128828
MODULE_117	-2.07107	0	0.000479387	-1.51915	0	0.12892
GO_INTEGRIN_MEDIATED_SIGNALING_PATHWAY	-1.31678	0.0531697	0.198159	-1.51912	0.00332226	0.128825
GO_MYELOID_CELL_ACTIVATION_INVOLVED_IN_IMMUNE_RESPONSE	-1.55404	0.0149573	0.0632627	-1.51896	0.0177725	0.128924
GSE2770_TGFB_AND_IL4_ACT_VS_ACT_CD4_TCELL_2H_DN	-2.38161	0	0	-1.51894	0.00102564	0.128802
CAIRO_HEPATOBLASTOMA_DN	-1.0338	0.335953	0.587472	-1.51888	0	0.128745
GO_BRUSH_BORDER_MEMBRANE	-0.751337	0.897087	1	-1.51877	0.00698487	0.12877
GO_RESPONSE_TO_INTERLEUKIN_1	-1.56988	0.00191939	0.0580129	-1.5187	0.00213447	0.128719
GO_REGULATION_OF_LYASE_ACTIVITY	1.12353	0.272917	0.633181	-1.51867	0.0110375	0.128608
GO_NEUTRAL_LIPID_METABOLIC_PROCESS	-1.28521	0.0907258	0.224441	-1.5185	0.00648649	0.128716
GSE34006_WT_VS_A2AR_KO_TREG_DN	-2.23424	0	2.03082e-05	-1.51849	0	0.128577
GO_NEGATIVE_REGULATION_OF_VIRAL_GENOME_REPLICATION	-2.12657	0	0.000192417	-1.51838	0.00958084	0.128592
VALK_AML_WITH_EVI1	1.56301	0.0308285	0.176974	-1.51815	0.0168831	0.128773
ACEVEDO_FGFR1_TARGETS_IN_PROSTATE_CANCER_MODEL_DN	1.53903	0	0.193799	-1.51809	0	0.128722
GNF2_MLF1	1.60697	0.0114286	0.145032	-1.51808	0.0126582	0.128577
MODULE_202	-1.0743	0.323467	0.507356	-1.51808	0.0166453	0.128435
KEGG_GLYCOSAMINOGLYCAN_BIOSYNTHESIS_KERATAN_SULFATE	-0.564853	0.962343	1	-1.51779	0.0287582	0.128722
AZARE_NEOPLASTIC_TRANSFORMATION_BY_STAT3_UP	-1.26135	0.0927022	0.24665	-1.51765	0.00327154	0.128769
GO_REGULATION_OF_INTERLEUKIN_4_PRODUCTION	-1.70778	0.00401606	0.0247467	-1.51763	0.0223602	0.128667
GSE11057_NAIVE_VS_EFF_MEMORY_CD4_TCELL_DN	-2.42238	0	0	-1.51754	0	0.128667
GO_MONOCARBOXYLIC_ACID_TRANSPORT	0.8699	0.776447	1	-1.51732	0.00108108	0.128873
GO_INTERCALATED_DISC	-0.936265	0.578093	0.793423	-1.51715	0.0117647	0.129009
GO_PHOSPHOLIPASE_C_ACTIVATING_G_PROTEIN_COUPLED_RECEPTOR_SIGNALING_PATHWAY	-0.988788	0.459677	0.682403	-1.51703	0.0144605	0.129075
GSE2770_TGFB_AND_IL4_VS_IL4_TREATED_ACT_CD4_TCELL_2H_UP	-1.23695	0.0644531	0.273974	-1.51677	0.00104058	0.12933
KEGG_NEUROACTIVE_LIGAND_RECEPTOR_INTERACTION	-1.46715	0.00197239	0.0997152	-1.51642	0	0.129732
PETRETTO_CARDIAC_HYPERTROPHY	-0.910708	0.61978	0.842212	-1.51633	0.016109	0.12972
MODULE_411	-1.00401	0.450199	0.648891	-1.51633	0.00457143	0.129577
GSE26030_UNSTIM_VS_RESTIM_TH17_DAY5_POST_POLARIZATION_DN	-1.60912	0	0.0464143	-1.51631	0	0.129457
GO_MAIN_AXON	-1.3186	0.0873181	0.19674	-1.51618	0.0114416	0.129528
PICCALUGA_ANGIOIMMUNOBLASTIC_LYMPHOMA_UP	-1.56318	0	0.0600369	-1.51545	0	0.13047
GSE22886_NAIVE_TCELL_VS_MONOCYTE_DN	-3.10444	0	0	-1.51539	0	0.130427
GO_T_CELL_ACTIVATION_INVOLVED_IN_IMMUNE_RESPONSE	-2.40434	0	0	-1.51537	0.00589623	0.130313
GO_DETECTION_OF_MOLECULE_OF_BACTERIAL_ORIGIN	-1.68221	0.0177866	0.0294432	-1.51487	0.0179063	0.130969
GO_PHOSPHOLIPID_CATABOLIC_PROCESS	-1.34817	0.105058	0.17276	-1.51481	0.0252404	0.130909
MODULE_241	-1.84576	0	0.00801886	-1.5148	0.0102157	0.130774
REACTOME_P2Y_RECEPTORS	-1.67612	0.0246914	0.030613	-1.51476	0.0179806	0.130682
GSE3982_DC_VS_TH2_UP	-2.03722	0	0.000825343	-1.51467	0.00208117	0.130653
DAVICIONI_PAX_FOXO1_SIGNATURE_IN_ARMS_UP	1.1784	0.196565	0.562488	-1.51454	0.00681818	0.13069
CHEMELLO_SOLEUS_VS_EDL_MYOFIBERS_DN	-0.651753	0.921109	1	-1.51441	0.0287958	0.130736
GO_CYTOKINE_RECEPTOR_ACTIVITY	-2.20352	0	4.73692e-05	-1.5142	0.00439078	0.130905
GO_RENAL_SYSTEM_PROCESS_INVOLVED_IN_REGULATION_OF_BLOOD_VOLUME	0.897598	0.596899	1	-1.51412	0.0149254	0.130865
KRAS.LUNG_UP.V1_UP	-1.72239	0	0.0222138	-1.51412	0.0043057	0.130723
GSE11961_MARGINAL_ZONE_BCELL_VS_MEMORY_BCELL_DAY7_DN	1.39771	0.0133588	0.320312	-1.51374	0	0.131165
GO_MULTICELLULAR_ORGANISMAL_SIGNALING	1.00408	0.429719	0.832512	-1.5136	0.00531915	0.131227
GO_POSITIVE_REGULATION_OF_RESPONSE_TO_EXTERNAL_STIMULUS	-2.16336	0	9.89873e-05	-1.51332	0	0.131524
MODULE_5	-1.93375	0	0.00323162	-1.51326	0	0.131485
GSE3982_EOSINOPHIL_VS_MAST_CELL_UP	-1.66265	0	0.0334718	-1.5132	0	0.13142
GSE3720_UNSTIM_VS_LPS_STIM_VD2_GAMMADELTA_TCELL_DN	-1.74711	0	0.0184325	-1.51311	0.00105042	0.131407
GO_MEMBRANE_DEPOLARIZATION	0.86343	0.726721	1	-1.51263	0.0114679	0.132023
GO_REGULATION_OF_SMOOTH_MUSCLE_CONTRACTION	1.50231	0.0340681	0.225274	-1.51256	0.00808314	0.131988
GO_ETHANOL_METABOLIC_PROCESS	-0.65483	0.882231	1	-1.51224	0.020202	0.132288
GSE2585_AIRE_KO_VS_WT_CD80_LOW_MTEC_UP	-1.43312	0	0.116262	-1.51204	0.00103734	0.132449
CHR3P26	1.40981	0.0836576	0.308805	-1.51184	0.027668	0.132626
GO_REGULATION_OF_MUSCLE_CONTRACTION	1.27237	0.0695652	0.440942	-1.51127	0.00104603	0.133349
GO_ACTIN_MYOSIN_FILAMENT_SLIDING	1.14226	0.264591	0.60749	-1.51123	0.0133172	0.133252
GO_REGULATION_OF_CELLULAR_PH	-1.52072	0.0083682	0.0755955	-1.51088	0.00445931	0.13368
GO_REGULATION_OF_SMOOTH_MUSCLE_CELL_MIGRATION	-1.27833	0.117284	0.230832	-1.51062	0.00920598	0.133952
GSE17974_IL4_AND_ANTI_IL12_VS_UNTREATED_48H_ACT_CD4_TCELL_DN	-2.10378	0	0.000254816	-1.51039	0	0.134157
GO_SECRETION_BY_CELL	-1.2459	0.0275591	0.263485	-1.51015	0	0.134365
GNF2_CDH3	1.349	0.0983607	0.371885	-1.51008	0.0213568	0.134331
KATSANOU_ELAVL1_TARGETS_UP	-1.42042	0.00816326	0.123532	-1.50948	0.00104493	0.13509
GSE360_DC_VS_MAC_M_TUBERCULOSIS_UP	-1.694	0	0.0270499	-1.50927	0	0.135291
GSE2706_2H_VS_8H_R848_STIM_DC_DN	-1.9816	0	0.00184537	-1.50915	0.00104493	0.135359
GO_POSITIVE_REGULATION_OF_INTERLEUKIN_4_PRODUCTION	-1.69049	0.0116505	0.0276868	-1.50874	0.0196592	0.135871
GSE3982_DC_VS_NEUTROPHIL_DN	-1.47639	0	0.0951601	-1.50867	0	0.135828
GSE11961_FOLLICULAR_BCELL_VS_MARGINAL_ZONE_BCELL_UP	-1.14455	0.176113	0.393344	-1.50865	0	0.135715
GO_CYTOKINE_PRODUCTION	-2.40064	0	0	-1.50853	0.00218579	0.135755
DELASERNA_TARGETS_OF_MYOD_AND_SMARCA4	1.32126	0.131931	0.395661	-1.50853	0.031339	0.135611
MODULE_301	-1.8117	0	0.0108314	-1.50847	0.00634921	0.135549
GO_ANATOMICAL_STRUCTURE_MATURATION	-1.03899	0.381818	0.576903	-1.50844	0.0196802	0.135466
GO_PYRIMIDINE_CONTAINING_COMPOUND_TRANSMEMBRANE_TRANSPORT	-1.01496	0.434694	0.625788	-1.50819	0.0370879	0.135729
GO_SULFUR_COMPOUND_TRANSPORT	-0.955714	0.552083	0.753353	-1.50812	0.0272953	0.13571
GO_MYELOID_LEUKOCYTE_MEDIATED_IMMUNITY	-1.22886	0.177291	0.282321	-1.50796	0.0203837	0.135818
GSE14000_4H_VS_16H_LPS_DC_TRANSLATED_RNA_UP	-1.68175	0	0.0295314	-1.50781	0	0.1359
CERVERA_SDHB_TARGETS_2	-1.15332	0.177215	0.381541	-1.50778	0.00653595	0.135798
GO_IMMUNE_EFFECTOR_PROCESS	-2.61686	0	0	-1.50777	0	0.135659
GSE18281_SUBCAPSULAR_CORTICAL_REGION_VS_WHOLE_MEDULLA_THYMUS_DN	0.972329	0.541825	0.886492	-1.50755	0.00312826	0.135881
GSE37605_TREG_VS_TCONV_C57BL6_FOXP3_FUSION_GFP_DN	-2.07778	0	0.000416994	-1.50714	0	0.136392
GSE3982_BCELL_VS_CENT_MEMORY_CD4_TCELL_DN	-1.18553	0.102823	0.336519	-1.50697	0.00102564	0.136509
GSE24142_EARLY_THYMIC_PROGENITOR_VS_DN2_THYMOCYTE_UP	-2.02337	0	0.00101982	-1.50683	0	0.136567
GSE2405_HEAT_KILLED_LYSATE_VS_LIVE_A_PHAGOCYTOPHILUM_STIM_NEUTROPHIL_24H_UP	-1.57149	0.00208333	0.0576446	-1.50676	0.00102459	0.136525
GO_REGULATION_OF_MAST_CELL_ACTIVATION	-1.06006	0.361829	0.536431	-1.50646	0.023753	0.136879
GO_REGULATION_OF_RENAL_SYSTEM_PROCESS	1.19938	0.21875	0.5302	-1.50606	0.0138539	0.137337
REACTOME_CLASS_A1_RHODOPSIN_LIKE_RECEPTORS	-2.21023	0	3.79193e-05	-1.50606	0	0.137195
QI_PLASMACYTOMA_UP	-2.35436	0	0	-1.50579	0	0.137471
TONKS_TARGETS_OF_RUNX1_RUNX1T1_FUSION_HSC_DN	-1.80327	0	0.0116465	-1.50579	0	0.13733
MODULE_121	-1.38031	0.0365112	0.149208	-1.50559	0.00856531	0.1375
HUTTMANN_B_CLL_POOR_SURVIVAL_DN	-1.16493	0.217484	0.364689	-1.50546	0.0124434	0.137521
GSE37301_CD4_TCELL_VS_GRANULOCYTE_MONOCYTE_PROGENITOR_UP	-1.80664	0	0.0113289	-1.50521	0.00103199	0.1378
KAECH_NAIVE_VS_MEMORY_CD8_TCELL_DN	-2.22811	0	2.84481e-05	-1.50492	0	0.138083
GSE32533_MIR17_KO_VS_MIR17_OVEREXPRESS_ACT_CD4_TCELL_UP	-2.31464	0	7.45801e-06	-1.50449	0	0.138616
REACTOME_CREATION_OF_C4_AND_C2_ACTIVATORS	-0.789269	0.699387	0.992371	-1.50415	0.0270655	0.139026
GO_POSITIVE_REGULATION_OF_SMOOTH_MUSCLE_CONTRACTION	1.34277	0.0971429	0.378417	-1.50389	0.02375	0.139322
GO_REGULATION_OF_MEMBRANE_REPOLARIZATION	0.865656	0.668571	1	-1.50374	0.0189633	0.139397
GSE28737_WT_VS_BCL6_HET_FOLLICULAR_BCELL_DN	-1.88594	0	0.00547833	-1.50364	0.00103093	0.139397
REACTOME_AMINE_COMPOUND_SLC_TRANSPORTERS	-1.46245	0.0663812	0.101603	-1.50357	0.0240642	0.13934
REACTOME_IL1_SIGNALING	-1.17832	0.207424	0.345848	-1.50346	0.0167665	0.139374
CHEN_LVAD_SUPPORT_OF_FAILING_HEART_UP	1.50961	0.0169811	0.219942	-1.50342	0.00327511	0.139284
GO_KERATAN_SULFATE_BIOSYNTHETIC_PROCESS	1.11232	0.305243	0.65043	-1.50337	0.0217114	0.13922
GO_GABA_RECEPTOR_ACTIVITY	1.3105	0.143678	0.406047	-1.50333	0.0294511	0.139156
FIGUEROA_AML_METHYLATION_CLUSTER_5_DN	-1.94085	0	0.00296726	-1.50258	0.00721154	0.140253
ONO_AML1_TARGETS_DN	-2.34066	0	4.01941e-06	-1.50224	0.00866337	0.140664
GO_OXIDOREDUCTASE_ACTIVITY_ACTING_ON_PEROXIDE_AS_ACCEPTOR	0.965225	0.507782	0.898322	-1.5021	0.0149813	0.140725
GSE29949_MICROGLIA_BRAIN_VS_CD8_NEG_DC_SPLEEN_DN	-1.19211	0.119658	0.326834	-1.50204	0.00104167	0.140692
GO_NEGATIVE_REGULATION_OF_ALPHA_BETA_T_CELL_ACTIVATION	-1.65606	0.0146751	0.034765	-1.50194	0.0244845	0.140704
REACTOME_EFFECTS_OF_PIP2_HYDROLYSIS	-1.48932	0.0345572	0.0891937	-1.50174	0.0285006	0.140875
GSE4590_SMALL_VS_LARGE_PRE_BCELL_UP	-2.23639	0	2.04014e-05	-1.50166	0	0.140863
GSE3982_NEUTROPHIL_VS_NKCELL_UP	-2.17214	0	7.92309e-05	-1.50165	0	0.140744
GO_TISSUE_REGENERATION	1.15452	0.237817	0.594995	-1.50156	0.0148912	0.140739
GSE36888_STAT5_AB_KNOCKIN_VS_WT_TCELL_IL2_TREATED_17H_DN	-2.28494	0	6.76563e-06	-1.50155	0.00103413	0.140623
GSE32986_CURDLAN_LOWDOSE_VS_CURDLAN_HIGHDOSE_STIM_DC_DN	-1.89803	0	0.00484841	-1.50131	0	0.140904
DURAND_STROMA_S_UP	-1.40071	0.00578035	0.135495	-1.50108	0	0.141157
GO_G_PROTEIN_COUPLED_CHEMOATTRACTANT_RECEPTOR_ACTIVITY	-2.47147	0	0	-1.50104	0.0221066	0.14107
GSE13411_NAIVE_VS_MEMORY_BCELL_UP	1.34686	0.015534	0.374287	-1.50094	0.0010582	0.141066
RUTELLA_RESPONSE_TO_HGF_UP	-1.90313	0	0.00457602	-1.50091	0	0.140961
GO_VASCULAR_PROCESS_IN_CIRCULATORY_SYSTEM	1.34011	0.0196464	0.379214	-1.50089	0	0.140861
GSE14000_UNSTIM_VS_4H_LPS_DC_TRANSLATED_RNA_DN	-2.16085	0	0.000107368	-1.50076	0	0.140897
GO_REGULATION_OF_SYSTEMIC_ARTERIAL_BLOOD_PRESSURE	0.969677	0.49703	0.890535	-1.5007	0.00897868	0.140855
CHR4Q35	-1.07631	0.353535	0.503046	-1.5007	0.021164	0.14071
MARSON_FOXP3_TARGETS_UP	-1.67189	0.00625	0.031532	-1.50052	0.0124153	0.140866
GO_CEREBELLAR_GRANULAR_LAYER_DEVELOPMENT	-1.16501	0.2749	0.36458	-1.50037	0.0338983	0.140979
STAMBOLSKY_TARGETS_OF_MUTATED_TP53_DN	-2.04913	0	0.000696388	-1.50036	0.00962696	0.140856
GSE40274_CTRL_VS_FOXP3_AND_IRF4_TRANSDUCED_ACTIVATED_CD4_TCELL_UP	-1.54818	0.00395257	0.0653768	-1.50017	0	0.141035
GSE37533_PPARG1_FOXP3_VS_FOXP3_TRANSDUCED_CD4_TCELL_PIOGLITAZONE_TREATED_UP	-2.17868	0	7.65547e-05	-1.50016	0.00206186	0.140907
GSE24634_TEFF_VS_TCONV_DAY7_IN_CULTURE_DN	-2.35483	0	0	-1.49984	0	0.141307
SENGUPTA_NASOPHARYNGEAL_CARCINOMA_DN	-1.21125	0.0718563	0.302439	-1.49918	0	0.142274
GO_REGULATION_OF_CHEMOTAXIS	-1.56718	0	0.0588828	-1.49911	0	0.142244
GO_UNSATURATED_FATTY_ACID_BIOSYNTHETIC_PROCESS	-0.94101	0.577167	0.784525	-1.49905	0.00815851	0.142196
GO_INTERFERON_GAMMA_MEDIATED_SIGNALING_PATHWAY	-2.40891	0	0	-1.49905	0.0155131	0.142063
GO_GLUTAMINE_FAMILY_AMINO_ACID_CATABOLIC_PROCESS	1.03948	0.378431	0.774274	-1.49854	0.025974	0.142737
ICHIBA_GRAFT_VERSUS_HOST_DISEASE_D7_DN	-1.16655	0.209709	0.362696	-1.49853	0.0210396	0.14261
WANG_TARGETS_OF_MLL_CBP_FUSION_UP	-1.09547	0.302128	0.470519	-1.49798	0.0145808	0.143422
GO_DENDRITIC_SHAFT	-1.02544	0.393281	0.60381	-1.49791	0.0205066	0.143388
GSE22886_NAIVE_BCELL_VS_BLOOD_PLASMA_CELL_UP	-1.40872	0.00204918	0.130402	-1.49773	0	0.143556
GO_MOVEMENT_IN_ENVIRONMENT_OF_OTHER_ORGANISM_INVOLVED_IN_SYMBIOTIC_INTERACTION	-1.88312	0	0.00562447	-1.49741	0.00892857	0.143902
SERVITJA_LIVER_HNF1A_TARGETS_DN	-1.28383	0.0576132	0.225634	-1.4974	0.00106952	0.14377
MALIK_REPRESSED_BY_ESTROGEN	-0.631439	0.910788	1	-1.49737	0.0306407	0.143674
GSE22886_NAIVE_BCELL_VS_MONOCYTE_DN	-2.95909	0	0	-1.49735	0	0.143568
GAUSSMANN_MLL_AF4_FUSION_TARGETS_D_UP	1.21872	0.16763	0.501976	-1.49733	0.0173267	0.143458
GO_SARCOPLASM	0.823927	0.785851	1	-1.49725	0.00784753	0.143454
GO_POSITIVE_REGULATION_OF_LOCOMOTION	-1.54979	0	0.0647653	-1.49701	0	0.143683
GSE40274_CTRL_VS_FOXP3_AND_GATA1_TRANSDUCED_ACTIVATED_CD4_TCELL_UP	-2.11467	0	0.000226274	-1.49675	0.00105152	0.143951
GO_MAINTENANCE_OF_GASTROINTESTINAL_EPITHELIUM	-1.56619	0.028866	0.059222	-1.49618	0.022069	0.14472
GO_POSITIVE_REGULATION_OF_OSTEOBLAST_PROLIFERATION	1.17664	0.257937	0.563597	-1.49592	0.0244233	0.144993
GSE3982_MAC_VS_TH2_UP	-1.74219	0	0.0191919	-1.49585	0	0.144965
YAMASHITA_LIVER_CANCER_STEM_CELL_DN	0.821072	0.841102	1	-1.49562	0.0148233	0.1452
REACTOME_INTEGRIN_CELL_SURFACE_INTERACTIONS	1.08731	0.286	0.689308	-1.4953	0.00673401	0.145615
MORF_LTK	-0.960511	0.552147	0.743282	-1.49517	0.0031679	0.145711
GSE30083_SP2_VS_SP4_THYMOCYTE_DN	-2.4264	0	0	-1.49495	0.00204918	0.145925
GO_REGULATION_OF_ERK1_AND_ERK2_CASCADE	-1.60845	0	0.0465419	-1.49471	0	0.146156
GO_CALCIUM_DEPENDENT_PHOSPHOLIPID_BINDING	0.999477	0.438662	0.83828	-1.49452	0.0179426	0.146354
LEI_HOXC8_TARGETS_UP	-1.04205	0.396226	0.570344	-1.49413	0.0407609	0.146878
FIGUEROA_AML_METHYLATION_CLUSTER_1_DN	-1.43246	0.0399202	0.116572	-1.49411	0.0191847	0.146753
GSE23502_WT_VS_HDC_KO_MYELOID_DERIVED_SUPPRESSOR_CELL_BM_DN	-1.78382	0	0.0137062	-1.49402	0	0.146772
GSE26495_PD1HIGH_VS_PD1LOW_CD8_TCELL_DN	-2.25987	0	1.26079e-05	-1.49349	0.00209424	0.147529
GO_REGULATION_OF_ENDOTHELIAL_CELL_PROLIFERATION	1.38396	0.0529412	0.333531	-1.49326	0.00967742	0.147802
GSE26488_CTRL_VS_PEPTIDE_INJECTION_HDAC7_DELTAP_TG_OT2_THYMOCYTE_UP	-1.6491	0	0.0362845	-1.49305	0.00207684	0.147996
REACTOME_COMPLEMENT_CASCADE	-1.35334	0.0950413	0.168531	-1.49304	0.0217687	0.14786
GO_FILAMIN_BINDING	0.853751	0.660118	1	-1.493	0.0310296	0.147781
GO_OLIGODENDROCYTE_DIFFERENTIATION	-1.12994	0.245098	0.41481	-1.49297	0.0200708	0.147675
GSE42021_CD24HI_VS_CD24LOW_TREG_THYMUS_DN	-1.86737	0	0.00651523	-1.49286	0.00208768	0.147729
GSE2128_CTRL_VS_MIMETOPE_NEGATIVE_SELECTION_DP_THYMOCYTE_C57BL6_UP	-1.28041	0.0457256	0.228577	-1.49177	0	0.149472
ZHAN_MULTIPLE_MYELOMA_LB_DN	-2.2807	0	6.60788e-06	-1.49154	0.0156062	0.14969
GCGCTTT_MIR518B_MIR518C_MIR518D	0.876484	0.650485	1	-1.4915	0.0344828	0.149621
GO_AMMONIUM_TRANSPORT	-0.75771	0.902287	1	-1.49148	0.0136986	0.149524
GSE22935_WT_VS_MYD88_KO_MACROPHAGE_UP	-2.2279	0	2.83845e-05	-1.49146	0	0.149407
GSE30962_ACUTE_VS_CHRONIC_LCMV_PRIMARY_INF_CD8_TCELL_UP	-2.26716	0	1.2798e-05	-1.49134	0	0.149476
MORF_IL9	0.941643	0.590196	0.947174	-1.49131	0.00782123	0.149389
GO_ANION_TRANSMEMBRANE_TRANSPORT	-1.22344	0.0552147	0.288431	-1.4913	0	0.149245
GO_POSITIVE_REGULATION_OF_PROTEIN_TYROSINE_KINASE_ACTIVITY	-1.21737	0.170683	0.295114	-1.49108	0.0208589	0.149457
MIKKELSEN_MCV6_ICP_WITH_H3K4ME3_AND_H3K27ME3	-1.5388	0.02407	0.0686967	-1.49104	0.0255164	0.149383
CHEOK_RESPONSE_TO_HD_MTX_UP	-2.19219	0	5.6037e-05	-1.49099	0.0333333	0.149319
GO_REGULATION_OF_IMMUNE_RESPONSE	-2.50366	0	0	-1.49046	0	0.150007
GSE21927_SPLEEN_C57BL6_VS_4T1_TUMOR_BALBC_MONOCYTES_DN	-2.16153	0	0.000107565	-1.49039	0	0.149971
GO_POSITIVE_REGULATION_OF_TRANSMEMBRANE_TRANSPORT	-1.41859	0.013308	0.124538	-1.49039	0.00105042	0.149832
GO_NEGATIVE_REGULATION_OF_LYASE_ACTIVITY	1.00053	0.438202	0.837396	-1.49031	0.0277078	0.14982
MAINA_VHL_TARGETS_DN	0.795859	0.757812	1	-1.49012	0.0226064	0.150018
REACTOME_CGMP_EFFECTS	1.14201	0.28023	0.607321	-1.49008	0.0311688	0.149932
GO_SECONDARY_ACTIVE_TRANSMEMBRANE_TRANSPORTER_ACTIVITY	-1.51145	0.00194175	0.0796325	-1.48966	0	0.150485
CSR_LATE_UP.V1_DN	-1.18417	0.152893	0.338377	-1.4896	0.00316456	0.150428
REACTOME_GLUCAGON_SIGNALING_IN_METABOLIC_REGULATION	0.91278	0.609709	0.989795	-1.4895	0.0182039	0.150445
ZWANG_EGF_INTERVAL_UP	-0.935821	0.571726	0.794329	-1.48939	0.012318	0.150475
GSE34515_CD16_POS_MONOCYTE_VS_DC_DN	-2.19116	0	5.58138e-05	-1.48931	0.00102354	0.15047
GSE34217_MIR17_92_OVEREXPRESS_VS_WT_ACT_CD8_TCELL_UP	-1.37258	0.0270833	0.154674	-1.48904	0.00423729	0.150739
ZHAN_V1_LATE_DIFFERENTIATION_GENES_UP	-1.20273	0.191489	0.313347	-1.48898	0.020757	0.150701
MAINA_VHL_TARGETS_UP	0.789798	0.73055	1	-1.4888	0.0286145	0.150846
KEGG_GLYCEROLIPID_METABOLISM	0.774122	0.848126	1	-1.48879	0.021102	0.150721
GO_RESPONSE_TO_ACETYLCHOLINE	-0.869971	0.639442	0.911719	-1.48841	0.022339	0.151259
GSE46606_IRF4HIGH_VS_IRF4MID_CD40L_IL2_IL5_DAY1_STIMULATED_BCELL_DN	-1.60627	0	0.0471104	-1.4883	0.00205973	0.151279
SANCHEZ_MDM2_TARGETS	1.23448	0.203125	0.482968	-1.48819	0.0333797	0.151312
GSE27786_CD8_TCELL_VS_NKCELL_DN	-1.14595	0.153209	0.391447	-1.48811	0.00102881	0.15128
GSE2706_UNSTIM_VS_8H_R848_DC_DN	-2.00845	0	0.00127854	-1.48803	0.0031185	0.15127
GSE2706_R848_VS_R848_AND_LPS_2H_STIM_DC_DN	-1.63629	0	0.0391554	-1.48794	0	0.151276
GSE22140_GERMFREE_VS_SPF_ARTHRITIC_MOUSE_CD4_TCELL_UP	-1.74386	0	0.0188919	-1.48784	0	0.151308
GSE21774_CD62L_POS_CD56_DIM_VS_CD62L_NEG_CD56_DIM_NK_CELL_DN	-2.01576	0	0.00112602	-1.48777	0.0010352	0.151274
SENESE_HDAC2_TARGETS_DN	1.23687	0.103922	0.48028	-1.48776	0.00325027	0.151142
MARTINELLI_IMMATURE_NEUTROPHIL_UP	-1.23343	0.217304	0.277437	-1.48756	0.0295858	0.151357
MODULE_58	-1.00562	0.422222	0.645489	-1.48744	0.0435967	0.151409
MIKKELSEN_NPC_HCP_WITH_H3K4ME3_AND_H3K27ME3	-1.55651	0	0.0622962	-1.48731	0.00206186	0.151461
GGGCGGR_SP1_Q6	1.07277	0.316206	0.712909	-1.48727	0.0138568	0.151381
GSE30083_SP1_VS_SP3_THYMOCYTE_DN	-1.98926	0	0.0016746	-1.48726	0.00207039	0.151252
PID_RHODOPSIN_PATHWAY	-0.645323	0.934183	1	-1.48712	0.0231362	0.151335
CHR2P25	0.917074	0.628942	0.985631	-1.48698	0.0189125	0.151394
GO_REGULATION_OF_REGULATED_SECRETORY_PATHWAY	0.941491	0.596457	0.947513	-1.48681	0.00213675	0.151533
REACTOME_NUCLEOTIDE_LIKE_PURINERGIC_RECEPTORS	-1.82042	0.00401606	0.0100617	-1.48657	0.0271003	0.151807
CAHOY_ASTROGLIAL	-1.31823	0.0577689	0.196882	-1.48654	0.00876232	0.151713
SMID_BREAST_CANCER_RELAPSE_IN_PLEURA_DN	-1.46026	0.0550661	0.102378	-1.48653	0.0353403	0.151587
GO_CARBOHYDRATE_DERIVATIVE_TRANSPORT	-0.996289	0.445783	0.66559	-1.4865	0.0170843	0.151513
REACTOME_KERATAN_SULFATE_BIOSYNTHESIS	1.12118	0.307229	0.638279	-1.48647	0.0243278	0.151418
GSE29164_UNTREATED_VS_CD8_TCELL_TREATED_MELANOMA_DAY3_DN	-2.00124	0	0.00142593	-1.48642	0	0.151364
GO_PEPTIDYL_GLUTAMIC_ACID_MODIFICATION	0.984543	0.473684	0.866496	-1.48633	0.0287141	0.151389
GO_CHRONIC_INFLAMMATORY_RESPONSE	1.0964	0.360595	0.679725	-1.48624	0.0456376	0.15138
GO_NEURON_MATURATION	0.97856	0.494024	0.876999	-1.48615	0.026616	0.151384
GSE7831_CPG_VS_INFLUENZA_STIM_PDC_1H_DN	-1.65589	0	0.0347679	-1.48605	0.00102564	0.151408
GO_NEGATIVE_REGULATION_OF_BIOMINERAL_TISSUE_DEVELOPMENT	1.14225	0.270992	0.607247	-1.48571	0.0327225	0.151852
BIOCARTA_CFTR_PATHWAY	-0.820932	0.714868	0.967726	-1.48546	0.0363129	0.152117
GO_POSITIVE_REGULATION_OF_REGULATED_SECRETORY_PATHWAY	-0.909105	0.623158	0.844465	-1.48543	0.0169492	0.15202
GSE3039_NKT_CELL_VS_ALPHAALPHA_CD8_TCELL_UP	-1.50534	0	0.0820464	-1.48538	0.00102459	0.151965
BYSTROEM_CORRELATED_WITH_IL5_UP	-1.04724	0.381057	0.561401	-1.48535	0.0146396	0.151884
GO_REGULATION_OF_PLATELET_DERIVED_GROWTH_FACTOR_RECEPTOR_SIGNALING_PATHWAY	-0.78057	0.75	0.99806	-1.48521	0.0310391	0.151979
FULCHER_INFLAMMATORY_RESPONSE_LECTIN_VS_LPS_DN	-2.64105	0	0	-1.48501	0	0.152176
GO_VOCALIZATION_BEHAVIOR	1.61139	0.0204082	0.143294	-1.48494	0.0379919	0.152174
GNF2_TM4SF2	1.01643	0.429907	0.813374	-1.48492	0.0356671	0.15205
GSE42724_NAIVE_VS_MEMORY_BCELL_UP	-1.69269	0	0.0272676	-1.48462	0.00205973	0.152396
GSE19888_CTRL_VS_TCELL_MEMBRANES_ACT_MAST_CELL_PRETREAT_A3R_INH_DN	-2.57639	0	0	-1.48451	0.00306748	0.152448
GO_MYOSIN_FILAMENT	0.8156	0.736634	1	-1.48439	0.0343008	0.152489
ROSS_ACUTE_MYELOID_LEUKEMIA_CBF	1.79045	0	0.0538598	-1.48422	0.0110132	0.152614
GO_REGULATION_OF_BLOOD_PRESSURE	-1.22529	0.0948617	0.286445	-1.48414	0	0.152608
GSE21063_WT_VS_NFATC1_KO_3H_ANTI_IGM_STIM_BCELL_UP	-1.45777	0.00588235	0.10362	-1.48373	0.0020555	0.153142
GSE7509_UNSTIM_VS_IFNA_STIM_IMMATURE_DC_DN	-2.55016	0	0	-1.48359	0.00308008	0.153235
WANG_NFKB_TARGETS	-0.81571	0.743852	0.971338	-1.48354	0.0253807	0.153181
GSE29618_BCELL_VS_MDC_DN	-2.16519	0	9.21036e-05	-1.48344	0.00207469	0.153227
KEGG_CELL_ADHESION_MOLECULES_CAMS	-1.76572	0	0.0159658	-1.48323	0.00877193	0.153447
KINNEY_DNMT1_METHYLATION_TARGETS	-1.11415	0.331942	0.440311	-1.48299	0.0331034	0.153724
GO_NEGATIVE_REGULATION_OF_CYCLIC_NUCLEOTIDE_METABOLIC_PROCESS	0.969758	0.490722	0.89045	-1.48284	0.0191159	0.153841
GO_REGULATION_OF_MACROPHAGE_ACTIVATION	-0.91093	0.563147	0.842056	-1.48281	0.0312891	0.153749
GSE37605_FOXP3_FUSION_GFP_VS_IRES_GFP_TREG_C57BL6_DN	-1.09076	0.236626	0.478546	-1.48277	0.00104275	0.153691
GO_CYCLIC_NUCLEOTIDE_BINDING	1.43273	0.0576923	0.291593	-1.48271	0.0220318	0.153655
LINDSTEDT_DENDRITIC_CELL_MATURATION_D	-2.34116	0	4.03209e-06	-1.48226	0.0145251	0.154304
GSE16385_UNTREATED_VS_12H_ROSIGLITAZONE_TREATED_MACROPHAGE_UP	0.90538	0.702247	0.998174	-1.48212	0.0021164	0.154417
GO_LEUKOCYTE_DEGRANULATION	-1.356	0.0951374	0.166843	-1.48199	0.0263819	0.154497
GO_NEGATIVE_REGULATION_OF_WOUND_HEALING	0.986103	0.478764	0.86316	-1.48187	0.0150463	0.15454
GO_REGULATION_OF_RESPIRATORY_GASEOUS_EXCHANGE_BY_NEUROLOGICAL_SYSTEM_PROCESS	-1.54357	0.0237154	0.0670564	-1.48181	0.0386207	0.154504
GSE40274_CTRL_VS_FOXP3_AND_XBP1_TRANSDUCED_ACTIVATED_CD4_TCELL_DN	-1.76407	0	0.0162451	-1.48154	0.00311203	0.15481
GSE45365_NK_CELL_VS_CD11B_DC_MCMV_INFECTION_DN	-2.06599	0	0.000526928	-1.48152	0	0.154701
MODULE_92	-1.58768	0	0.0525613	-1.48129	0.00844773	0.154974
GO_POSITIVE_REGULATION_OF_ACUTE_INFLAMMATORY_RESPONSE	-1.68755	0	0.0283187	-1.48126	0.0275689	0.154885
GSE22611_NOD2_TRANSD_VS_CTRL_TRANSD_HEK293_MDP_STIM_2H_DN	1.1615	0.162651	0.584338	-1.48113	0.00862999	0.154959
GSE2706_R848_VS_LPS_2H_STIM_DC_DN	-1.38611	0.0202429	0.145435	-1.48103	0	0.155005
GO_DEFENSE_RESPONSE_TO_VIRUS	-2.39857	0	0	-1.4809	0.00424178	0.155075
MODULE_341	-1.04098	0.366812	0.572538	-1.48086	0.0134078	0.155004
ZHENG_GLIOBLASTOMA_PLASTICITY_DN	0.884764	0.710059	1	-1.48058	0.0150115	0.155352
GSE360_DC_VS_MAC_B_MALAYI_HIGH_DOSE_DN	-1.89748	0	0.0048873	-1.4805	0.002079	0.155349
WU_APOPTOSIS_BY_CDKN1A_NOT_VIA_TP53	1.34453	0.112033	0.376357	-1.48046	0.0254597	0.155279
GO_ACTIVE_TRANSMEMBRANE_TRANSPORTER_ACTIVITY	-1.43606	0	0.114769	-1.4803	0	0.155412
GO_INORGANIC_ION_TRANSMEMBRANE_TRANSPORT	-1.28048	0.00581395	0.228527	-1.48027	0	0.155319
GO_REGULATION_OF_SYSTEM_PROCESS	1.26799	0.0116732	0.444117	-1.48015	0	0.155374
GAVIN_FOXP3_TARGETS_CLUSTER_P7	-1.76853	0	0.0156192	-1.47987	0.00986842	0.155728
NIELSEN_SCHWANNOMA_UP	-1.26645	0.177778	0.241671	-1.4798	0.0282638	0.15571
GO_ENSHEATHMENT_OF_NEURONS	-1.026	0.413088	0.602573	-1.47962	0.00870511	0.15589
GO_DICARBOXYLIC_ACID_TRANSMEMBRANE_TRANSPORTER_ACTIVITY	-0.952081	0.541841	0.76209	-1.47952	0.029703	0.155933
ABBUD_LIF_SIGNALING_1_UP	0.908666	0.606589	0.9953	-1.47938	0.0193004	0.156038
GO_NEURON_CELL_CELL_ADHESION	1.17637	0.248544	0.563915	-1.47922	0.0474255	0.156178
GO_REGULATION_OF_CATECHOLAMINE_SECRETION	1.26242	0.138277	0.448906	-1.47919	0.0145985	0.156091
GSE24142_EARLY_THYMIC_PROGENITOR_VS_DN2_THYMOCYTE_FETAL_UP	-1.94479	0	0.0028862	-1.47892	0.00102145	0.156393
GO_PRESYNAPTIC_PROCESS_INVOLVED_IN_SYNAPTIC_TRANSMISSION	1.16936	0.141748	0.572718	-1.47855	0.00432432	0.15691
GO_REGULATION_OF_TOLL_LIKE_RECEPTOR_4_SIGNALING_PATHWAY	0.700742	0.86653	1	-1.47839	0.0325945	0.15705
GSE24634_IL4_VS_CTRL_TREATED_NAIVE_CD4_TCELL_DAY10_DN	-2.06632	0	0.000522889	-1.47833	0.00204708	0.15703
GO_FATTY_ACID_DERIVATIVE_BIOSYNTHETIC_PROCESS	0.892904	0.664	1	-1.47832	0.0269321	0.156914
ZHENG_FOXP3_TARGETS_IN_T_LYMPHOCYTE_DN	-1.9182	0	0.0038656	-1.47823	0.01868	0.15693
GO_LONG_CHAIN_FATTY_ACID_TRANSPORT	0.720494	0.915289	1	-1.47807	0.0288462	0.157089
GO_POSITIVE_REGULATION_OF_WOUND_HEALING	1.14212	0.262956	0.607438	-1.47793	0.0268692	0.15719
GO_REGULATION_OF_INSULIN_SECRETION_INVOLVED_IN_CELLULAR_RESPONSE_TO_GLUCOSE_STIMULUS	0.926746	0.596558	0.972457	-1.47779	0.0209059	0.157291
LEE_LIVER_CANCER_MYC_TGFA_UP	-1.07161	0.334025	0.512597	-1.47778	0.0173812	0.157165
GO_LIPID_DIGESTION	-1.09399	0.322034	0.473105	-1.47763	0.039267	0.1573
PLASARI_TGFB1_SIGNALING_VIA_NFIC_10HR_UP	-1.69813	0.0104384	0.0263788	-1.4776	0.02	0.157214
REACTOME_PHOSPHOLIPASE_C_MEDIATED_CASCADE	1.11272	0.289963	0.649724	-1.47759	0.0153846	0.157094
BARRIER_CANCER_RELAPSE_NORMAL_SAMPLE_UP	-0.944005	0.558416	0.778489	-1.47745	0.0328698	0.157203
GO_SPERM_CAPACITATION	-0.723735	0.826667	1	-1.47723	0.0379085	0.157414
GSE29949_CD8_POS_DC_SPLEEN_VS_DC_BRAIN_DN	-1.38845	0.00378072	0.143858	-1.47721	0.00103627	0.15731
GSE35825_IFNA_VS_IFNG_STIM_MACROPHAGE_UP	-1.7999	0	0.0120051	-1.47721	0.00311526	0.157173
GSE9509_10MIN_VS_30MIN_LPS_STIM_IL10_KO_MACROPHAGE_DN	-1.07502	0.29065	0.50574	-1.47717	0.00205761	0.157089
GSE22886_NAIVE_CD4_TCELL_VS_NEUTROPHIL_DN	-1.87861	0	0.00588699	-1.47709	0.00207684	0.15708
NABA_MATRISOME_ASSOCIATED	-1.64992	0	0.0361723	-1.477	0	0.157099
GO_SOLUTE_SODIUM_SYMPORTER_ACTIVITY	-1.48238	0.0323887	0.0926296	-1.47665	0.0204327	0.157582
GSE15624_CTRL_VS_6H_HALOFUGINONE_TREATED_CD4_TCELL_UP	-1.3054	0.0383065	0.207028	-1.47656	0.00422387	0.157604
ZHAN_MULTIPLE_MYELOMA_PR_DN	-1.58996	0.0102881	0.0518647	-1.47624	0.0190476	0.158055
HSIAO_LIVER_SPECIFIC_GENES	-1.04194	0.340816	0.570522	-1.47595	0.00204708	0.158433
VALK_AML_CLUSTER_2	1.27795	0.132797	0.434581	-1.47574	0.0261194	0.158655
SCHURINGA_STAT5A_TARGETS_DN	-1.31264	0.144841	0.201363	-1.47553	0.0352782	0.158899
GSE36392_TYPE_2_MYELOID_VS_EOSINOPHIL_IL25_TREATED_LUNG_DN	-2.06219	0	0.000566342	-1.47544	0.00412371	0.158895
GO_MUSCLE_SYSTEM_PROCESS	-1.21805	0.0591716	0.294485	-1.47537	0	0.158887
GSE35825_UNTREATED_VS_IFNG_STIM_MACROPHAGE_UP	-1.37108	0.0120968	0.155833	-1.47522	0	0.158991
GSE24142_DN2_VS_DN3_THYMOCYTE_FETAL_DN	-1.69416	0	0.0270754	-1.47504	0.00205128	0.159176
GSE14415_INDUCED_TREG_VS_FOXP3_KO_INDUCED_TREG_IL2_CULTURE_DN	-1.54565	0	0.0663689	-1.47503	0.00321199	0.159056
ZHANG_ANTIVIRAL_RESPONSE_TO_RIBAVIRIN_UP	-1.0055	0.47505	0.645589	-1.47498	0.0332907	0.159013
GSE5455_HEALTHY_VS_TUMOR_BEARING_MOUSE_SPLEEN_MONOCYTE_UP	-1.63166	0	0.0404066	-1.47469	0.00103199	0.159388
GSE42021_TREG_PLN_VS_CD24LO_TREG_THYMUS_DN	-2.19671	0	5.72976e-05	-1.47439	0.00208551	0.159804
GCM_FCGR2B	-1.21419	0.178794	0.29912	-1.47413	0.0308261	0.160132
GO_POSITIVE_REGULATION_OF_MUSCLE_CONTRACTION	1.14381	0.266798	0.605253	-1.47403	0.0193939	0.160176
GO_NEUTRAL_LIPID_CATABOLIC_PROCESS	-0.856747	0.685225	0.929809	-1.47383	0.0272021	0.160376
GO_REGULATION_OF_ANTIGEN_PROCESSING_AND_PRESENTATION	-1.64664	0.0141988	0.0369407	-1.47379	0.0369863	0.160311
MORF_WNT1	1.08211	0.300199	0.696869	-1.47338	0.00663717	0.160855
GSE6566_STRONG_VS_WEAK_DC_STIMULATED_CD4_TCELL_UP	-1.23836	0.0899796	0.271988	-1.4732	0.0042328	0.161049
GSE3337_4H_VS_16H_IFNG_IN_CD8POS_DC_DN	-1.85363	0	0.00739839	-1.47313	0.00102775	0.161037
REACTOME_RAP1_SIGNALLING	-1.05249	0.386412	0.551546	-1.4729	0.034153	0.16124
TURASHVILI_BREAST_LOBULAR_CARCINOMA_VS_LOBULAR_NORMAL_UP	-1.30791	0.074364	0.205361	-1.4729	0.00554939	0.161124
GO_NEUTROPHIL_MEDIATED_IMMUNITY	-0.565057	0.973577	1	-1.47266	0.0283871	0.161404
KERLEY_RESPONSE_TO_CISPLATIN_UP	-1.07156	0.352227	0.512498	-1.47255	0.0336134	0.161449
MODULE_131	-0.744645	0.862903	1	-1.47243	0.0316056	0.161534
GO_AXONAL_GROWTH_CONE	-1.15729	0.256842	0.375673	-1.47221	0.0326797	0.161766
GO_NUCLEOSIDE_TRANSPORT	-0.853715	0.708	0.933605	-1.47206	0.0375522	0.161903
GSE2935_UV_INACTIVATED_VS_LIVE_SENDAI_VIRUS_INF_MACROPHAGE_DN	-2.48906	0	0	-1.47191	0.00103842	0.162009
GSE40274_CTRL_VS_IRF4_TRANSDUCED_ACTIVATED_CD4_TCELL_UP	-1.98351	0	0.00179894	-1.4719	0.00208333	0.161886
GSE27859_CD11C_INT_F480_HI_MACROPHAGE_VS_CD11C_ING_F480_INT_DC_DN	-1.44435	0.00826446	0.110387	-1.47185	0.00103199	0.161841
MORI_LARGE_PRE_BII_LYMPHOCYTE_DN	-2.36877	0	0	-1.47184	0.0198135	0.161706
GO_CELLULAR_RESPONSE_TO_BIOTIC_STIMULUS	-2.14062	0	0.000141467	-1.47179	0.00317797	0.161668
VALK_AML_WITH_11Q23_REARRANGED	-1.22784	0.220588	0.283652	-1.47175	0.0302234	0.161603
ZHANG_TLX_TARGETS_36HR_UP	-1.11522	0.199203	0.438541	-1.47171	0	0.161546
GO_NEGATIVE_REGULATION_OF_ADAPTIVE_IMMUNE_RESPONSE	-2.23436	0	2.03547e-05	-1.47166	0.0279126	0.161493
FINAK_BREAST_CANCER_SDPP_SIGNATURE	-1.33631	0.11245	0.182023	-1.47157	0.0337662	0.161521
GO_FIBROBLAST_GROWTH_FACTOR_RECEPTOR_BINDING	1.53849	0.027668	0.194217	-1.47155	0.0250991	0.161419
REACTOME_LATENT_INFECTION_OF_HOMO_SAPIENS_WITH_MYCOBACTERIUM_TUBERCULOSIS	-1.69918	0.00604839	0.0262229	-1.47151	0.0412621	0.161352
VALK_AML_CLUSTER_5	-2.91171	0	0	-1.47144	0.02375	0.161332
GSE3920_UNTREATED_VS_IFNA_TREATED_ENDOTHELIAL_CELL_UP	-1.5797	0.0020202	0.0550862	-1.47137	0.00308325	0.161293
GO_CHONDROCYTE_DEVELOPMENT	-0.79131	0.749495	0.991092	-1.47122	0.0440587	0.161398
YAMASHITA_LIVER_CANCER_STEM_CELL_UP	1.4208	0.0475285	0.301803	-1.47105	0.0269006	0.161598
GO_AXOLEMMA	-1.15934	0.272727	0.37282	-1.471	0.0428177	0.161535
MODULE_329	1.3815	0.057732	0.336633	-1.47091	0.0339181	0.16155
GO_CARBOHYDRATE_BINDING	-2.30276	0	7.24614e-06	-1.47083	0.00102987	0.161571
GO_SECRETION	-1.15285	0.0773931	0.382114	-1.47081	0	0.161462
GSE19198_1H_VS_24H_IL21_TREATED_TCELL_UP	-1.94583	0	0.00284638	-1.47077	0.003125	0.161406
KIM_GERMINAL_CENTER_T_HELPER_DN	1.19619	0.217304	0.535254	-1.47073	0.0327225	0.161349
GO_G_PROTEIN_COUPLED_RECEPTOR_ACTIVITY	-1.91457	0	0.00401258	-1.47069	0	0.161281
RUAN_RESPONSE_TO_TNF_TROGLITAZONE_DN	-1.19188	0.187629	0.327113	-1.47067	0.0248227	0.161169
GSE3982_EOSINOPHIL_VS_NKCELL_UP	-1.03439	0.366355	0.585975	-1.47047	0.00103627	0.161397
GO_T_HELPER_1_TYPE_IMMUNE_RESPONSE	-1.86297	0.00407332	0.00677708	-1.47046	0.0416667	0.16127
GSE3982_EOSINOPHIL_VS_TH2_UP	-1.34948	0.0182927	0.171611	-1.47041	0	0.161222
SHIRAISHI_PLZF_TARGETS_UP	-1.03821	0.404211	0.578548	-1.4701	0.0428177	0.161644
MIKKELSEN_ES_LCP_WITH_H3K27ME3	1.30251	0.15251	0.413385	-1.46994	0.0270636	0.161797
GO_ADRENERGIC_RECEPTOR_SIGNALING_PATHWAY	1.50512	0.042	0.222898	-1.46993	0.0310391	0.161682
GSE29949_MICROGLIA_BRAIN_VS_CD8_POS_DC_SPLEEN_DN	-1.14293	0.162651	0.395165	-1.46952	0.00208551	0.162272
HALMOS_CEBPA_TARGETS_DN	1.12086	0.255624	0.638371	-1.4694	0.0171779	0.162371
GO_REGULATION_OF_VIRAL_GENOME_REPLICATION	-1.86816	0	0.00647677	-1.46902	0.020362	0.162933
GSE18281_SUBCAPSULAR_VS_CENTRAL_CORTICAL_REGION_OF_THYMUS_DN	-2.24359	0	2.08314e-05	-1.46898	0.00102249	0.162856
GSE21546_WT_VS_SAP1A_KO_AND_ELK1_KO_DP_THYMOCYTES_DN	-1.09039	0.22379	0.479221	-1.46883	0.00101833	0.162991
GO_MICROGLIAL_CELL_ACTIVATION	-1.36267	0.117043	0.161822	-1.46875	0.0464481	0.162994
WANG_CLASSIC_ADIPOGENIC_TARGETS_OF_PPARG	-1.13927	0.277328	0.401314	-1.4687	0.0239295	0.162943
GO_INTERACTION_WITH_HOST	-1.72984	0	0.0211145	-1.46868	0.00526316	0.162831
REACTOME_PROSTANOID_LIGAND_RECEPTORS	-1.38463	0.128364	0.146167	-1.46825	0.030086	0.163454
GO_POSITIVE_REGULATION_OF_NATURAL_KILLER_CELL_MEDIATED_IMMUNITY	-2.33752	0	3.99429e-06	-1.46781	0.027668	0.16409
FEVR_CTNNB1_TARGETS_UP	-1.53321	0	0.0708591	-1.46775	0	0.164061
GSE37532_TREG_VS_TCONV_CD4_TCELL_FROM_VISCERAL_ADIPOSE_TISSUE_UP	-1.19911	0.152439	0.317859	-1.46773	0.0109649	0.163958
GSE22140_GERMFREE_VS_SPF_MOUSE_CD4_TCELL_DN	-1.66078	0	0.0338284	-1.46759	0.00204082	0.164082
GSE33162_HDAC3_KO_VS_HDAC3_KO_4H_LPS_STIM_MACROPHAGE_DN	-1.37586	0.0122951	0.152261	-1.46734	0	0.164423
GO_POSITIVE_REGULATION_OF_PRODUCTION_OF_MOLECULAR_MEDIATOR_OF_IMMUNE_RESPONSE	-1.7733	0.00642398	0.0150191	-1.4673	0.0112486	0.164358
GO_NEGATIVE_REGULATION_OF_PROTEIN_MATURATION	-1.24587	0.143713	0.263491	-1.46714	0.0301129	0.164507
BOYAULT_LIVER_CANCER_SUBCLASS_G5_DN	-1.78951	0	0.0131167	-1.46709	0.0406607	0.164447
LEE_LIVER_CANCER_DENA_DN	-0.850398	0.78937	0.938134	-1.46709	0.0172612	0.164325
FONTAINE_THYROID_TUMOR_UNCERTAIN_MALIGNANCY_UP	0.946713	0.532692	0.936711	-1.46684	0.0284653	0.164623
GO_POSITIVE_REGULATION_OF_INTERLEUKIN_10_PRODUCTION	-1.68907	0.00813008	0.0280371	-1.46674	0.0305344	0.164657
GO_SH3_SH2_ADAPTOR_ACTIVITY	-1.39694	0.0443975	0.137882	-1.4667	0.016129	0.164592
GSE7219_UNSTIM_VS_LPS_AND_ANTI_CD40_STIM_NIK_NFKB2_KO_DC_UP	-1.93343	0	0.00324435	-1.46647	0.00102669	0.164867
REACTOME_AQUAPORIN_MEDIATED_TRANSPORT	1.14973	0.23062	0.59975	-1.46644	0.0237812	0.164773
REACTOME_GPCR_DOWNSTREAM_SIGNALING	-1.79853	0	0.0121289	-1.46644	0	0.164639
GO_POSITIVE_REGULATION_OF_REACTIVE_OXYGEN_SPECIES_METABOLIC_PROCESS	-1.13321	0.210066	0.409839	-1.46639	0.0146893	0.164586
GO_NEUROTRANSMITTER_METABOLIC_PROCESS	-1.18837	0.223762	0.332302	-1.46625	0.042328	0.164692
GSE360_T_GONDII_VS_B_MALAYI_HIGH_DOSE_DC_UP	-1.30891	0.0323232	0.204579	-1.46624	0.00103734	0.164583
GO_RESPIRATORY_BURST	-1.83716	0.00412371	0.00869273	-1.4658	0.0435967	0.165267
GSE9006_HEALTHY_VS_TYPE_1_DIABETES_PBMC_AT_DX_UP	0.927651	0.637295	0.97125	-1.46579	0.00103093	0.165145
GO_POSITIVE_REGULATION_OF_INTERFERON_ALPHA_PRODUCTION	-1.6053	0.025	0.0474058	-1.46575	0.0348525	0.165066
ROETH_TERT_TARGETS_DN	-2.00157	0	0.00141975	-1.46569	0.0347323	0.16504
FOSTER_KDM1A_TARGETS_UP	-1.51482	0.00203252	0.0778564	-1.46564	0	0.164985
MODULE_174	-1.79491	0	0.0125205	-1.46559	0.00542299	0.164928
GO_POSITIVE_REGULATION_OF_MAPK_CASCADE	-1.4427	0	0.111341	-1.46557	0	0.16484
GOUYER_TUMOR_INVASIVENESS	1.32888	0.148218	0.392561	-1.46556	0.0277778	0.16473
FONTAINE_PAPILLARY_THYROID_CARCINOMA_UP	0.856027	0.72147	1	-1.465	0.0174622	0.165554
GSE17721_0.5H_VS_24H_CPG_BMDC_DN	-1.67343	0	0.0311999	-1.465	0	0.165441
CAR_HPX	-1.57408	0.00824742	0.056813	-1.46483	0.0211516	0.165613
GO_POSITIVE_REGULATION_OF_RESPONSE_TO_TUMOR_CELL	-1.7561	0.00638298	0.0172689	-1.46478	0.0257143	0.165556
GO_CELLULAR_RESPONSE_TO_VIRUS	-1.18	0.228866	0.343451	-1.46478	0.0333761	0.165423
GSE9650_NAIVE_VS_MEMORY_CD8_TCELL_DN	-2.25563	0	1.23932e-05	-1.46452	0.00103199	0.165784
GSE5589_LPS_VS_LPS_AND_IL10_STIM_MACROPHAGE_180MIN_UP	-1.94713	0	0.00280853	-1.46438	0	0.165912
GO_NEGATIVE_REGULATION_OF_HOMOTYPIC_CELL_CELL_ADHESION	-1.93873	0	0.00304021	-1.46418	0.00990099	0.166124
MODULE_361	-1.92075	0	0.00377798	-1.46416	0.00634921	0.166016
REACTOME_SLC_MEDIATED_TRANSMEMBRANE_TRANSPORT	-1.23485	0.0671785	0.275957	-1.46409	0.00102564	0.166003
GO_POSITIVE_REGULATION_OF_CELL_KILLING	-2.37011	0	0	-1.46376	0.0332512	0.166448
GO_POSITIVE_REGULATION_OF_IMMUNE_RESPONSE	-2.5074	0	0	-1.46368	0	0.166446
GSE2770_IL12_VS_TGFB_AND_IL12_TREATED_ACT_CD4_TCELL_48H_UP	-1.63667	0	0.0390833	-1.46364	0.00309917	0.16639
CHR16Q21	-0.55828	0.974249	1	-1.46345	0.0418301	0.16657
GO_GMP_METABOLIC_PROCESS	0.607759	0.945122	1	-1.46329	0.0453368	0.166715
GSE41867_DAY6_EFFECTOR_VS_DAY30_EXHAUSTED_CD8_TCELL_LCMV_CLONE13_UP	-2.29772	0	7.08511e-06	-1.46319	0.00103734	0.166756
GSE29949_MICROGLIA_VS_DC_BRAIN_DN	-1.30094	0.0364372	0.210713	-1.46306	0	0.166865
GO_PRIMARY_ALCOHOL_METABOLIC_PROCESS	-1.51973	0.0288066	0.0759709	-1.46302	0.0291262	0.16678
HALLMARK_ALLOGRAFT_REJECTION	-2.57552	0	0	-1.46289	0.00304878	0.16689
MODULE_298	-1.70152	0.0181818	0.0257937	-1.46241	0.0414878	0.167709
RUTELLA_RESPONSE_TO_HGF_VS_CSF2RB_AND_IL4_UP	-2.24699	0	2.11786e-05	-1.4624	0	0.167594
GO_NEGATIVE_REGULATION_OF_NEUROTRANSMITTER_TRANSPORT	0.6654	0.915851	1	-1.46237	0.0382514	0.1675
GSE6259_33D1_POS_DC_VS_CD8_TCELL_DN	-1.55557	0.00214592	0.0625966	-1.4621	0.00106724	0.167833
GO_ANKYRIN_BINDING	-1.80301	0.00208333	0.0116753	-1.46202	0.0358056	0.167838
GSE41867_DAY15_EFFECTOR_VS_DAY30_EXHAUSTED_CD8_TCELL_LCMV_CLONE13_UP	-2.25011	0	1.52361e-05	-1.46188	0.00102354	0.167953
BIOCARTA_NKT_PATHWAY	-2.46015	0	0	-1.46188	0.0357583	0.167821
GO_REGULATION_OF_TUMOR_NECROSIS_FACTOR_SUPERFAMILY_CYTOKINE_PRODUCTION	-2.0901	0	0.000332438	-1.46187	0.00762527	0.167708
REACTOME_INTERFERON_SIGNALING	-2.15629	0	0.000112714	-1.46182	0.00315789	0.167675
CASTELLANO_HRAS_AND_NRAS_TARGETS_DN	1.49291	0.0492424	0.234435	-1.46166	0.0246377	0.167825
GSE19888_ADENOSINE_A3R_INH_VS_TCELL_MEMBRANES_ACT_MAST_CELL_UP	-2.50476	0	0	-1.46159	0.00101937	0.167823
LI_WILMS_TUMOR_VS_FETAL_KIDNEY_1_UP	0.967788	0.564	0.894185	-1.46152	0.0010352	0.167789
GO_POSITIVE_REGULATION_OF_PROTEIN_AUTOPHOSPHORYLATION	0.782062	0.806706	1	-1.4615	0.0353866	0.167697
GSE11961_PLASMA_CELL_DAY7_VS_MEMORY_BCELL_DAY40_DN	1.09637	0.237113	0.679585	-1.46148	0.00206186	0.167601
GSE3982_CTRL_VS_LPS_48H_DC_DN	-2.04961	0	0.000697363	-1.46119	0.00103413	0.168002
GO_POSITIVE_REGULATION_OF_MUSCLE_HYPERTROPHY	-0.849334	0.7	0.939005	-1.46092	0.0334225	0.168382
GO_POSITIVE_REGULATION_OF_EXOCYTOSIS	-0.975512	0.472279	0.712833	-1.46091	0.0214205	0.168264
GO_MULTI_ORGANISM_BEHAVIOR	1.22664	0.145709	0.492221	-1.46077	0.010158	0.168393
GSE14415_INDUCED_TREG_VS_FOXP3_KO_INDUCED_TREG_IL2_CULTURE_UP	-2.19312	0	5.64889e-05	-1.46072	0.00310881	0.168328
GO_HYDROLASE_ACTIVITY_ACTING_ON_CARBON_NITROGEN_BUT_NOT_PEPTIDE_BONDS_IN_LINEAR_AMIDINES	-0.965899	0.523438	0.731767	-1.46053	0.0388489	0.168522
GNF2_GSTM1	-1.08926	0.262834	0.481118	-1.4605	0.00883002	0.168432
CHANG_POU5F1_TARGETS_DN	-1.19738	0.272532	0.320089	-1.46044	0.041847	0.16842
GO_NEGATIVE_REGULATION_OF_STRESS_FIBER_ASSEMBLY	0.965963	0.507605	0.897809	-1.46021	0.0470588	0.168717
GSE5589_WT_VS_IL6_KO_LPS_AND_IL6_STIM_MACROPHAGE_45MIN_UP	-1.44652	0.00202429	0.109336	-1.46019	0.00103093	0.168619
RICKMAN_TUMOR_DIFFERENTIATED_WELL_VS_MODERATELY_DN	-1.00162	0.435685	0.654043	-1.46009	0.010929	0.168666
APPIERTO_RESPONSE_TO_FENRETINIDE_UP	-0.913867	0.604289	0.836687	-1.46	0.0257611	0.168667
GO_REGULATION_OF_CELLULAR_EXTRAVASATION	-1.75964	0.00414938	0.016779	-1.45994	0.0498084	0.168634
GO_L_AMINO_ACID_IMPORT	-0.988875	0.460744	0.682312	-1.45987	0.045911	0.168646
GO_REGULATION_OF_CYTOKINE_BIOSYNTHETIC_PROCESS	-2.21125	0	3.80004e-05	-1.45981	0.00877193	0.168618
MODULE_2	-1.18398	0.0660194	0.338576	-1.45961	0	0.16885
ZHOU_INFLAMMATORY_RESPONSE_LPS_UP	-1.30508	0.010352	0.207357	-1.45945	0	0.169049
GO_SYNAPTIC_VESICLE_ENDOCYTOSIS	0.924533	0.554455	0.974397	-1.45938	0.0358566	0.169045
LEE_BMP2_TARGETS_UP	-1.19362	0.0281955	0.324412	-1.4591	0	0.169391
GO_REGULATION_OF_BLOOD_CIRCULATION	1.35018	0.00787402	0.370995	-1.45903	0.00101112	0.169391
GO_REGULATION_OF_ADAPTIVE_IMMUNE_RESPONSE	-2.29392	0	7.02656e-06	-1.45893	0.00850159	0.169449
GO_MICROVILLUS_MEMBRANE	1.54937	0.0283554	0.185556	-1.45879	0.0327654	0.16955
GO_POSITIVE_REGULATION_OF_COAGULATION	0.724619	0.87406	1	-1.45877	0.0297158	0.169457
GO_MICROVILLUS_ORGANIZATION	-1.3082	0.138889	0.205128	-1.45872	0.0380079	0.169403
FRIDMAN_SENESCENCE_UP	-1.44155	0.0274841	0.111692	-1.45851	0.0122494	0.169657
TAVOR_CEBPA_TARGETS_DN	1.03231	0.4	0.786612	-1.45832	0.035488	0.169874
GO_SEMAPHORIN_RECEPTOR_COMPLEX	-1.07755	0.348387	0.500789	-1.45795	0.0393812	0.170417
NABA_ECM_REGULATORS	-1.60701	0	0.0469329	-1.45789	0.00204918	0.170397
GO_WIDE_PORE_CHANNEL_ACTIVITY	1.09252	0.34375	0.68112	-1.45774	0.0435356	0.170546
BEGUM_TARGETS_OF_PAX3_FOXO1_FUSION_UP	-1.22144	0.126016	0.290885	-1.45752	0.0244755	0.17083
HONRADO_BREAST_CANCER_BRCA1_VS_BRCA2	-0.752324	0.803119	1	-1.45747	0.0482574	0.170791
GSE32034_LY6C_HIGH_VS_LOW_MONOCYTE_UP	-1.92141	0	0.00375681	-1.45745	0	0.170693
GSE37532_TREG_VS_TCONV_PPARG_KO_CD4_TCELL_FROM_VISCERAL_ADIPOSE_TISSUE_DN	-1.64771	0	0.0366522	-1.45741	0	0.170635
GSE13306_TREG_VS_TCONV_LAMINA_PROPRIA_UP	-1.30739	0.0383065	0.205728	-1.45738	0.00102459	0.170563
LTE2_UP.V1_DN	-1.38197	0.0116505	0.148163	-1.45734	0.00208333	0.17052
GO_POSITIVE_REGULATION_OF_RHO_PROTEIN_SIGNAL_TRANSDUCTION	-1.14609	0.279678	0.391252	-1.45726	0.0369357	0.170559
BERTUCCI_MEDULLARY_VS_DUCTAL_BREAST_CANCER_DN	1.04247	0.351816	0.77086	-1.45709	0.00310881	0.17073
GSE360_HIGH_DOSE_B_MALAYI_VS_M_TUBERCULOSIS_DC_DN	-1.97003	0	0.00212163	-1.45698	0.00103093	0.170808
WENG_POR_TARGETS_LIVER_UP	-0.792614	0.819149	0.989853	-1.4569	0.0191388	0.170821
MCBRYAN_PUBERTAL_TGFB1_TARGETS_DN	-1.12619	0.247241	0.421148	-1.45681	0.0148064	0.170861
GO_DIACYLGLYCEROL_BINDING	-1.09412	0.356998	0.472989	-1.45679	0.0628415	0.170765
GO_POSITIVE_REGULATION_OF_SMOOTH_MUSCLE_CELL_MIGRATION	-1.32831	0.104034	0.188641	-1.45624	0.0383189	0.171684
GO_MYOTUBE_DIFFERENTIATION	-0.83983	0.755411	0.947602	-1.45602	0.0200708	0.171962
REACTOME_GPCR_LIGAND_BINDING	-2.02515	0	0.0010024	-1.45593	0	0.171987
DEBOSSCHER_NFKB_TARGETS_REPRESSED_BY_GLUCOCORTICOIDS	0.966225	0.544747	0.89728	-1.45591	0.0328084	0.171891
GSE19198_6H_VS_24H_IL21_TREATED_TCELL_UP	-1.63751	0	0.0389065	-1.45581	0.00207039	0.171968
KAECH_DAY8_EFF_VS_DAY15_EFF_CD8_TCELL_DN	-1.67749	0	0.0303982	-1.45575	0.00102775	0.171915
PID_INTEGRIN1_PATHWAY	1.23016	0.138672	0.485601	-1.45573	0.0193182	0.171818
GSE8921_UNSTIM_0H_VS_TLR1_2_STIM_MONOCYTE_3H_DN	-0.922484	0.648305	0.820627	-1.45558	0	0.171948
GSE4590_LARGE_PRE_BCELL_VS_VPREB_POS_LARGE_PRE_BCELL_UP	-1.18708	0.133858	0.334164	-1.45556	0.00103413	0.171871
GO_REGULATION_OF_RESPONSE_TO_TUMOR_CELL	-1.89426	0	0.00503623	-1.45539	0.0314286	0.172033
MODULE_6	-1.24312	0.0332031	0.266647	-1.45535	0	0.171985
RODWELL_AGING_KIDNEY_NO_BLOOD_UP	-1.08219	0.266798	0.492815	-1.45534	0.00102459	0.171882
MODULE_164	0.820394	0.816956	1	-1.45524	0.023918	0.171907
SOUCEK_MYC_TARGETS	-1.0961	0.351579	0.469344	-1.45523	0.0385185	0.171784
GO_REGULATION_OF_TOLL_LIKE_RECEPTOR_SIGNALING_PATHWAY	-1.62671	0.00860215	0.0415947	-1.45518	0.027027	0.171749
GSE24634_IL4_VS_CTRL_TREATED_NAIVE_CD4_TCELL_DAY3_UP	-1.46042	0	0.102296	-1.455	0	0.171963
LEIN_CHOROID_PLEXUS_MARKERS	-1.20435	0.132898	0.311397	-1.45499	0.0132013	0.171845
MAHAJAN_RESPONSE_TO_IL1A_UP	-1.63903	0.0021322	0.0386207	-1.45495	0.0146232	0.171786
GO_POSITIVE_REGULATION_OF_INTERLEUKIN_8_PRODUCTION	-1.93839	0	0.00305056	-1.45473	0.0280702	0.172065
GSE40274_CTRL_VS_XBP1_TRANSDUCED_ACTIVATED_CD4_TCELL_UP	-2.50397	0	0	-1.45472	0.00104058	0.171941
REACTOME_DAG_AND_IP3_SIGNALING	-0.792095	0.805882	0.990278	-1.4547	0.0282209	0.171868
GO_INTRINSIC_COMPONENT_OF_PLASMA_MEMBRANE	-1.86586	0	0.00660387	-1.4546	0	0.171925
GO_INTESTINAL_ABSORPTION	-0.513959	0.994024	1	-1.45458	0.0330789	0.171841
CHANG_POU5F1_TARGETS_UP	-0.88536	0.613687	0.887763	-1.45447	0.0487484	0.171876
GO_APICOLATERAL_PLASMA_MEMBRANE	1.68677	0.00754717	0.0949329	-1.45442	0.0347222	0.171842
GO_TRANS_GOLGI_NETWORK_TRANSPORT_VESICLE	-1.4927	0.0449679	0.0876098	-1.45429	0.0432099	0.171949
MODY_HIPPOCAMPUS_NEONATAL	-0.831866	0.73374	0.956186	-1.45428	0.0335821	0.171839
MORF_FLT1	1.02242	0.407619	0.803676	-1.4542	0.0075594	0.171859
GO_CHEMOSENSORY_BEHAVIOR	1.45601	0.0516899	0.271026	-1.45395	0.0493827	0.172206
ZHANG_RESPONSE_TO_IKK_INHIBITOR_AND_TNF_UP	-1.55918	0	0.061391	-1.45391	0.00101937	0.172145
JECHLINGER_EPITHELIAL_TO_MESENCHYMAL_TRANSITION_UP	-1.18259	0.1875	0.340145	-1.45368	0.0167224	0.172428
GO_SERINE_HYDROLASE_ACTIVITY	-1.91105	0	0.00420176	-1.45365	0.0010352	0.172367
GO_NEGATIVE_REGULATION_OF_COAGULATION	-1.04835	0.363445	0.559365	-1.45356	0.0340219	0.172407
GNF2_S100A4	-2.77916	0	0	-1.45341	0.0198511	0.17255
MODULE_512	1.08954	0.327309	0.687232	-1.45339	0.0356704	0.172443
GO_3_5_CYCLIC_GMP_PHOSPHODIESTERASE_ACTIVITY	1.22296	0.211577	0.49706	-1.45316	0.0524899	0.172767
GSE26890_CXCR1_NEG_VS_POS_EFFECTOR_CD8_TCELL_UP	-2.45779	0	0	-1.45308	0	0.172777
MIKKELSEN_PARTIALLY_REPROGRAMMED_TO_PLURIPOTENCY	-1.79632	0.00406504	0.0123553	-1.45297	0.0486409	0.172879
GO_REGULATION_OF_TRANSMEMBRANE_TRANSPORT	-1.06805	0.242661	0.519888	-1.45288	0	0.172923
YAO_TEMPORAL_RESPONSE_TO_PROGESTERONE_CLUSTER_6	-1.12068	0.258064	0.430557	-1.45286	0.0171038	0.17283
GO_TRANSEPITHELIAL_TRANSPORT	-1.25633	0.178649	0.251553	-1.45269	0.0452617	0.173013
BIOCARTA_CYTOKINE_PATHWAY	-1.66192	0.0225873	0.0335973	-1.45218	0.0503979	0.173834
REACTOME_SMOOTH_MUSCLE_CONTRACTION	1.06861	0.357006	0.718362	-1.45195	0.0430925	0.174122
GSE24726_WT_VS_E2-2_KO_PDC_DAY6_POST_DELETION_DN	-1.48995	0.00770713	0.0888866	-1.45194	0	0.174016
GO_PHOTORECEPTOR_DISC_MEMBRANE	-1.0833	0.362683	0.490622	-1.45165	0.0462585	0.174435
GO_A_BAND	1.10566	0.296501	0.664233	-1.45149	0.0407125	0.174624
GSE33424_CD161_INT_VS_NEG_CD8_TCELL_UP	-2.45637	0	0	-1.45148	0.00205128	0.1745
GO_REGULATION_OF_ENDOCRINE_PROCESS	1.54365	0.008	0.190487	-1.45148	0.0253317	0.174385
CCACACA_MIR147	1.02179	0.420039	0.804508	-1.4514	0.0182857	0.174397
GO_REGULATION_OF_T_CELL_CHEMOTAXIS	-1.71677	0.0198676	0.0232183	-1.45134	0.0315186	0.174374
GSE40273_XBP1_KO_VS_WT_TREG_DN	-1.89416	0	0.00503631	-1.45124	0.00102145	0.174423
GSE5679_CTRL_VS_PPARG_LIGAND_ROSIGLITAZONE_AND_RARA_AGONIST_AM580_TREATED_DC_UP	-1.69771	0	0.0264385	-1.45122	0.0030896	0.174331
GSE27092_WT_VS_HDAC7_PHOSPHO_DEFICIENT_CD8_TCELL_UP	1.16078	0.150391	0.58567	-1.45096	0.00310238	0.174682
TUOMISTO_TUMOR_SUPPRESSION_BY_COL13A1_UP	-0.974545	0.528138	0.714406	-1.45093	0.0470914	0.174612
GSE24814_STAT5_KO_VS_WT_PRE_BCELL_UP	-1.34857	0.0208333	0.172427	-1.45083	0.00104058	0.174695
GO_NEGATIVE_REGULATION_OF_VIRAL_PROCESS	-1.97755	0	0.00193714	-1.4507	0.0142232	0.174805
RICKMAN_HEAD_AND_NECK_CANCER_A	1.68981	0	0.0944069	-1.45019	0.0199336	0.175626
CTIP_DN.V1_UP	-1.47703	0.0118343	0.0948427	-1.44985	0.00764192	0.176157
ONO_FOXP3_TARGETS_DN	-2.29997	0	7.1849e-06	-1.44977	0.0285036	0.176183
GSE42021_CD24HI_VS_CD24LOW_TCONV_THYMUS_DN	-2.17426	0	7.55301e-05	-1.44976	0.0041365	0.176079
GSE41867_NAIVE_VS_DAY6_LCMV_ARMSTRONG_EFFECTOR_CD8_TCELL_DN	-1.9127	0	0.00411245	-1.44975	0.00102041	0.175969
GSE28737_FOLLICULAR_VS_MARGINAL_ZONE_BCELL_BCL6_HET_DN	-1.48097	0.0060241	0.0930815	-1.44948	0.00307062	0.176324
GO_POSITIVE_REGULATION_OF_DIGESTIVE_SYSTEM_PROCESS	0.718129	0.810176	1	-1.44908	0.0279001	0.176943
GNF2_PTPRC	-2.4234	0	0	-1.44908	0.0231481	0.176822
GSE14415_INDUCED_TREG_VS_FAILED_INDUCED_TREG_DN	-1.94981	0	0.00272946	-1.44904	0.00104058	0.176757
HUI_MAPK14_TARGETS_UP	1.40087	0.077821	0.317389	-1.44901	0.0410783	0.176683
GO_CELLULAR_RESPONSE_TO_INTERLEUKIN_1	-1.63001	0.006	0.040832	-1.44899	0.0133929	0.176598
BUDHU_LIVER_CANCER_METASTASIS_DN	-1.08855	0.372141	0.482414	-1.44895	0.0342772	0.176539
GO_NUCLEOTIDE_KINASE_ACTIVITY	0.660518	0.948718	1	-1.44894	0.0411471	0.176412
HUMMERICH_MALIGNANT_SKIN_TUMOR_UP	-1.26712	0.195378	0.241102	-1.44878	0.046133	0.176614
GO_RESPONSE_TO_WATER	0.980546	0.497018	0.873619	-1.44874	0.0337662	0.176555
GO_PHOTOTRANSDUCTION	-1.49927	0.0392562	0.0846955	-1.44869	0.035545	0.176523
GO_PHOSPHATIDYLCHOLINE_BIOSYNTHETIC_PROCESS	-1.14509	0.268	0.392555	-1.44855	0.0380079	0.176653
GNF2_TST	-0.944925	0.574037	0.776455	-1.44844	0.0132597	0.176735
GSE40274_FOXP3_VS_FOXP3_AND_PBX1_TRANSDUCED_ACTIVATED_CD4_TCELL_UP	-1.92051	0	0.00377549	-1.44841	0.00205973	0.176651
P53_DN.V2_UP	-1.52937	0	0.0722164	-1.44823	0.00739176	0.176851
GO_REGULATION_OF_CAMP_METABOLIC_PROCESS	1.06812	0.311637	0.719504	-1.44813	0.00320513	0.176906
GO_POSITIVE_REGULATION_OF_INNATE_IMMUNE_RESPONSE	-2.39043	0	0	-1.44813	0	0.176784
GO_BASEMENT_MEMBRANE	1.08208	0.281513	0.696743	-1.44805	0.0119956	0.176804
CHR15Q15	0.909166	0.625239	0.994492	-1.44799	0.0215909	0.176793
GO_CELLULAR_CHEMICAL_HOMEOSTASIS	-1.46085	0	0.102222	-1.44781	0	0.177001
GO_HOMOTYPIC_CELL_CELL_ADHESION	0.970605	0.496109	0.889228	-1.44773	0.0247641	0.177016
GO_POSITIVE_REGULATION_OF_POTASSIUM_ION_TRANSMEMBRANE_TRANSPORT	-1.07732	0.336653	0.501366	-1.44772	0.0479798	0.176913
GSE14000_UNSTIM_VS_4H_LPS_DC_DN	-2.26573	0	1.2734e-05	-1.44767	0.00103093	0.176869
GSE41867_MEMORY_VS_EXHAUSTED_CD8_TCELL_DAY30_LCMV_UP	-1.97444	0	0.0019896	-1.44766	0.004111	0.176759
GO_SPECIFIC_GRANULE	-1.77463	0.0146444	0.0148526	-1.44752	0.0510753	0.176908
GO_M_BAND	1.23626	0.188119	0.479827	-1.4475	0.043758	0.176825
GSE39556_UNTREATED_VS_3H_POLYIC_INJ_MOUSE_NK_CELL_DN	0.931054	0.648393	0.96565	-1.44745	0.00207254	0.176769
GO_VOLTAGE_GATED_CALCIUM_CHANNEL_COMPLEX	1.36232	0.0777989	0.354659	-1.44741	0.0447205	0.17673
GO_RECEPTOR_ACTIVITY	-2.0794	0	0.000404636	-1.44738	0	0.176661
GSE24671_CTRL_VS_SENDAI_VIRUS_INFECTED_MOUSE_SPLENOCYTES_UP	-2.14591	0	0.000123308	-1.44723	0	0.176809
GO_FATTY_ACID_TRANSPORT	0.703792	0.929658	1	-1.44692	0.0207852	0.177256
GO_REGULATION_OF_ORGANIC_ACID_TRANSPORT	-0.879814	0.667327	0.8966	-1.44685	0.028777	0.17726
GO_LIPOPOLYSACCHARIDE_BINDING	-1.92923	0.00218818	0.00344176	-1.44656	0.0525606	0.177668
GO_BICELLULAR_TIGHT_JUNCTION_ASSEMBLY	1.23584	0.164729	0.48048	-1.44649	0.0374849	0.177674
REACTOME_ETHANOL_OXIDATION	-0.775165	0.734066	1	-1.44643	0.0410959	0.177657
GSE21670_STAT3_KO_VS_WT_CD4_TCELL_IL6_TREATED_DN	1.1291	0.178138	0.623908	-1.4463	0.00204708	0.177783
GO_RESPONSE_TO_TRANSFORMING_GROWTH_FACTOR_BETA	-1.04247	0.37069	0.569757	-1.44619	0.0052356	0.177864
GO_CELL_ADHESION_MOLECULE_BINDING	-1.57108	0	0.0577525	-1.44562	0.00207684	0.178801
CHYLA_CBFA2T3_TARGETS_DN	-1.41049	0	0.128938	-1.4455	0	0.178911
GSE25088_IL4_VS_IL4_AND_ROSIGLITAZONE_STIM_STAT6_KO_MACROPHAGE_DAY10_DN	-1.72866	0	0.0212552	-1.44548	0.00309278	0.178815
GO_REGULATION_OF_INTERLEUKIN_8_BIOSYNTHETIC_PROCESS	-1.86494	0.00207039	0.00664377	-1.44548	0.0468966	0.1787
MODULE_410	-2.02713	0	0.000981723	-1.44533	0.0402075	0.178872
GO_POSITIVE_REGULATION_OF_VASCULATURE_DEVELOPMENT	-1.22525	0.0853175	0.28646	-1.44504	0.00424628	0.179259
GO_POSITIVE_REGULATION_OF_CALCIUM_ION_IMPORT	-1.3676	0.0588235	0.158382	-1.44497	0.0195402	0.179251
REACTOME_G_ALPHA_I_SIGNALLING_EVENTS	-2.18083	0	7.45194e-05	-1.44477	0.00314465	0.179523
REACTOME_SYNTHESIS_OF_BILE_ACIDS_AND_BILE_SALTS_VIA_7ALPHA_HYDROXYCHOLESTEROL	1.1454	0.295539	0.603122	-1.44476	0.0533333	0.179417
BIOCARTA_BARRESTIN_SRC_PATHWAY	-0.828758	0.712245	0.959453	-1.44476	0.0539811	0.179296
AZARE_STAT3_TARGETS	1.06947	0.356061	0.717785	-1.44457	0.0452196	0.179494
GO_REGULATION_OF_PEPTIDE_SECRETION	1.13501	0.181818	0.615457	-1.44451	0	0.17949
GSE41176_UNSTIM_VS_ANTI_IGM_STIM_BCELL_24H_UP	-1.38581	0.008	0.145607	-1.44435	0.00623701	0.179653
GSE30971_CTRL_VS_LPS_STIM_MACROPHAGE_WBP7_KO_4H_DN	-2.08475	0	0.000359593	-1.44432	0.00520291	0.179601
GO_METAL_ION_TRANSMEMBRANE_TRANSPORTER_ACTIVITY	-1.28273	0.00630252	0.226695	-1.44429	0	0.179521
GNF2_HPN	-1.04707	0.331349	0.56171	-1.44411	0.0170032	0.17973
PID_IL4_2PATHWAY	-1.75061	0	0.0179662	-1.44388	0.0279395	0.180069
GO_REGULATION_OF_MESENCHYMAL_CELL_APOPTOTIC_PROCESS	1.72874	0.00798403	0.0724921	-1.44386	0.0380673	0.17997
REACTOME_STRIATED_MUSCLE_CONTRACTION	1.11939	0.301775	0.639078	-1.44383	0.0416125	0.179912
GO_REGENERATION	-1.11023	0.196319	0.445666	-1.44373	0.00312826	0.17996
GSE34515_CD16_NEG_MONOCYTE_VS_DC_UP	-2.46878	0	0	-1.44316	0	0.180882
GSE21380_NON_TFH_VS_TFH_CD4_TCELL_UP	-1.70229	0	0.0256798	-1.44313	0.00102669	0.180814
GSE21360_PRIMARY_VS_TERTIARY_MEMORY_CD8_TCELL_DN	-1.81783	0	0.0103063	-1.44295	0.00206825	0.181012
LEE_NEURAL_CREST_STEM_CELL_DN	1.30643	0.0529532	0.410411	-1.44293	0.0152838	0.180917
GO_REGULATION_OF_AMINE_TRANSPORT	1.29759	0.0909091	0.417968	-1.44289	0.0232558	0.18087
GSE7460_CD8_TCELL_VS_CD4_TCELL_ACT_UP	-2.08987	0	0.000333397	-1.44273	0.00410678	0.181065
GO_ANION_TRANSPORT	-1.1501	0.1	0.386222	-1.44268	0	0.181016
RASHI_RESPONSE_TO_IONIZING_RADIATION_2	-0.938471	0.607646	0.789186	-1.44266	0.00528541	0.18093
GO_REGULATION_OF_PROTEIN_ACTIVATION_CASCADE	-1.66081	0.00877193	0.0338395	-1.44243	0.0489335	0.181238
MORI_IMMATURE_B_LYMPHOCYTE_UP	-2.33108	0	3.89687e-06	-1.44221	0.0292398	0.181537
DAVICIONI_RHABDOMYOSARCOMA_PAX_FOXO1_FUSION_UP	1.37895	0.0383142	0.339568	-1.44209	0.0221187	0.181629
NIELSEN_SYNOVIAL_SARCOMA_UP	1.71095	0.0135135	0.0816011	-1.44197	0.0376135	0.181705
GO_POSITIVE_REGULATION_OF_SMOOTH_MUSCLE_CELL_PROLIFERATION	-1.15827	0.202479	0.37429	-1.44196	0.0205011	0.181609
GSE20727_ROS_INH_VS_ROS_INH_AND_DNFB_ALLERGEN_TREATED_DC_DN	-0.988902	0.493256	0.682488	-1.44194	0.0138004	0.18151
KIM_GLIS2_TARGETS_DN	-1.07029	0.36853	0.514942	-1.44175	0.0424597	0.181753
GO_MONOVALENT_CATION_PROTON_ANTIPORTER_ACTIVITY	0.887181	0.621118	1	-1.44173	0.0496552	0.18165
GO_REGULATION_OF_PRODUCTION_OF_MOLECULAR_MEDIATOR_OF_IMMUNE_RESPONSE	-1.71923	0	0.0228443	-1.44172	0.00966702	0.181548
GSE11961_GERMINAL_CENTER_BCELL_DAY7_VS_MEMORY_BCELL_DAY40_DN	-1.76131	0	0.0165408	-1.44158	0.00102987	0.181685
MIKKELSEN_MCV6_LCP_WITH_H3K4ME3	-1.90054	0	0.00472507	-1.44149	0.0042328	0.181734
GO_REGULATION_OF_PROTEIN_SECRETION	-1.73213	0	0.0207366	-1.44143	0	0.18172
MODULE_387	1.4142	0.0510806	0.306122	-1.44139	0.0314685	0.181675
PHESSE_TARGETS_OF_APC_AND_MBD2_UP	-0.994774	0.460922	0.669569	-1.44136	0.0465116	0.181607
GO_ANTIGEN_PROCESSING_AND_PRESENTATION_OF_ENDOGENOUS_ANTIGEN	-1.52859	0.0324544	0.0725175	-1.44129	0.0504202	0.181626
GO_RESPONSE_TO_ANGIOTENSIN	0.774533	0.760377	1	-1.44108	0.045392	0.181865
GO_KERATAN_SULFATE_METABOLIC_PROCESS	0.852953	0.694497	1	-1.44107	0.046595	0.181762
GO_RESPONSE_TO_ORGANOPHOSPHORUS	1.29763	0.0444015	0.418178	-1.44102	0.00630252	0.181728
GO_REGULATION_OF_METAL_ION_TRANSPORT	-1.32754	0.00959693	0.189384	-1.44089	0	0.181862
GSE360_CTRL_VS_M_TUBERCULOSIS_DC_DN	-1.59718	0.00591716	0.0497921	-1.44085	0.00310559	0.181819
MODULE_562	1.12017	0.309129	0.638317	-1.44084	0.0287582	0.181718
GSE22432_CDC_VS_COMMON_DC_PROGENITOR_UP	-1.31393	0.024	0.200431	-1.44077	0	0.181711
E2F1_UP.V1_DN	-1.37786	0.0182186	0.150828	-1.44074	0.00102459	0.181635
REACTOME_SIGNAL_REGULATORY_PROTEIN_SIRP_FAMILY_INTERACTIONS	-1.85044	0.00423729	0.00767059	-1.44072	0.0554785	0.181564
GO_REGULATION_OF_TRANSCRIPTION_FACTOR_IMPORT_INTO_NUCLEUS	-1.59524	0.00198413	0.0504126	-1.44035	0.0151351	0.182111
GSE7568_CTRL_VS_24H_TGFB_TREATED_MACROPHAGES_WITH_IL4_AND_DEXAMETHASONE_DN	-1.14677	0.164882	0.390247	-1.44026	0.00307692	0.182162
KHETCHOUMIAN_TRIM24_TARGETS_UP	-1.26977	0.118503	0.238998	-1.44009	0.022619	0.182334
GSE9509_LPS_VS_LPS_AND_IL10_STIM_IL10_KO_MACROPHAGE_10MIN_UP	-1.70596	0	0.0250429	-1.43993	0.00816326	0.182503
MODULE_287	0.794385	0.806911	1	-1.43982	0.0335731	0.182567
MCBRYAN_PUBERTAL_BREAST_3_4WK_UP	1.20438	0.0981964	0.523614	-1.43975	0.00205973	0.182584
IL2_UP.V1_DN	-1.37356	0.019685	0.153928	-1.43964	0.00311526	0.182654
REACTOME_SYNTHESIS_OF_BILE_ACIDS_AND_BILE_SALTS_VIA_24_HYDROXYCHOLESTEROL	1.37782	0.103647	0.340394	-1.43958	0.0322581	0.182661
GSE8835_HEALTHY_VS_CLL_CD8_TCELL_DN	-1.45814	0.00621118	0.103414	-1.43952	0.00518135	0.18265
GSE21063_WT_VS_NFATC1_KO_3H_ANTI_IGM_STIM_BCELL_DN	-2.23302	0	2.30299e-05	-1.43945	0.00205128	0.182667
GO_REGULATION_OF_NOREPINEPHRINE_SECRETION	1.55069	0.0319549	0.185497	-1.43924	0.0597015	0.182936
MODULE_68	-1.66393	0.0192308	0.0332006	-1.43922	0.0421348	0.182838
TORCHIA_TARGETS_OF_EWSR1_FLI1_FUSION_TOP20_UP	-0.838124	0.66996	0.949313	-1.43917	0.0518135	0.182814
DOANE_BREAST_CANCER_ESR1_DN	1.32963	0.0918164	0.392353	-1.43909	0.0428397	0.18283
GSE22432_PDC_VS_TGFB1_TREATEDCOMMON_DC_PROGENITOR_DN	-1.41137	0.00199203	0.128553	-1.43907	0.00306748	0.182758
REACTOME_SIGNALING_BY_GPCR	-1.78689	0	0.013371	-1.43893	0	0.182869
GO_POSITIVE_REGULATION_OF_IMMUNE_SYSTEM_PROCESS	-2.271	0	9.66115e-06	-1.43891	0	0.182767
KAYO_CALORIE_RESTRICTION_MUSCLE_UP	-1.3189	0.0439331	0.196666	-1.43887	0.0087241	0.18273
PATTERSON_DOCETAXEL_RESISTANCE	0.813248	0.746269	1	-1.43885	0.0421313	0.182661
ZEMBUTSU_SENSITIVITY_TO_CISPLATIN	-1.60884	0.0264766	0.0464922	-1.43874	0.0334672	0.182722
CHUNG_BLISTER_CYTOTOXICITY_DN	-1.15816	0.22541	0.374344	-1.43861	0.0321046	0.182849
GNF2_SPTA1	-2.19697	0	5.7415e-05	-1.43853	0.0191226	0.182867
GSE43863_NAIVE_VS_MEMORY_TFH_CD4_TCELL_D150_LCMV_UP	-2.06885	0	0.000503849	-1.43846	0.00511247	0.182889
GO_PHAGOCYTIC_VESICLE	-1.67626	0.00207469	0.0305775	-1.43818	0.0186813	0.183273
GNF2_TNFRSF1B	-2.87825	0	0	-1.43802	0.0285388	0.183477
GO_APICAL_PLASMA_MEMBRANE	1.1032	0.206413	0.66676	-1.43801	0	0.183359
GO_REGULATION_OF_CELL_ACTIVATION	-2.22376	0	3.34912e-05	-1.43793	0.00100402	0.183399
GO_NEGATIVE_REGULATION_OF_RESPONSE_TO_CYTOKINE_STIMULUS	-1.15325	0.230461	0.381634	-1.43772	0.040146	0.183675
TENEDINI_MEGAKARYOCYTE_MARKERS	1.77994	0	0.0564872	-1.43772	0.010158	0.183555
GO_NEUTROPHIL_ACTIVATION_INVOLVED_IN_IMMUNE_RESPONSE	-1.46998	0.0817996	0.0980321	-1.43768	0.0513552	0.183499
GSE7218_UNSTIM_VS_ANTIGEN_STIM_THROUGH_IGG_BCELL_DN	-2.86219	0	0	-1.43768	0.00419287	0.183387
TSENG_IRS1_TARGETS_UP	-0.881917	0.722338	0.893581	-1.43755	0.0138298	0.183502
GSE37336_LY6C_POS_VS_NEG_NAIVE_CD4_TCELL_DN	-1.30513	0.035343	0.207352	-1.4371	0.00634921	0.184248
RADAEVA_RESPONSE_TO_IFNA1_UP	-2.24027	0	2.06861e-05	-1.4369	0.0334129	0.184494
GSE22140_GERMFREE_VS_SPF_ARTHRITIC_MOUSE_CD4_TCELL_DN	-2.46818	0	0	-1.43681	0.00102987	0.184529
GSE43863_DAY6_EFF_VS_DAY150_MEM_LY6C_INT_CXCR5POS_CD4_TCELL_DN	-2.20668	0	4.55761e-05	-1.43681	0.00205128	0.184414
BROWNE_HCMV_INFECTION_20HR_DN	-1.15472	0.1875	0.379511	-1.43678	0.017316	0.184334
GSE34006_A2AR_KO_VS_A2AR_AGONIST_TREATED_TREG_UP	-2.03192	0	0.000907733	-1.43678	0.00102775	0.184217
REACTOME_OTHER_SEMAPHORIN_INTERACTIONS	-1.37371	0.100205	0.153908	-1.43671	0.0473538	0.184238
VALK_AML_WITH_FLT3_ITD	1.59757	0.00801603	0.150385	-1.4363	0.035409	0.184857
XU_AKT1_TARGETS_6HR	-1.83741	0.0020284	0.00867139	-1.43612	0.046332	0.185069
BIOCARTA_TCYTOTOXIC_PATHWAY	-2.2529	0	1.22149e-05	-1.43609	0.047043	0.185003
GO_REGULATION_OF_MUSCLE_SYSTEM_PROCESS	1.18426	0.114519	0.555017	-1.43604	0.00205973	0.184982
LEE_AGING_CEREBELLUM_UP	-1.74394	0	0.0188885	-1.43593	0.0230769	0.185061
GO_CELLULAR_ANION_HOMEOSTASIS	-0.986543	0.505155	0.687568	-1.43575	0.0605653	0.185269
MEISSNER_NPC_ICP_WITH_H3_UNMETHYLATED	-0.788015	0.75502	0.993149	-1.43572	0.0492021	0.185192
GO_REGULATION_OF_CYCLIC_NUCLEOTIDE_METABOLIC_PROCESS	1.168	0.163022	0.575161	-1.4354	0.0052521	0.185681
GO_NITROGEN_CYCLE_METABOLIC_PROCESS	1.02951	0.410749	0.790592	-1.4353	0.0529172	0.185752
MODULE_47	1.406	0.00623701	0.311158	-1.43503	0	0.186137
GSE3982_EOSINOPHIL_VS_BCELL_UP	-1.1937	0.0974155	0.324387	-1.43503	0	0.186017
GO_DISRUPTION_OF_CELLS_OF_OTHER_ORGANISM	-1.76219	0	0.0164589	-1.43503	0.0484522	0.185897
ONDER_CDH1_TARGETS_2_DN	-1.52077	0	0.075629	-1.43494	0	0.185939
GSE39916_B_CELL_SPLEEN_VS_PLASMA_CELL_BONE_MARROW_DN	-1.97622	0	0.00194655	-1.4349	0.00102669	0.185911
GO_PROTEIN_AUTOPROCESSING	-1.11558	0.316633	0.438416	-1.43481	0.0514286	0.185945
BROCKE_APOPTOSIS_REVERSED_BY_IL6	-1.49718	0.00204499	0.0855898	-1.43475	0	0.185966
GO_POSITIVE_REGULATION_OF_ADENYLATE_CYCLASE_ACTIVITY	1.05272	0.34902	0.752064	-1.4346	0.0321046	0.186107
GSE26030_UNSTIM_VS_RESTIM_TH1_DAY5_POST_POLARIZATION_UP	-1.42299	0.00796813	0.121975	-1.43441	0.00208117	0.186366
GSE19198_CTRL_VS_IL21_TREATED_TCELL_6H_DN	-1.74155	0	0.0193095	-1.43437	0.0010395	0.186319
GSE40274_CTRL_VS_SATB1_TRANSDUCED_ACTIVATED_CD4_TCELL_UP	-1.84227	0	0.00833296	-1.43433	0.00412797	0.186279
GSE22886_CD8_TCELL_VS_BCELL_NAIVE_DN	-1.553	0.0019685	0.0636674	-1.43418	0.00730689	0.186433
GSE15330_LYMPHOID_MULTIPOTENT_VS_MEGAKARYOCYTE_ERYTHROID_PROGENITOR_IKAROS_KO_DN	-2.27359	0	9.75999e-06	-1.4341	0.00102775	0.186445
GO_CYTOPLASMIC_VESICLE_PART	-1.19678	0.0371094	0.320561	-1.43404	0	0.186425
KEGG_ECM_RECEPTOR_INTERACTION	1.36281	0.0433925	0.35521	-1.43401	0.0122631	0.18635
MODULE_214	1.1522	0.259117	0.597123	-1.43383	0.0474308	0.186597
GO_REGULATION_OF_TRANSPORTER_ACTIVITY	-0.885255	0.77732	0.887943	-1.43379	0.00409417	0.186537
GO_RESPONSE_TO_LIPOPROTEIN_PARTICLE	-1.56591	0.0270833	0.0592912	-1.43378	0.0527704	0.186435
REACTOME_CA_DEPENDENT_EVENTS	0.853971	0.717092	1	-1.43338	0.0416141	0.187079
GSE40274_CTRL_VS_LEF1_TRANSDUCED_ACTIVATED_CD4_TCELL_UP	-1.69081	0	0.0276187	-1.43332	0.00209205	0.187057
GO_SUBPALLIUM_DEVELOPMENT	1.24577	0.183673	0.46861	-1.43302	0.0628205	0.187525
BUSA_SAM68_TARGETS_DN	1.20431	0.242063	0.523272	-1.43271	0.0425867	0.187976
GO_POSITIVE_REGULATION_OF_MAST_CELL_ACTIVATION	0.880069	0.637427	1	-1.43255	0.0438957	0.188151
HOSHIDA_LIVER_CANCER_SUBCLASS_S3	-1.08577	0.2423	0.486483	-1.43248	0.00307062	0.188172
GO_SYNAPTIC_VESICLE_LOCALIZATION	1.05908	0.349693	0.739622	-1.43244	0.0131004	0.188144
GSE6269_FLU_VS_E_COLI_INF_PBMC_UP	-2.28793	0	6.87504e-06	-1.4324	0.00733753	0.188091
NIELSEN_GIST	-0.92176	0.649087	0.821515	-1.43235	0.0176018	0.188078
GO_NEUTRAL_LIPID_BIOSYNTHETIC_PROCESS	-1.59895	0.00860215	0.0492464	-1.43229	0.0461923	0.188078
GSE20366_CD103_KLRG1_DP_VS_DN_TREG_DN	-1.47209	0	0.0970135	-1.43197	0.00206612	0.188545
GO_SYMPORTER_ACTIVITY	-1.7042	0	0.0253674	-1.43188	0.00741525	0.188599
GO_NEGATIVE_REGULATION_OF_PROTEIN_ACTIVATION_CASCADE	-1.59438	0.0340681	0.0505876	-1.43177	0.0551416	0.188687
STK33_NOMO_UP	-1.8415	0	0.00838072	-1.43176	0.00101523	0.188575
GNF2_CYP2B6	-1.11655	0.28719	0.437039	-1.43163	0.0366748	0.188702
SILIGAN_TARGETS_OF_EWS_FLI1_FUSION_DN	0.491748	0.992126	1	-1.43162	0.0572172	0.188594
MEISSNER_NPC_HCP_WITH_H3_UNMETHYLATED	-1.24526	0.0212766	0.264137	-1.43155	0	0.188578
MYLLYKANGAS_AMPLIFICATION_HOT_SPOT_27	-0.821569	0.71519	0.967297	-1.4315	0.0573427	0.188553
GSE11057_NAIVE_CD4_VS_PBMC_CD4_TCELL_DN	-2.08255	0	0.000380676	-1.43147	0.00103093	0.188497
GO_PERIPHERAL_NERVOUS_SYSTEM_AXON_ENSHEATHMENT	0.839225	0.699809	1	-1.43137	0.0415617	0.188574
GO_STRUCTURAL_CONSTITUENT_OF_CYTOSKELETON	-1.03818	0.400802	0.578479	-1.43134	0.0120482	0.18851
GO_INACTIVATION_OF_MAPK_ACTIVITY	-0.873892	0.649485	0.905389	-1.43133	0.0588972	0.188408
GO_POSITIVE_REGULATION_OF_INSULIN_LIKE_GROWTH_FACTOR_RECEPTOR_SIGNALING_PATHWAY	-1.18454	0.273109	0.337936	-1.43132	0.0507246	0.188292
GSE5679_PPARG_LIGAND_ROSIGLITAZONE_VS_RARA_AGONIST_AM580_TREATED_DC_DN	-2.00888	0	0.00126082	-1.4313	0	0.188211
GSE30083_SP1_VS_SP2_THYMOCYTE_DN	-1.69794	0	0.0263941	-1.4309	0.00522466	0.188893
GOZGIT_ESR1_TARGETS_DN	-1.33376	0.00206612	0.184242	-1.43086	0	0.188867
GO_CAMP_MEDIATED_SIGNALING	1.24171	0.175439	0.472993	-1.43045	0.046285	0.189557
GSE21670_TGFB_VS_IL6_TREATED_STAT3_KO_CD4_TCELL_DN	-2.05692	0	0.000612841	-1.43038	0.00414508	0.18956
EHRLICH_ICF_SYNDROM_UP	1.01809	0.43797	0.811047	-1.43035	0.056899	0.1895
GO_REGULATION_OF_FEEDING_BEHAVIOR	1.23628	0.182692	0.480299	-1.43013	0.056	0.189785
REACTOME_CELL_JUNCTION_ORGANIZATION	1.01355	0.432432	0.819019	-1.43011	0.037694	0.189687
GSE6259_FLT3L_INDUCED_33D1_POS_DC_VS_CD8_TCELL_UP	-1.13203	0.187123	0.411742	-1.4301	0.0116279	0.189604
REACTOME_CELL_EXTRACELLULAR_MATRIX_INTERACTIONS	1.0208	0.443431	0.805625	-1.42998	0.0768176	0.189716
GO_MECHANOSENSORY_BEHAVIOR	1.57098	0.0368932	0.169001	-1.42986	0.0510345	0.189832
GO_HETEROTYPIC_CELL_CELL_ADHESION	-2.01215	0	0.00119378	-1.42968	0.0538847	0.190056
GO_ASPARTATE_METABOLIC_PROCESS	-1.07036	0.356994	0.514886	-1.42946	0.0609929	0.190361
GO_POSITIVE_REGULATION_OF_CATION_CHANNEL_ACTIVITY	-0.779066	0.822086	0.99881	-1.42937	0.0455636	0.190404
GO_REGULATION_OF_IMMUNE_EFFECTOR_PROCESS	-2.04334	0	0.000754257	-1.4291	0	0.190814
GSE43955_TH0_VS_TGFB_IL6_TH17_ACT_CD4_TCELL_1H_UP	-1.3091	0.0285171	0.204413	-1.42908	0.00309278	0.190742
GO_REGULATION_OF_ALPHA_AMINO_3_HYDROXY_5_METHYL_4_ISOXAZOLE_PROPIONATE_SELECTIVE_GLUTAMATE_RECEPTOR_ACTIVITY	1.24936	0.19084	0.464847	-1.42905	0.0489418	0.190664
GO_REGULATION_OF_INTERLEUKIN_17_PRODUCTION	-2.01075	0	0.0012202	-1.42863	0.0489335	0.191396
BOYAULT_LIVER_CANCER_SUBCLASS_G3_DN	-1.48231	0.0269231	0.0926117	-1.42859	0.037037	0.191345
RAF_UP.V1_UP	-1.41237	0.010846	0.127967	-1.42859	0.00414938	0.191223
GSE13946_CTRL_VS_DSS_COLITIS_GD_TCELL_FROM_COLON_UP	-2.07763	0	0.000420204	-1.42826	0.00308642	0.191749
NOTCH_DN.V1_DN	-1.77786	0	0.0144601	-1.42818	0.00414079	0.191773
GO_GATED_CHANNEL_ACTIVITY	1.01484	0.418426	0.816971	-1.42811	0.0020141	0.191768
GSE21927_SPLEEN_VS_TUMOR_MONOCYTE_C57BL6_UP	0.960562	0.559615	0.909682	-1.42779	0.00739176	0.192263
PETROVA_PROX1_TARGETS_DN	-1.3124	0.0829876	0.20157	-1.42773	0.0264064	0.192248
GO_REGULATION_OF_GRANULOCYTE_MACROPHAGE_COLONY_STIMULATING_FACTOR_PRODUCTION	-1.45009	0.0764706	0.107515	-1.4277	0.0491132	0.192187
REACTOME_G_ALPHA_Z_SIGNALLING_EVENTS	1.18607	0.209163	0.552358	-1.42759	0.0340376	0.192273
REACTOME_POST_NMDA_RECEPTOR_ACTIVATION_EVENTS	-1.08779	0.329832	0.483268	-1.42759	0.032491	0.192155
GSE24574_BCL6_LOW_TFH_VS_TCONV_CD4_TCELL_UP	-1.22738	0.0824742	0.28435	-1.42759	0.00619835	0.192034
GO_NEGATIVE_REGULATION_OF_MUSCLE_CELL_APOPTOTIC_PROCESS	-0.96831	0.4946	0.726673	-1.42758	0.0378788	0.191926
GO_WOUND_HEALING_SPREADING_OF_EPIDERMAL_CELLS	-1.20721	0.242616	0.307841	-1.42753	0.061693	0.191899
GO_REGULATION_OF_NEUTROPHIL_MIGRATION	-1.53463	0.0325866	0.070221	-1.4274	0.0408922	0.19203
CLASPER_LYMPHATIC_VESSELS_DURING_METASTASIS_UP	1.77684	0.00197628	0.0576405	-1.42728	0.0551378	0.192127
GSE34392_ST2_KO_VS_WT_DAY8_LCMV_EFFECTOR_CD8_TCELL_DN	-1.68567	0	0.0288041	-1.42725	0.00203459	0.192075
DELASERNA_MYOD_TARGETS_UP	1.03249	0.382129	0.786394	-1.42724	0.0238871	0.191961
REACTOME_REGULATION_OF_WATER_BALANCE_BY_RENAL_AQUAPORINS	0.984198	0.489066	0.867183	-1.42718	0.0374269	0.191952
GSE16266_CTRL_VS_LPS_STIM_MEF_DN	-0.901907	0.706967	0.856998	-1.42696	0.00307692	0.192281
GO_MEMBRANE_ASSEMBLY	0.976572	0.490272	0.879444	-1.42694	0.0499343	0.192199
LANDIS_ERBB2_BREAST_TUMORS_65_DN	-1.21282	0.17451	0.300841	-1.42676	0.0343137	0.192416
GSE41867_NAIVE_VS_DAY8_LCMV_ARMSTRONG_EFFECTOR_CD8_TCELL_DN	-1.10363	0.214156	0.456328	-1.42651	0.00306435	0.192796
GO_EXTRACELLULAR_REGULATION_OF_SIGNAL_TRANSDUCTION	-1.05448	0.387097	0.547778	-1.4265	0.048583	0.192696
GSE26030_UNSTIM_VS_RESTIM_TH1_DAY5_POST_POLARIZATION_DN	-1.88742	0	0.00541513	-1.42645	0.00409417	0.192681
GO_T_CELL_DIFFERENTIATION_INVOLVED_IN_IMMUNE_RESPONSE	-2.31881	0	7.61385e-06	-1.42625	0.0432099	0.192972
GO_REGULATION_OF_SECRETION	-1.41525	0	0.126513	-1.42611	0	0.193141
GSE42021_TREG_PLN_VS_TREG_PRECURSORS_THYMUS_DN	-2.35949	0	0	-1.42608	0.00413223	0.193073
GO_MONOVALENT_INORGANIC_CATION_TRANSMEMBRANE_TRANSPORTER_ACTIVITY	-1.11661	0.150905	0.436975	-1.42602	0.00200602	0.193076
GO_HEPARIN_BINDING	-1.62101	0.00194553	0.0431733	-1.42597	0.00748663	0.193059
GO_CELLULAR_RESPONSE_TO_ETHANOL	-0.891539	0.628742	0.876841	-1.42587	0.0587413	0.193127
GO_MULTICELLULAR_ORGANISM_AGING	-1.06062	0.361746	0.535367	-1.42571	0.0317848	0.193317
GSE3720_UNSTIM_VS_LPS_STIM_VD1_GAMMADELTA_TCELL_DN	-1.65694	0	0.0346414	-1.42567	0.00631579	0.193273
BIOCARTA_CLASSIC_PATHWAY	-1.3272	0.145492	0.189567	-1.4255	0.0523256	0.193486
BROWNE_HCMV_INFECTION_4HR_UP	1.12269	0.25	0.635157	-1.4251	0.0291375	0.19419
PRC2_SUZ12_UP.V1_DN	-1.97678	0	0.00193844	-1.4251	0.00941423	0.194072
GO_REGULATION_OF_CELL_MATURATION	0.69208	0.868472	1	-1.42504	0.0511811	0.194052
LE_SKI_TARGETS_DN	1.50607	0.044484	0.222472	-1.42503	0.038633	0.193945
GNF2_RAD23A	-2.17695	0	7.62591e-05	-1.42498	0.0192525	0.193908
GSE17974_CTRL_VS_ACT_IL4_AND_ANTI_IL12_12H_CD4_TCELL_UP	-1.23144	0.0865191	0.279687	-1.42498	0.00208333	0.193796
GO_LIVER_REGENERATION	-1.3621	0.117647	0.162108	-1.42495	0.0673854	0.193745
GO_INTRINSIC_COMPONENT_OF_EXTERNAL_SIDE_OF_PLASMA_MEMBRANE	-1.52701	0.0398406	0.0730604	-1.42492	0.063172	0.193677
THILLAINADESAN_ZNF217_TARGETS_DN	0.879557	0.612476	1	-1.42481	0.0510511	0.193777
GO_REGULATION_OF_MEIOTIC_NUCLEAR_DIVISION	1.55222	0.0261569	0.184712	-1.42474	0.044335	0.193785
GUTIERREZ_CHRONIC_LYMPHOCYTIC_LEUKEMIA_UP	-1.89525	0.00200401	0.00499391	-1.42454	0.0569801	0.194037
GSE37416_12H_VS_24H_F_TULARENSIS_LVS_NEUTROPHIL_UP	-2.01116	0	0.00121029	-1.42419	0.0030896	0.194618
GSE17974_IL4_AND_ANTI_IL12_VS_UNTREATED_6H_ACT_CD4_TCELL_UP	-1.15223	0.174349	0.383014	-1.42414	0.00947368	0.194603
GSE13738_TCR_VS_BYSTANDER_ACTIVATED_CD4_TCELL_DN	-2.36849	0	0	-1.42411	0	0.194544
GSE1925_CTRL_VS_IFNG_PRIMED_MACROPHAGE_3H_IFNG_STIM_DN	-1.08836	0.289206	0.482531	-1.42398	0.0114703	0.194678
GO_REGULATION_OF_OSTEOBLAST_PROLIFERATION	1.45158	0.07393	0.275149	-1.42397	0.0509554	0.194581
GO_DOUBLE_STRANDED_RNA_BINDING	-1.34776	0.0471513	0.173022	-1.42396	0.0246769	0.194464
ROY_WOUND_BLOOD_VESSEL_DN	-1.13322	0.297131	0.409869	-1.42396	0.0583333	0.194355
WANG_METASTASIS_OF_BREAST_CANCER_ESR1_DN	-1.4423	0.0631365	0.111461	-1.4238	0.0523039	0.194533
GO_POSITIVE_REGULATION_OF_REACTIVE_OXYGEN_SPECIES_BIOSYNTHETIC_PROCESS	-1.46302	0.0274841	0.101435	-1.42374	0.0312876	0.194532
GO_REGULATION_OF_MEIOTIC_CELL_CYCLE	1.38048	0.062249	0.337826	-1.42374	0.0336943	0.194416
GO_NEGATIVE_REGULATION_OF_T_CELL_APOPTOTIC_PROCESS	-1.56736	0.0193548	0.0588497	-1.42364	0.0630749	0.19449
GO_REGULATION_OF_REPRODUCTIVE_PROCESS	1.13992	0.190196	0.60937	-1.42342	0.0137858	0.194813
MODULE_44	-2.38366	0	0	-1.42321	0.00101112	0.195102
GO_CONNEXON_COMPLEX	1.70084	0.00760456	0.0879445	-1.42319	0.0470914	0.195029
KEEN_RESPONSE_TO_ROSIGLITAZONE_DN	-0.91663	0.640974	0.832051	-1.42297	0.0181818	0.195349
REACTOME_KERATAN_SULFATE_KERATIN_METABOLISM	0.912956	0.562376	0.990333	-1.42293	0.053021	0.195306
GO_NEGATIVE_REGULATION_OF_MULTI_ORGANISM_PROCESS	-1.81257	0	0.010745	-1.42292	0.0074389	0.195208
MODULE_27	-2.63235	0	0	-1.42274	0	0.195455
GO_REGULATION_OF_VACUOLAR_TRANSPORT	-0.853346	0.704453	0.934223	-1.42264	0.0371287	0.195535
GO_LEUKOTRIENE_BIOSYNTHETIC_PROCESS	-1.15891	0.281573	0.373412	-1.42263	0.058745	0.195453
HUANG_GATA2_TARGETS_DN	0.971471	0.510806	0.888404	-1.42253	0.0166482	0.195524
OXFORD_RALA_AND_RALB_TARGETS_DN	-1.49754	0.0607966	0.0855355	-1.4224	0.0626781	0.195665
GO_REGULATION_OF_MHC_CLASS_II_BIOSYNTHETIC_PROCESS	-1.26686	0.18107	0.241243	-1.42236	0.0597015	0.195638
RICKMAN_TUMOR_DIFFERENTIATED_WELL_VS_POORLY_DN	-1.5741	0.00198413	0.0568264	-1.42234	0	0.19555
GSE30083_SP1_VS_SP4_THYMOCYTE_DN	-2.37151	0	0	-1.42213	0.00720906	0.195829
REACTOME_DEGRADATION_OF_THE_EXTRACELLULAR_MATRIX	1.06591	0.345631	0.724094	-1.42185	0.0594937	0.196282
GSE14386_UNTREATED_VS_IFNA_TREATED_ACT_PBMC_MS_PATIENT_UP	-1.28455	0.0675422	0.225025	-1.42176	0.00422387	0.196344
GSE27786_LIN_NEG_VS_MONO_MAC_DN	-1.88541	0	0.00549999	-1.42158	0	0.19657
GSE6259_33D1_POS_VS_DEC205_POS_FLT3L_INDUCED_SPLENIC_DC_UP	-1.50573	0	0.0818841	-1.42131	0.00310559	0.197001
GO_NEGATIVE_REGULATION_OF_MAST_CELL_ACTIVATION	-0.924421	0.570842	0.816903	-1.42112	0.0540541	0.197247
GO_SCAVENGER_RECEPTOR_ACTIVITY	-1.8368	0.00205761	0.00869665	-1.42097	0.03663	0.197402
GO_PLATELET_DENSE_GRANULE	0.888666	0.627057	1	-1.42081	0.0626632	0.197612
GSE3982_BCELL_VS_BASOPHIL_DN	-1.41775	0.00623701	0.125078	-1.4206	0.00628272	0.197904
GO_VOLTAGE_GATED_CHLORIDE_CHANNEL_ACTIVITY	1.2947	0.146154	0.420014	-1.42044	0.0592384	0.198089
GO_BASAL_PART_OF_CELL	-1.2	0.176101	0.31688	-1.42043	0.0220162	0.197994
REACTOME_TRANSPORT_OF_INORGANIC_CATIONS_ANIONS_AND_AMINO_ACIDS_OLIGOPEPTIDES	-1.36192	0.052	0.162208	-1.42038	0.0226293	0.197974
TERAMOTO_OPN_TARGETS_CLUSTER_8	0.837698	0.685885	1	-1.42022	0.0577201	0.198185
GO_REGULATION_OF_MEMBRANE_INVAGINATION	0.624127	0.912621	1	-1.42004	0.0490463	0.198425
NIELSEN_SYNOVIAL_SARCOMA_DN	-2.21637	0	3.57472e-05	-1.41999	0.0576184	0.198399
DELYS_THYROID_CANCER_UP	-1.75578	0	0.0172757	-1.41977	0	0.198714
GSE22886_IL2_VS_IL15_STIM_NKCELL_UP	1.1345	0.168142	0.615977	-1.41959	0.00103734	0.198947
GO_CYTOKINE_MEDIATED_SIGNALING_PATHWAY	-2.22777	0	2.83211e-05	-1.41955	0.001	0.198904
GO_ORGANIC_ANION_TRANSMEMBRANE_TRANSPORTER_ACTIVITY	-1.09963	0.237354	0.46322	-1.41926	0.00419287	0.199392
GO_REGULATION_OF_LYMPHOCYTE_DIFFERENTIATION	-1.98191	0	0.00184213	-1.41907	0.0107181	0.199646
MODULE_396	1.66549	0.025641	0.109211	-1.41905	0.0361635	0.199571
AZARE_NEOPLASTIC_TRANSFORMATION_BY_STAT3_DN	-1.0632	0.386454	0.530469	-1.41904	0.0512129	0.199463
PR_01	-0.928705	0.627219	0.808965	-1.41901	0.00420168	0.199406
GO_CELL_CELL_CONTACT_ZONE	-1.04764	0.374517	0.560746	-1.4189	0.0329171	0.199492
MALONEY_RESPONSE_TO_17AAG_UP	-0.97944	0.477273	0.703367	-1.41888	0.0379437	0.199421
MODULE_433	1.41085	0.0583333	0.309151	-1.41864	0.0241657	0.199781
GO_CARGO_RECEPTOR_ACTIVITY	-1.8854	0	0.00549483	-1.41862	0.0207135	0.199709
GSE9988_ANTI_TREM1_VS_VEHICLE_TREATED_MONOCYTES_DN	-2.75824	0	0	-1.41858	0.00205128	0.199675
GO_SIGNALING_RECEPTOR_ACTIVITY	-2.00988	0	0.00123328	-1.4185	0	0.199709
SENGUPTA_EBNA1_ANTICORRELATED	-2.05842	0	0.000605426	-1.41846	0.00635593	0.199684
YAO_TEMPORAL_RESPONSE_TO_PROGESTERONE_CLUSTER_15	1.36	0.0674603	0.35766	-1.41831	0.0487211	0.199849
REACTOME_POST_CHAPERONIN_TUBULIN_FOLDING_PATHWAY	1.31393	0.128257	0.40427	-1.41825	0.0612517	0.199849
GO_REGULATION_OF_INOSITOL_PHOSPHATE_BIOSYNTHETIC_PROCESS	-1.33686	0.128571	0.181713	-1.41824	0.0591398	0.199751
STK33_SKM_UP	-1.85937	0	0.00701952	-1.4181	0.00101833	0.199907
GSE19198_1H_VS_24H_IL21_TREATED_TCELL_DN	-1.83829	0	0.00859612	-1.41806	0	0.199863
GSE7509_UNSTIM_VS_FCGRIIB_STIM_DC_DN	-2.54147	0	0	-1.41798	0.00315789	0.199914
GSE19888_ADENOSINE_A3R_ACT_VS_TCELL_MEMBRANES_ACT_IN_MAST_CELL_UP	-1.82576	0	0.00958866	-1.41795	0.002079	0.199846
GSE17974_CTRL_VS_ACT_IL4_AND_ANTI_IL12_72H_CD4_TCELL_UP	-1.58359	0	0.0540218	-1.41785	0.00414079	0.199932
ZHANG_TLX_TARGETS_60HR_UP	-1.24818	0.0353635	0.261387	-1.4178	0	0.199923
GO_REGULATION_OF_INTERLEUKIN_6_BIOSYNTHETIC_PROCESS	-1.59275	0.0231579	0.0510193	-1.41779	0.0543046	0.199823
GSE7568_IL4_TGFB_DEXAMETHASONE_VS_IL4_TGFB_TREATED_MACROPHAGE_DN	-1.57753	0	0.0557353	-1.41777	0.0020555	0.199749
GSE9006_TYPE_1_VS_TYPE_2_DIABETES_PBMC_AT_DX_DN	-0.664621	0.998062	1	-1.41773	0.00206612	0.199707
GO_INORGANIC_ANION_EXCHANGER_ACTIVITY	-1.46331	0.0612245	0.101275	-1.41773	0.0576671	0.199588
GO_REGULATION_OF_ION_TRANSPORT	-1.06263	0.221557	0.531444	-1.41742	0	0.200079
PID_IL5_PATHWAY	-1.24369	0.216495	0.266155	-1.41719	0.0589888	0.200423
GO_PROTEIN_CARBOXYLATION	-0.685197	0.876033	1	-1.41687	0.0592287	0.200938
LI_CYTIDINE_ANALOG_PATHWAY	-0.993034	0.497942	0.673472	-1.41672	0.0589812	0.201125
GO_GAP_JUNCTION_CHANNEL_ACTIVITY	1.58586	0.0307102	0.157419	-1.41671	0.0598053	0.201026
GO_CELLULAR_RESPONSE_TO_LIPOPROTEIN_PARTICLE_STIMULUS	-1.71451	0.0105932	0.023584	-1.41668	0.0638889	0.200966
GO_MANGANESE_ION_TRANSPORT	-0.967874	0.528138	0.727682	-1.41643	0.0707351	0.201329
GO_CELL_ACTIVATION_INVOLVED_IN_IMMUNE_RESPONSE	-2.36741	0	0	-1.41623	0.00742312	0.201618
GSE17721_ALL_VS_24H_PAM3CSK4_BMDC_UP	-1.60867	0.0020202	0.0465304	-1.41602	0.00410256	0.201919
GO_ACTIN_BINDING	-1.15614	0.102041	0.377367	-1.41601	0	0.201811
GO_BONE_GROWTH	1.2211	0.214844	0.4983	-1.41595	0.0530504	0.20183
GO_FACE_DEVELOPMENT	1.18026	0.195817	0.558882	-1.41591	0.0291715	0.201785
GSE19198_1H_VS_6H_IL21_TREATED_TCELL_UP	-1.65293	0	0.0354184	-1.41551	0.0096463	0.202465
GO_REGULATION_OF_RENAL_SODIUM_EXCRETION	0.772409	0.800399	1	-1.41549	0.0554804	0.202371
CROONQUIST_IL6_DEPRIVATION_UP	-1.84431	0.00414938	0.00814746	-1.41547	0.0569211	0.202289
ZUCCHI_METASTASIS_DN	1.32662	0.094	0.392938	-1.41526	0.0378698	0.202597
GO_REGULATION_OF_SMOOTH_MUSCLE_CELL_PROLIFERATION	-1.15972	0.187984	0.372057	-1.41516	0.0161812	0.202677
GO_ACTIN_FILAMENT_BASED_MOVEMENT	0.998191	0.462857	0.840774	-1.41497	0.0142232	0.202966
ZIRN_TRETINOIN_RESPONSE_UP	-0.93799	0.535787	0.790009	-1.41492	0.0446429	0.202941
MILICIC_FAMILIAL_ADENOMATOUS_POLYPOSIS_DN	-1.74458	0.0083682	0.018836	-1.41492	0.0500736	0.20283
RODRIGUES_NTN1_AND_DCC_TARGETS	0.867882	0.676191	1	-1.4149	0.0546584	0.202737
GNF2_PECAM1	-2.93178	0	0	-1.4149	0.0258824	0.202628
GO_POSITIVE_REGULATION_OF_INTERLEUKIN_1_BETA_PRODUCTION	-1.88131	0	0.00574748	-1.41478	0.0428212	0.20275
RIGGINS_TAMOXIFEN_RESISTANCE_UP	1.08798	0.270059	0.688562	-1.41461	0.0233074	0.202987
GO_ZYMOGEN_GRANULE	-1.20336	0.228916	0.312837	-1.41455	0.0666667	0.202991
GO_BRANCH_ELONGATION_OF_AN_EPITHELIUM	1.76159	0.00796813	0.0639947	-1.41454	0.0720839	0.202883
GSE3920_IFNA_VS_IFNB_TREATED_ENDOTHELIAL_CELL_DN	-2.0426	0	0.000756398	-1.41451	0.00726895	0.202825
GO_MONOCARBOXYLIC_ACID_BIOSYNTHETIC_PROCESS	0.992893	0.474438	0.851651	-1.41439	0.00419727	0.202963
GSE15735_CTRL_VS_HDAC_INHIBITOR_TREATED_CD4_TCELL_2H_UP	-1.66421	0	0.0331328	-1.41435	0.00102145	0.202934
GO_APICAL_JUNCTION_ASSEMBLY	1.20015	0.178645	0.529407	-1.41429	0.0384168	0.202931
GO_POSITIVE_REGULATION_OF_HAIR_CYCLE	0.878437	0.628205	1	-1.41424	0.0675105	0.202902
GO_SECRETORY_VESICLE	1.083	0.201663	0.696173	-1.414	0	0.203297
GSE3982_DC_VS_MAC_UP	-1.47638	0	0.0951384	-1.41398	0.00514403	0.203202
GSE7831_1H_VS_4H_INFLUENZA_STIM_PDC_DN	-1.4723	0.00387597	0.0969318	-1.41391	0.00512295	0.203202
GO_NEGATIVE_REGULATION_OF_BEHAVIOR	-1.04697	0.39726	0.561914	-1.41391	0.0614152	0.203095
CHR1P22	-1.15056	0.204082	0.385593	-1.41387	0.0182648	0.203065
GSE360_LOW_DOSE_B_MALAYI_VS_M_TUBERCULOSIS_DC_DN	-1.57634	0	0.0560636	-1.4137	0.00413223	0.203271
GAJATE_RESPONSE_TO_TRABECTEDIN_UP	-0.921599	0.595918	0.821629	-1.41369	0.026936	0.203172
MIKKELSEN_NPC_ICP_WITH_H3K27ME3	0.887167	0.606719	1	-1.41365	0.0667614	0.203132
KEGG_PRION_DISEASES	-1.2714	0.148676	0.237253	-1.41363	0.0526316	0.203077
PROVENZANI_METASTASIS_DN	0.877811	0.767442	1	-1.41358	0.0104932	0.203047
GO_RESPONSE_TO_ARSENIC_CONTAINING_SUBSTANCE	0.731073	0.885099	1	-1.41339	0.042236	0.203325
GO_POSITIVE_REGULATION_OF_PEPTIDE_SECRETION	1.27168	0.0826446	0.441907	-1.41329	0.028169	0.203409
GO_PLATELET_DENSE_TUBULAR_NETWORK	-0.798334	0.709544	0.985648	-1.41301	0.0527046	0.20382
BURTON_ADIPOGENESIS_PEAK_AT_0HR	1.23764	0.133462	0.479135	-1.41301	0.023622	0.203706
GO_REGULATION_OF_NITRIC_OXIDE_BIOSYNTHETIC_PROCESS	-1.2332	0.172414	0.277605	-1.41295	0.0424799	0.203709
GO_REGULATION_OF_SYSTEMIC_ARTERIAL_BLOOD_PRESSURE_MEDIATED_BY_A_CHEMICAL_SIGNAL	0.859226	0.720532	1	-1.41292	0.0447059	0.203651
GSE24634_IL4_VS_CTRL_TREATED_NAIVE_CD4_TCELL_DAY5_DN	-2.34652	0	4.10988e-06	-1.41284	0.00515996	0.203705
STK33_UP	-1.79148	0	0.0129117	-1.41282	0.00101523	0.203624
ABDULRAHMAN_KIDNEY_CANCER_VHL_DN	-1.09643	0.337526	0.469013	-1.41267	0.0608575	0.203828
GO_INTEGRIN_BINDING	-1.19544	0.141988	0.322331	-1.41264	0.0150215	0.203792
GSE37605_FOXP3_FUSION_GFP_VS_IRES_GFP_TREG_NOD_DN	-2.00835	0	0.00127851	-1.4126	0.00827301	0.20375
HALLMARK_COMPLEMENT	-2.18559	0	6.52212e-05	-1.41247	0.00620476	0.203877
KRAS.600.LUNG.BREAST_UP.V1_DN	-1.45574	0.00411523	0.10459	-1.41236	0.00204918	0.203983
GO_REGULATION_OF_MONOCYTE_CHEMOTAXIS	-1.76671	0.0101833	0.0158784	-1.41235	0.0583756	0.20388
GO_TRANSMEMBRANE_TRANSPORTER_ACTIVITY	-1.14858	0.0496183	0.38789	-1.41212	0	0.204223
GO_POSITIVE_REGULATION_OF_TRANSPORTER_ACTIVITY	-0.898354	0.635438	0.863977	-1.41212	0.0206746	0.204117
GCM_PTPRU	1.28179	0.112621	0.432594	-1.4121	0.03125	0.204023
GNF2_MSN	-1.52423	0.0318471	0.0742012	-1.41205	0.0725	0.204023
GO_ADENYLATE_CYCLASE_ACTIVATING_G_PROTEIN_COUPLED_RECEPTOR_SIGNALING_PATHWAY	1.63818	0.01	0.126386	-1.41202	0.0355097	0.203962
RUTELLA_RESPONSE_TO_CSF2RB_AND_IL4_DN	-2.48057	0	0	-1.41189	0	0.204099
GO_PHOSPHATIDYLINOSITOL_3_PHOSPHATE_BIOSYNTHETIC_PROCESS	0.852291	0.727799	1	-1.41175	0.0327485	0.204232
VALK_AML_CLUSTER_1	1.55509	0.0254902	0.184755	-1.41163	0.0489691	0.204376
GSE13762_CTRL_VS_125_VITAMIND_DAY5_DC_UP	-1.43605	0.0143443	0.114737	-1.41154	0.0128068	0.204456
GO_REGULATION_OF_CATION_CHANNEL_ACTIVITY	0.792028	0.899396	1	-1.41152	0.0130577	0.204378
GO_FRUCTOSE_METABOLIC_PROCESS	-0.887836	0.608871	0.882869	-1.41139	0.0600273	0.204534
SRF_Q5_01	0.951287	0.607004	0.929396	-1.41118	0.00102564	0.204834
WIEDERSCHAIN_TARGETS_OF_BMI1_AND_PCGF2	1.34542	0.0847784	0.376178	-1.41095	0.0353881	0.205185
GO_NEGATIVE_REGULATION_OF_CELL_MATRIX_ADHESION	-0.783395	0.810865	0.99604	-1.41079	0.0588235	0.205395
GOUYER_TATI_TARGETS_UP	-1.11897	0.323711	0.433495	-1.41076	0.0553892	0.20534
BROWNE_HCMV_INFECTION_24HR_DN	-0.921906	0.651394	0.821367	-1.41062	0.00840336	0.205506
CHEOK_RESPONSE_TO_MERCAPTOPURINE_DN	-1.4187	0.0622407	0.124483	-1.41057	0.0550336	0.205485
GSE5589_IL6_KO_VS_IL10_KO_LPS_AND_IL10_STIM_MACROPHAGE_45MIN_UP	-1.27375	0.0467091	0.235194	-1.41049	0.0061287	0.205527
REACTOME_GAP_JUNCTION_ASSEMBLY	1.64901	0.0217391	0.120552	-1.41048	0.0615165	0.205434
GSE40274_XBP1_VS_FOXP3_AND_XBP1_TRANSDUCED_ACTIVATED_CD4_TCELL_UP	-1.75575	0	0.0172692	-1.41045	0.00205128	0.205363
GO_REGULATION_OF_CALCIUM_ION_TRANSPORT	-1.19817	0.0684105	0.319173	-1.41038	0.00413223	0.205393
GSE33425_CD161_INT_VS_NEG_CD8_TCELL_DN	-1.78587	0	0.0134967	-1.41029	0	0.205469
GO_MELANIN_METABOLIC_PROCESS	-0.757548	0.803838	1	-1.41011	0.0563003	0.2057
GSE1432_1H_VS_24H_IFNG_MICROGLIA_DN	-2.4343	0	0	-1.4101	0.00417101	0.205601
NAKAMURA_BRONCHIAL_AND_BRONCHIOLAR_EPITHELIA	0.832903	0.677543	1	-1.41009	0.0456621	0.205492
SMID_BREAST_CANCER_NORMAL_LIKE_UP	-2.53934	0	0	-1.41006	0	0.205442
GCM_LTK	-1.21502	0.181034	0.297962	-1.40999	0.0593939	0.205452
GSE37301_MULTIPOTENT_PROGENITOR_VS_GRAN_MONO_PROGENITOR_DN	-1.82463	0	0.00969891	-1.40991	0.00102459	0.20552
GO_ACTIVATION_OF_IMMUNE_RESPONSE	-2.54184	0	0	-1.40989	0	0.205434
GSE7348_UNSTIM_VS_LPS_STIM_MACROPHAGE_DN	-1.43101	0.00988142	0.11748	-1.40985	0.00414508	0.20539
GO_REGULATION_OF_CELLULAR_COMPONENT_MOVEMENT	-1.4695	0	0.0982963	-1.4095	0	0.205963
GSE24142_EARLY_THYMIC_PROGENITOR_VS_DN2_THYMOCYTE_FETAL_DN	-1.48543	0.0104167	0.091297	-1.40934	0.00207039	0.206184
GSE24142_DN2_VS_DN3_THYMOCYTE_ADULT_UP	-1.10697	0.223507	0.450913	-1.40934	0.00411946	0.206077
ZHAN_MULTIPLE_MYELOMA_DN	-1.84521	0	0.00805559	-1.40933	0.0536353	0.205982
GSE6259_FLT3L_INDUCED_DEC205_POS_DC_VS_CD8_TCELL_UP	-1.59699	0.00380228	0.049807	-1.40929	0.0126716	0.205931
GSE23568_ID3_KO_VS_WT_CD8_TCELL_DN	-1.73853	0	0.0197819	-1.40919	0.00410256	0.206023
GO_PEPTIDASE_INHIBITOR_ACTIVITY	-1.67141	0	0.0316126	-1.40914	0.00847458	0.206019
GO_BASAL_PLASMA_MEMBRANE	1.02094	0.410609	0.805323	-1.40907	0.0383189	0.206049
GSE39556_UNTREATED_VS_3H_POLYIC_INJ_MOUSE_CD8A_DC_DN	-1.14822	0.15587	0.388149	-1.40901	0.00102145	0.206044
MODULE_342	-1.47223	0.00642398	0.0969417	-1.40861	0.00310559	0.206726
GSE15930_NAIVE_VS_48H_IN_VITRO_STIM_IL12_CD8_TCELL_UP	-1.3805	0.00996016	0.149037	-1.40846	0.00414508	0.206932
TTCYNRGAA_STAT5B_01	-1.91038	0	0.00421984	-1.40839	0.00826446	0.206954
UROSEVIC_RESPONSE_TO_IMIQUIMOD	-2.35502	0	0	-1.4079	0.0660502	0.20785
ATF2_UP.V1_UP	1.19859	0.11985	0.531566	-1.40771	0.0041841	0.208142
GSE16385_UNTREATED_VS_12H_IFNG_TNF_TREATED_MACROPHAGE_UP	-0.911685	0.682281	0.840534	-1.40764	0.00831601	0.208187
BOYAULT_LIVER_CANCER_SUBCLASS_G1_DN	-0.975026	0.480808	0.713674	-1.40763	0.0304507	0.208089
GSE24142_ADULT_VS_FETAL_EARLY_THYMIC_PROGENITOR_UP	-1.96663	0	0.00219336	-1.40728	0.00616016	0.208713
GSE37605_TREG_VS_TCONV_NOD_FOXP3_FUSION_GFP_DN	-1.0473	0.328358	0.561279	-1.40725	0.0072314	0.20864
GO_REGULATION_OF_DIGESTIVE_SYSTEM_PROCESS	0.73492	0.880769	1	-1.40722	0.0535932	0.208604
GO_REGULATION_OF_EXOCYTOSIS	1.07203	0.282983	0.713755	-1.40716	0.00623701	0.2086
WEBER_METHYLATED_HCP_IN_FIBROBLAST_DN	1.13343	0.2846	0.616888	-1.40716	0.0648259	0.208484
GSE24634_TEFF_VS_TCONV_DAY5_IN_CULTURE_DN	-2.26477	0	1.27022e-05	-1.40712	0.00934579	0.208465
GSE29615_DAY3_VS_DAY7_LAIV_FLU_VACCINE_PBMC_UP	-1.10489	0.237603	0.454243	-1.40712	0.0136555	0.208348
GO_INTERLEUKIN_1_PRODUCTION	-1.45475	0.064257	0.105227	-1.40704	0.0614973	0.208389
GO_VOLTAGE_GATED_ANION_CHANNEL_ACTIVITY	1.00515	0.442446	0.830644	-1.40701	0.0653333	0.208339
GO_CELLULAR_RESPONSE_TO_ACID_CHEMICAL	-1.36995	0.0194805	0.156679	-1.407	0.0123457	0.208232
GO_CEREBELLAR_CORTEX_MORPHOGENESIS	-1.35445	0.0883534	0.168172	-1.40692	0.0485934	0.208303
GSE34205_HEALTHY_VS_FLU_INF_INFANT_PBMC_DN	-1.97707	0	0.001937	-1.40685	0.00411946	0.208324
GO_CALCIUM_ION_TRANSMEMBRANE_TRANSPORT	-1.52292	0.00192678	0.0747008	-1.40684	0.00524109	0.208222
MIKKELSEN_NPC_LCP_WITH_H3K4ME3	-1.11645	0.277886	0.437077	-1.40683	0.0357968	0.208134
GO_POSITIVE_REGULATION_OF_INTERFERON_GAMMA_PRODUCTION	-2.22838	0	2.85762e-05	-1.40679	0.030647	0.20808
ACEVEDO_FGFR1_TARGETS_IN_PROSTATE_CANCER_MODEL_UP	-1.30183	0.0162602	0.210007	-1.40664	0.00202429	0.208256
GO_ALCOHOL_DEHYDROGENASE_NADP_ACTIVITY	1.14335	0.261194	0.605546	-1.4065	0.0643777	0.208433
GSE2405_0H_VS_3H_A_PHAGOCYTOPHILUM_STIM_NEUTROPHIL_UP	-1.42736	0.00996016	0.119521	-1.40633	0.00411523	0.208639
GO_RHODOPSIN_MEDIATED_SIGNALING_PATHWAY	0.700081	0.86	1	-1.40631	0.0742779	0.208564
MODULE_521	1.02562	0.437376	0.797965	-1.40613	0.0562347	0.208784
GO_POSITIVE_REGULATION_OF_PEPTIDYL_THREONINE_PHOSPHORYLATION	0.72441	0.865784	1	-1.40609	0.0730479	0.208761
ODONNELL_TFRC_TARGETS_UP	-1.22726	0.0479167	0.284321	-1.40604	0	0.208742
SEIKE_LUNG_CANCER_POOR_SURVIVAL	-0.934883	0.556485	0.795877	-1.40574	0.068917	0.209231
GO_RHO_GUANYL_NUCLEOTIDE_EXCHANGE_FACTOR_ACTIVITY	-1.6558	0.00412371	0.0347763	-1.40574	0.0233593	0.209115
RUAN_RESPONSE_TO_TNF_DN	-0.770786	0.897751	1	-1.40565	0.0142077	0.209182
WANG_SMARCE1_TARGETS_UP	1.19324	0.0671785	0.540811	-1.40539	0.00100908	0.209596
GO_NATURAL_KILLER_CELL_ACTIVATION	-2.41004	0	0	-1.40519	0.0476191	0.209913
REACTOME_SIGNALING_BY_RHO_GTPASES	-1.29218	0.0591603	0.219069	-1.40515	0.00849257	0.209874
GSE14415_NATURAL_TREG_VS_FOXP3_KO_NATURAL_TREG_UP	-1.96628	0	0.00220398	-1.40497	0.0125523	0.210146
GSE43863_NAIVE_VS_MEMORY_LY6C_INT_CXCR5POS_CD4_TCELL_D150_LCMV_UP	-1.69816	0	0.0263838	-1.40493	0.00204918	0.2101
GO_REGULATION_OF_INTERFERON_GAMMA_PRODUCTION	-2.18061	0	7.43744e-05	-1.40492	0.0206074	0.210017
REACTOME_UNBLOCKING_OF_NMDA_RECEPTOR_GLUTAMATE_BINDING_AND_ACTIVATION	0.918849	0.588235	0.983321	-1.40479	0.0554054	0.210153
GSE6269_HEALTHY_VS_FLU_INF_PBMC_DN	-2.24573	0	2.10782e-05	-1.40464	0.00838574	0.210323
GSE24574_BCL6_HIGH_TFH_VS_TCONV_CD4_TCELL_DN	-1.979	0	0.00191608	-1.40454	0.00834202	0.210398
KEGG_PHOSPHATIDYLINOSITOL_SIGNALING_SYSTEM	-1.04518	0.368098	0.565063	-1.40447	0.0295791	0.210443
VALK_AML_CLUSTER_16	-0.970172	0.490909	0.723154	-1.40445	0.0629012	0.210359
GO_CARBOHYDRATE_DERIVATIVE_TRANSPORTER_ACTIVITY	-0.842335	0.707171	0.945458	-1.40438	0.0605686	0.210391
GO_REGULATION_OF_NATURAL_KILLER_CELL_ACTIVATION	-1.79327	0.00209644	0.012732	-1.40416	0.0523627	0.210717
GO_POSITIVE_REGULATION_OF_EPITHELIAL_CELL_MIGRATION	1.04384	0.366142	0.770119	-1.40416	0.0239391	0.210607
GSE14413_UNSTIM_VS_IFNB_STIM_L929_CELLS_UP	-1.26798	0.0935114	0.24052	-1.40386	0.0182208	0.211119
MODULE_165	-1.98774	0	0.00168967	-1.40366	0.0315315	0.211402
GSE43955_1H_VS_42H_ACT_CD4_TCELL_DN	-1.36222	0.0147368	0.162068	-1.40358	0.00103306	0.211445
GO_CELLULAR_CARBOHYDRATE_CATABOLIC_PROCESS	-1.16296	0.253521	0.36697	-1.40351	0.0570388	0.21148
GSE6674_UNSTIM_VS_CPG_STIM_BCELL_UP	-1.80829	0	0.0111804	-1.40348	0.0168599	0.211435
XU_HGF_SIGNALING_NOT_VIA_AKT1_48HR_UP	-1.18206	0.211946	0.340583	-1.40338	0.0445783	0.21152
TCGATGG_MIR213	0.921759	0.580524	0.979263	-1.40332	0.0325581	0.211517
LU_AGING_BRAIN_UP	-0.923894	0.708661	0.817997	-1.40324	0.00303644	0.211552
GO_POSITIVE_REGULATION_OF_FIBROBLAST_MIGRATION	-1.12599	0.321792	0.421488	-1.40296	0.0547196	0.212036
GO_REGULATION_OF_DEFENSE_RESPONSE	-2.19935	0	4.96929e-05	-1.40279	0	0.212302
GSE18281_CORTICAL_THYMOCYTE_VS_WHOLE_CORTEX_THYMUS_UP	1.10143	0.230143	0.670994	-1.40278	0.0104275	0.212202
GSE6259_FLT3L_INDUCED_VS_WT_SPLENIC_DC_33D1_POS_DN	-1.09856	0.23617	0.465159	-1.40276	0.0072314	0.212121
TSUNODA_CISPLATIN_RESISTANCE_DN	0.995728	0.451056	0.845105	-1.40275	0.0398593	0.212022
GSE7768_OVA_ALONE_VS_OVA_WITH_LPS_IMMUNIZED_MOUSE_WHOLE_SPLEEN_6H_DN	-1.86806	0	0.00647782	-1.40266	0.00828157	0.212085
SCHRAMM_INHBA_TARGETS_UP	-1.01144	0.450902	0.63287	-1.40257	0.0611354	0.212167
GO_SODIUM_ION_HOMEOSTASIS	-1.71914	0.00665188	0.0228499	-1.40253	0.0559796	0.212132
GO_CYTOKINE_SECRETION	-2.22564	0	3.0957e-05	-1.40249	0.0495169	0.212108
GO_REGULATION_OF_PROTEIN_TYROSINE_KINASE_ACTIVITY	-1.28513	0.0965092	0.224506	-1.4023	0.0383747	0.212412
FRIDMAN_IMMORTALIZATION_DN	-1.05199	0.368313	0.552614	-1.40225	0.0528211	0.212377
GO_EXTRACELLULAR_SPACE	-1.62938	0	0.0409623	-1.40219	0	0.212385
REACTOME_INSULIN_RECEPTOR_RECYCLING	-0.88612	0.620202	0.886338	-1.40178	0.0601023	0.213168
GO_INTRACELLULAR_CALCIUM_ACTIVATED_CHLORIDE_CHANNEL_ACTIVITY	-1.07283	0.355556	0.510188	-1.40163	0.0612517	0.213372
GO_REGULATION_OF_RESPIRATORY_SYSTEM_PROCESS	-1.61487	0.0240175	0.0447709	-1.40161	0.0736111	0.213303
GO_LIPID_LOCALIZATION	-0.985613	0.492784	0.689631	-1.40153	0	0.213349
GSE3982_DC_VS_EFF_MEMORY_CD4_TCELL_UP	-1.75623	0	0.0172591	-1.40151	0.0020555	0.21327
MYAATNNNNNNNGGC_UNKNOWN	-0.972495	0.530568	0.717995	-1.40136	0.00100503	0.213472
GO_INORGANIC_CATION_TRANSMEMBRANE_TRANSPORTER_ACTIVITY	-1.19497	0.047817	0.322662	-1.40128	0	0.213535
GO_REGULATION_BY_VIRUS_OF_VIRAL_PROTEIN_LEVELS_IN_HOST_CELL	-1.92403	0.0021097	0.00365561	-1.40106	0.0678925	0.213873
GSE3982_BASOPHIL_VS_EFF_MEMORY_CD4_TCELL_UP	-0.853811	0.878906	0.9339	-1.40083	0.00620476	0.214223
GO_TRANSPORTER_COMPLEX	1.08211	0.245361	0.697097	-1.40077	0.0020284	0.214247
GSE3982_MAST_CELL_VS_NEUTROPHIL_DN	-1.98342	0	0.00179678	-1.40011	0.0041365	0.21554
REACTOME_TGF_BETA_RECEPTOR_SIGNALING_IN_EMT_EPITHELIAL_TO_MESENCHYMAL_TRANSITION	0.496059	0.982353	1	-1.39994	0.0574555	0.215775
GO_POSITIVE_REGULATION_OF_ENDOCYTOSIS	-0.871275	0.761079	0.909635	-1.39983	0.018143	0.215905
GO_NEGATIVE_REGULATION_OF_NATURAL_KILLER_CELL_MEDIATED_IMMUNITY	-1.70631	0.016129	0.0249788	-1.39973	0.0556348	0.215991
NUMATA_CSF3_SIGNALING_VIA_STAT3	-1.1907	0.224762	0.328951	-1.39926	0.0715198	0.216911
GSE3982_NEUTROPHIL_VS_CENT_MEMORY_CD4_TCELL_UP	-2.1231	0	0.000199389	-1.39924	0.0041365	0.21684
GSE18791_CTRL_VS_NEWCASTLE_VIRUS_DC_4H_DN	-2.11879	0	0.000210155	-1.39917	0.00630252	0.216863
GO_INFLAMMATORY_RESPONSE_TO_ANTIGENIC_STIMULUS	-1.49795	0.0406852	0.0853794	-1.39915	0.0777917	0.216811
CHR9Q21	0.858856	0.712381	1	-1.39906	0.0573171	0.216855
GO_NEGATIVE_REGULATION_OF_LEUKOCYTE_DEGRANULATION	-1.25679	0.198312	0.251116	-1.39899	0.0670391	0.21689
GSE41867_DAY6_VS_DAY15_LCMV_ARMSTRONG_EFFECTOR_CD8_TCELL_UP	-1.50419	0.00591716	0.0825438	-1.39871	0.0104384	0.217377
GO_REGULATION_OF_DEFENSE_RESPONSE_TO_BACTERIUM	0.844406	0.694391	1	-1.3986	0.0686131	0.217479
GSE21360_NAIVE_VS_SECONDARY_MEMORY_CD8_TCELL_UP	-1.67689	0	0.0305327	-1.39856	0.00206398	0.217448
KEGG_AUTOIMMUNE_THYROID_DISEASE	-1.96095	0	0.00236249	-1.39851	0.0608466	0.217434
CHEMELLO_SOLEUS_VS_EDL_MYOFIBERS_UP	1.48857	0.0383838	0.23984	-1.39844	0.0535932	0.21747
GO_TOLERANCE_INDUCTION	-2.08513	0	0.000354805	-1.39813	0.0630252	0.218021
GSE42021_CD24INT_VS_CD24LOW_TREG_THYMUS_DN	-2.08789	0	0.000341178	-1.3981	0.00831601	0.217987
GO_G_PROTEIN_COUPLED_RECEPTOR_SIGNALING_PATHWAY	-1.73962	0	0.0196344	-1.39805	0	0.217975
GO_POSITIVE_REGULATION_OF_TRANSPORT	-1.47422	0	0.0961153	-1.39797	0	0.218038
NELSON_RESPONSE_TO_ANDROGEN_UP	-0.810981	0.865217	0.97609	-1.39794	0.0210877	0.217966
BASSO_HAIRY_CELL_LEUKEMIA_UP	-1.52759	0.0139165	0.072939	-1.39792	0.0236487	0.217894
JIANG_TIP30_TARGETS_DN	1.21193	0.207819	0.511449	-1.39789	0.0755668	0.217834
GSE15930_NAIVE_VS_24H_IN_VITRO_STIM_IL12_CD8_TCELL_UP	-1.23692	0.0724346	0.273916	-1.39789	0.00819672	0.217718
GSE9946_MATURE_STIMULATORY_VS_LISTERIA_INF_MATURE_DC_DN	-1.005	0.430255	0.646672	-1.39785	0.019334	0.217686
TAKEDA_TARGETS_OF_NUP98_HOXA9_FUSION_16D_UP	-2.2859	0	6.8199e-06	-1.39781	0.00517598	0.217666
GO_SPECIFICATION_OF_ORGAN_IDENTITY	1.11739	0.324376	0.641839	-1.39775	0.0591549	0.217679
DAVICIONI_TARGETS_OF_PAX_FOXO1_FUSIONS_UP	1.17876	0.0900196	0.562141	-1.39774	0.00303951	0.217586
GO_NEPHRON_TUBULE_FORMATION	0.756534	0.794521	1	-1.39764	0.068306	0.217689
GO_ALCOHOL_CATABOLIC_PROCESS	-0.842686	0.75813	0.945139	-1.39718	0.0347625	0.218506
LEE_LIVER_CANCER_SURVIVAL_UP	-1.17215	0.134357	0.35446	-1.39717	0.00733753	0.218414
MCCLUNG_DELTA_FOSB_TARGETS_2WK	1.46035	0.0427699	0.267239	-1.39709	0.0473934	0.218483
GO_POSITIVE_REGULATION_OF_VIRAL_GENOME_REPLICATION	-0.88469	0.649805	0.888619	-1.39705	0.0556931	0.218436
GO_POSITIVE_REGULATION_OF_LYASE_ACTIVITY	0.992917	0.475746	0.851788	-1.39699	0.0530565	0.218453
GO_POSITIVE_REGULATION_OF_POTASSIUM_ION_TRANSPORT	-1.31337	0.0983607	0.200789	-1.39684	0.0560292	0.218684
GSE45365_WT_VS_IFNAR_KO_BCELL_MCMV_INFECTION_DN	1.31507	0.0254902	0.402337	-1.39668	0.00828157	0.218912
GSE22886_TCELL_VS_BCELL_NAIVE_DN	-1.44738	0.00401606	0.108812	-1.39663	0.00922131	0.218904
GO_CELL_CELL_ADHESION	-1.65567	0	0.0347947	-1.39659	0	0.218888
GO_POSITIVE_REGULATION_OF_INSULIN_SECRETION_INVOLVED_IN_CELLULAR_RESPONSE_TO_GLUCOSE_STIMULUS	0.843409	0.673152	1	-1.39658	0.0569536	0.218773
GSE2770_IL12_VS_TGFB_AND_IL12_TREATED_ACT_CD4_TCELL_2H_DN	0.825476	0.8875	1	-1.39649	0.0148148	0.218852
BOYLAN_MULTIPLE_MYELOMA_D_CLUSTER_DN	-0.875281	0.680392	0.903348	-1.39633	0.057554	0.219098
GO_PHOTORECEPTOR_INNER_SEGMENT	0.68565	0.92803	1	-1.39617	0.0618932	0.219324
GO_POSITIVE_REGULATION_OF_FIBROBLAST_PROLIFERATION	1.60187	0.00769231	0.148148	-1.39611	0.0324826	0.219336
GO_REACTIVE_OXYGEN_SPECIES_BIOSYNTHETIC_PROCESS	1.13405	0.291667	0.616264	-1.39598	0.0557717	0.219532
PID_ARF6_PATHWAY	0.845344	0.71619	1	-1.3959	0.0527607	0.219569
GSE24026_PD1_LIGATION_VS_CTRL_IN_ACT_TCELL_LINE_UP	-1.81162	0	0.0108358	-1.39588	0.00830737	0.219517
GSE34156_UNTREATED_VS_6H_NOD2_LIGAND_TREATED_MONOCYTE_DN	-1.55973	0.00390625	0.0611967	-1.39581	0.00732218	0.219551
GSE27786_LSK_VS_NEUTROPHIL_DN	-1.31942	0.0306122	0.196297	-1.39559	0.00517598	0.219907
MEISSNER_NPC_HCP_WITH_H3K4ME3_AND_H3K27ME3	-1.48537	0.00203252	0.0913066	-1.39543	0.0105374	0.220137
GSE3982_MAST_CELL_VS_DC_DN	-2.01136	0	0.00120854	-1.39525	0.00414508	0.220424
GO_PHOSPHOLIPID_SCRAMBLING	-1.32075	0.141988	0.195335	-1.39514	0.0875706	0.220547
GSE30971_WBP7_HET_VS_KO_MACROPHAGE_2H_LPS_STIM_UP	-1.86212	0	0.00683934	-1.39507	0.00310238	0.22057
GO_POSITIVE_REGULATION_OF_CALCIUM_ION_TRANSPORT	-1.2662	0.0802469	0.241874	-1.39507	0.0173724	0.220467
GO_DISRUPTION_OF_CELLS_OF_OTHER_ORGANISM_INVOLVED_IN_SYMBIOTIC_INTERACTION	-1.45576	0.0750552	0.104611	-1.39484	0.0506329	0.220836
GO_ENDOTHELIAL_CELL_DEVELOPMENT	0.763193	0.875954	1	-1.39464	0.0393975	0.221142
GSE15215_CD2_POS_VS_NEG_PDC_UP	-1.50607	0.00204499	0.0817293	-1.3945	0.0102564	0.221362
GO_PEPTIDYL_PROLINE_HYDROXYLATION	0.746861	0.814815	1	-1.39441	0.083682	0.221436
KRAS.300_UP.V1_UP	-1.32267	0.0411523	0.193829	-1.39429	0.0195652	0.221587
GSE16755_CTRL_VS_IFNA_TREATED_MAC_DN	-2.14073	0	0.000141713	-1.39427	0.00416667	0.221511
GO_HYDROGEN_PEROXIDE_METABOLIC_PROCESS	1.41977	0.0611855	0.301	-1.39427	0.0476191	0.221402
GO_CELLULAR_RESPONSE_TO_PROSTAGLANDIN_STIMULUS	-1.41508	0.0824295	0.126608	-1.39427	0.0571429	0.221292
CHIARADONNA_NEOPLASTIC_TRANSFORMATION_KRAS_CDC25_UP	1.10673	0.274747	0.661622	-1.3942	0.0372093	0.221305
GSE33424_CD161_INT_VS_NEG_CD8_TCELL_DN	-1.24366	0.0684647	0.26614	-1.39416	0.00514933	0.221287
GSE10239_NAIVE_VS_MEMORY_CD8_TCELL_DN	-1.56975	0.00200803	0.058021	-1.39415	0.00206186	0.221184
REACTOME_TRAF3_DEPENDENT_IRF_ACTIVATION_PATHWAY	-1.67472	0.0143149	0.0309524	-1.39414	0.0700809	0.221098
SUMI_HNF4A_TARGETS	-1.26454	0.142566	0.243568	-1.39399	0.0684411	0.221298
MAINA_HYPOXIA_VHL_TARGETS_UP	-0.477722	0.985626	1	-1.39382	0.0625954	0.221554
GO_EARLY_ENDOSOME_MEMBRANE	-1.46309	0.0155945	0.101414	-1.39374	0.02407	0.22161
WU_SILENCED_BY_METHYLATION_IN_BLADDER_CANCER	-1.50819	0.0264228	0.0809083	-1.39358	0.0518602	0.221818
GSE44955_MCSF_VS_MCSF_AND_IL27_STIM_MACROPHAGE_UP	-1.79238	0	0.0128164	-1.39342	0.00822199	0.22203
GSE43955_1H_VS_20H_ACT_CD4_TCELL_WITH_TGFB_IL6_DN	-1.28758	0.0289017	0.223028	-1.393	0.00410678	0.222804
BROWNE_HCMV_INFECTION_8HR_UP	-1.26538	0.0991189	0.242537	-1.3928	0.0206297	0.223103
GO_POSITIVE_REGULATION_OF_INTERLEUKIN_6_PRODUCTION	-1.53924	0.0187891	0.0685778	-1.39275	0.03367	0.223078
GSE41978_ID2_KO_VS_BIM_KO_KLRG1_LOW_EFFECTOR_CD8_TCELL_UP	-2.15623	0	0.000112511	-1.39261	0.00724638	0.22327
GSE11057_NAIVE_VS_CENT_MEMORY_CD4_TCELL_DN	-2.3835	0	0	-1.39253	0.00614754	0.223287
ATM_DN.V1_DN	-1.75582	0	0.0172814	-1.39251	0.0202128	0.223237
KOBAYASHI_EGFR_SIGNALING_24HR_UP	-1.53236	0.00394477	0.0711626	-1.3925	0.0199557	0.223131
MCCLUNG_CREB1_TARGETS_UP	1.32081	0.0557692	0.39612	-1.39244	0.01726	0.223154
LEE_LIVER_CANCER_MYC_E2F1_DN	1.42962	0.0359168	0.294655	-1.39232	0.032147	0.223303
TSENG_IRS1_TARGETS_DN	1.10559	0.241715	0.663749	-1.39228	0.0147992	0.223265
GSE8835_CD4_VS_CD8_TCELL_CLL_PATIENT_UP	-2.23799	0	2.05427e-05	-1.39224	0.00514933	0.223236
MORI_PRE_BI_LYMPHOCYTE_DN	-2.42322	0	0	-1.39212	0.0295455	0.223403
GO_REGULATION_OF_CYTOKINE_SECRETION	-2.34632	0	4.09671e-06	-1.39202	0.0136268	0.223513
GSE27291_6H_VS_7D_STIM_GAMMADELTA_TCELL_DN	-1.01311	0.417822	0.628964	-1.39195	0.0062435	0.223561
GO_LINOLEIC_ACID_METABOLIC_PROCESS	-0.847046	0.679592	0.941202	-1.3918	0.072973	0.223784
GO_MAMMARY_GLAND_MORPHOGENESIS	1.59428	0.00974659	0.152401	-1.39177	0.0596107	0.223728
GO_ORGAN_REGENERATION	-1.2323	0.119691	0.278625	-1.39174	0.0166113	0.223679
GSE11961_MEMORY_BCELL_DAY7_VS_PLASMA_CELL_DAY7_UP	-1.35181	0.0218688	0.16982	-1.3916	0.0072314	0.223863
VECCHI_GASTRIC_CANCER_ADVANCED_VS_EARLY_DN	-1.33193	0.0342052	0.185809	-1.39151	0.0207197	0.223946
GSE25085_FETAL_BM_VS_ADULT_BM_SP4_THYMIC_IMPLANT_DN	-1.56511	0	0.0594285	-1.39146	0.00823045	0.223937
MYLLYKANGAS_AMPLIFICATION_HOT_SPOT_7	-0.669058	0.849785	1	-1.39096	0.0630499	0.224927
GSE360_CTRL_VS_L_DONOVANI_DC_DN	-1.21898	0.0960334	0.293493	-1.3909	0.00617284	0.224946
GO_ADENYLYLTRANSFERASE_ACTIVITY	-1.82049	0.00205339	0.0100605	-1.3908	0.0586735	0.225063
CHICAS_RB1_TARGETS_CONFLUENT	-1.40347	0	0.133673	-1.39076	0	0.225042
WANG_BARRETTS_ESOPHAGUS_AND_ESOPHAGUS_CANCER_DN	-1.28864	0.111111	0.222146	-1.39056	0.0730198	0.225354
GO_ANTIGEN_PROCESSING_AND_PRESENTATION_OF_ENDOGENOUS_PEPTIDE_ANTIGEN	-1.34378	0.143737	0.176469	-1.39054	0.0646109	0.225287
GSE5589_IL6_KO_VS_IL10_KO_LPS_STIM_MACROPHAGE_180MIN_DN	-1.31595	0.0333333	0.198828	-1.39046	0.00514403	0.225347
GO_REGULATION_OF_REACTIVE_OXYGEN_SPECIES_BIOSYNTHETIC_PROCESS	-1.21308	0.15275	0.300602	-1.39042	0.0396376	0.225328
WEBER_METHYLATED_HCP_IN_FIBROBLAST_UP	1.22086	0.231343	0.49874	-1.39037	0.0510511	0.225305
GSE43863_NAIVE_VS_TH1_EFF_CD4_TCELL_D6_LCMV_DN	-1.49826	0.0198413	0.0852258	-1.39029	0.0159744	0.225341
MODULE_141	1.21508	0.230769	0.505281	-1.39017	0.0775862	0.225487
GSE22886_NAIVE_TCELL_VS_NEUTROPHIL_DN	-1.9777	0	0.00193646	-1.3901	0.0104275	0.225542
GO_MULTICELLULAR_ORGANISMAL_HOMEOSTASIS	-1.23067	0.0575397	0.280232	-1.39008	0.00204918	0.22547
PETROVA_ENDOTHELIUM_LYMPHATIC_VS_BLOOD_DN	-1.2094	0.0998043	0.304639	-1.38993	0.0189673	0.225683
ZHONG_RESPONSE_TO_AZACITIDINE_AND_TSA_UP	-1.10666	0.228175	0.451402	-1.38992	0.0102987	0.22559
GO_PASSIVE_TRANSMEMBRANE_TRANSPORTER_ACTIVITY	-1.09777	0.180527	0.466535	-1.38965	0	0.226088
GSE32164_RESTING_DIFFERENTIATED_VS_ALTERNATIVELY_ACT_M2_MACROPHAGE_DN	-2.31565	0	7.52401e-06	-1.38964	0.00411523	0.225975
GSE32164_RESTING_DIFFERENTIATED_VS_CMYC_INHIBITED_MACROPHAGE_UP	-1.44719	0.00404858	0.108921	-1.38956	0.00309917	0.226036
PID_CD8_TCR_PATHWAY	-2.4482	0	0	-1.3892	0.0368664	0.226683
MIKKELSEN_ES_LCP_WITH_H3K4ME3	-1.52714	0.00198413	0.0730622	-1.38919	0.0108342	0.226575
GSE22886_NAIVE_TCELL_VS_NKCELL_DN	-1.70336	0	0.0255069	-1.38904	0.0061792	0.226787
KEGG_GAP_JUNCTION	1.52171	0.008	0.209391	-1.38883	0.0196721	0.227151
MACAEVA_PBMC_RESPONSE_TO_IR	-1.04548	0.375	0.564825	-1.38877	0.0229508	0.227168
GSE1432_CTRL_VS_IFNG_6H_MICROGLIA_DN	-2.57602	0	0	-1.38869	0.0061792	0.227224
GO_ENDOSOME_LUMEN	-1.56802	0.0208333	0.0586163	-1.38868	0.0536398	0.227134
GNF2_CEBPA	-1.21677	0.164557	0.29594	-1.38849	0.0486111	0.227429
SATO_SILENCED_BY_METHYLATION_IN_PANCREATIC_CANCER_1	-1.39552	0	0.138891	-1.38827	0.00200803	0.227811
GSE37533_PPARG1_FOXP3_VS_PPARG2_FOXP3_TRANSDUCED_CD4_TCELL_PIOGLITAZONE_TREATED_DN	-2.43465	0	0	-1.38819	0.0113169	0.227862
SCHUETZ_BREAST_CANCER_DUCTAL_INVASIVE_UP	-1.92069	0	0.00377282	-1.38815	0.00303337	0.227834
CROMER_TUMORIGENESIS_UP	1.75724	0.0019685	0.064593	-1.38814	0.0507328	0.227746
HADDAD_T_LYMPHOCYTE_AND_NK_PROGENITOR_DN	-1.71942	0.00606061	0.0228121	-1.38809	0.0430351	0.227721
GO_ION_HOMEOSTASIS	-1.50364	0	0.0828158	-1.38803	0.001	0.227744
GSE27670_BLIMP1_VS_LMP1_TRANSDUCED_GC_BCELL_UP	-2.06659	0	0.000521784	-1.38799	0.00720165	0.227728
GO_PHOSPHATIDYLINOSITOL_KINASE_ACTIVITY	0.912749	0.629699	0.989669	-1.38796	0.0351942	0.227676
HANN_RESISTANCE_TO_BCL2_INHIBITOR_DN	1.35578	0.0821643	0.363258	-1.38788	0.0576923	0.227742
BOWIE_RESPONSE_TO_TAMOXIFEN	-2.27211	0	9.71032e-06	-1.38779	0.072	0.227814
VALK_AML_CLUSTER_10	1.57256	0.0261044	0.167261	-1.38767	0.0572473	0.227969
GSE22025_UNTREATED_VS_PROGESTERONE_TREATED_CD4_TCELL_UP	-1.3319	0.017341	0.185806	-1.38744	0.00726895	0.228338
GO_PHOSPHATE_ION_BINDING	-1.6108	0.0179283	0.0459553	-1.38734	0.0733813	0.228457
GO_CELLULAR_RESPONSE_TO_CYTOKINE_STIMULUS	-2.03377	0	0.00087781	-1.38731	0	0.228394
KEGG_PPAR_SIGNALING_PATHWAY	-0.875731	0.713987	0.903018	-1.38724	0.0416667	0.228435
GO_CYTOKINE_ACTIVITY	-1.75846	0	0.0169473	-1.38714	0.0135558	0.228541
GO_ETHANOLAMINE_CONTAINING_COMPOUND_METABOLIC_PROCESS	-1.53668	0.0101626	0.0694323	-1.38699	0.0328587	0.228748
GO_POSITIVE_REGULATION_OF_MUSCLE_CELL_APOPTOTIC_PROCESS	-1.19195	0.252101	0.327102	-1.38686	0.0698006	0.228911
GSE22589_SIV_VS_HIV_AND_SIV_INFECTED_DC_UP	-1.70205	0	0.0257118	-1.38679	0.0112936	0.228955
FRASOR_TAMOXIFEN_RESPONSE_UP	-1.14907	0.24359	0.387454	-1.38663	0.0512821	0.229157
BRCA1_DN.V1_DN	-1.27726	0.060241	0.232132	-1.38645	0.0137712	0.22944
ENGELMANN_CANCER_PROGENITORS_DN	-1.28055	0.103594	0.228464	-1.38641	0.0425287	0.229428
TORCHIA_TARGETS_OF_EWSR1_FLI1_FUSION_UP	-1.37795	0.00622407	0.15082	-1.38599	0.00201613	0.230251
GSE36826_WT_VS_IL1R_KO_SKIN_STAPH_AUREUS_INF_DN	-1.7041	0	0.0253758	-1.3859	0.00614754	0.230344
GSE17721_POLYIC_VS_GARDIQUIMOD_12H_BMDC_UP	-1.64073	0.00200401	0.0382549	-1.38586	0.0051975	0.230321
SABATES_COLORECTAL_ADENOMA_DN	-1.71914	0	0.0228374	-1.38586	0.00615385	0.230205
GO_NEUROTRANSMITTER_TRANSPORTER_ACTIVITY	-1.35517	0.105368	0.167542	-1.38534	0.0788382	0.231255
GOUYER_TATI_TARGETS_DN	0.734262	0.808664	1	-1.38534	0.0718954	0.231144
GSE360_DC_VS_MAC_T_GONDII_DN	-2.18753	0	6.06524e-05	-1.3853	0.00513347	0.231111
XU_CREBBP_TARGETS_DN	-1.76307	0	0.016339	-1.38521	0.0590406	0.2312
HOXA9_DN.V1_UP	-2.58321	0	0	-1.38494	0.0123203	0.231656
LU_TUMOR_ENDOTHELIAL_MARKERS_DN	1.15261	0.308571	0.597561	-1.38472	0.0555556	0.232029
GO_SENSORY_PERCEPTION_OF_CHEMICAL_STIMULUS	-1.36979	0.00425532	0.156794	-1.38471	0.0672963	0.231933
GO_PHOSPHATIDYLCHOLINE_1_ACYLHYDROLASE_ACTIVITY	-1.15377	0.290076	0.380937	-1.38462	0.0632571	0.231997
GSE21360_NAIVE_VS_PRIMARY_MEMORY_CD8_TCELL_UP	-1.90792	0	0.00435172	-1.3846	0.00518135	0.231932
GSE22886_TH1_VS_TH2_48H_ACT_DN	-1.4008	0.0118812	0.135444	-1.38459	0.0113872	0.23184
VALK_AML_CLUSTER_4	0.809518	0.779221	1	-1.38455	0.0734177	0.2318
GO_POSITIVE_REGULATION_OF_BLOOD_CIRCULATION	1.4528	0.0250965	0.274296	-1.38448	0.0389321	0.231847
GO_RESPONSE_TO_MURAMYL_DIPEPTIDE	-1.00441	0.438923	0.647988	-1.38435	0.086351	0.232023
GSE1566_WT_VS_EZH2_KO_LN_TCELL_UP	-1.39122	0.0137795	0.141984	-1.38433	0.0116034	0.231938
TURASHVILI_BREAST_DUCTAL_CARCINOMA_VS_DUCTAL_NORMAL_DN	-0.969045	0.536842	0.725334	-1.38432	0.0158898	0.231844
GO_RESPONSE_TO_ACID_CHEMICAL	-1.29137	0.016	0.219769	-1.38414	0.00100908	0.232134
WATANABE_ULCERATIVE_COLITIS_WITH_CANCER_DN	-1.82028	0.0021645	0.0100739	-1.3841	0.079235	0.232102
GO_GLIAL_CELL_MIGRATION	-1.45075	0.045738	0.107222	-1.38408	0.0538173	0.232031
HEN1_02	1.18794	0.0823045	0.549143	-1.38394	0.00726141	0.23222
GO_POSITIVE_REGULATION_OF_CAMP_METABOLIC_PROCESS	1.00752	0.428283	0.826261	-1.38365	0.0284775	0.232759
GO_AGING	-1.01898	0.401198	0.617251	-1.38351	0.0010101	0.232983
AMUNDSON_DNA_DAMAGE_RESPONSE_TP53	-0.865684	0.672199	0.917355	-1.38348	0.0929919	0.232924
ZWANG_CLASS_2_TRANSIENTLY_INDUCED_BY_EGF	-1.18656	0.172131	0.334937	-1.38326	0.059453	0.233304
GSE40274_IRF4_VS_FOXP3_AND_IRF4_TRANSDUCED_ACTIVATED_CD4_TCELL_DN	-1.13814	0.229814	0.402879	-1.38324	0.0239391	0.233231
GO_PHAGOCYTOSIS	-2.06623	0	0.000525854	-1.38313	0.013347	0.233339
NABA_MATRISOME	-1.56534	0	0.059368	-1.3831	0	0.233285
GO_O_ACYLTRANSFERASE_ACTIVITY	-0.709619	0.933468	1	-1.38287	0.0509849	0.233713
GSE17974_0H_VS_24H_IN_VITRO_ACT_CD4_TCELL_UP	-1.71523	0	0.0234816	-1.38281	0.0189873	0.233716
MODULE_291	-1.87656	0	0.0059757	-1.38278	0.0465658	0.233671
DIERICK_SEROTONIN_FUNCTION_GENES	-1.42666	0.100823	0.120004	-1.38261	0.060559	0.233951
GO_CDP_DIACYLGLYCEROL_METABOLIC_PROCESS	-0.815896	0.706383	0.971423	-1.38244	0.0700132	0.234215
GO_REGULATION_OF_CATION_TRANSMEMBRANE_TRANSPORT	-1.28613	0.0349515	0.224044	-1.38206	0.00412797	0.23496
HOSHIDA_LIVER_CANCER_SUBCLASS_S1	-1.64639	0	0.0369906	-1.38196	0.00407332	0.235052
GO_SINGLE_ORGANISM_CELL_ADHESION	-2.05417	0	0.000635803	-1.3818	0	0.235306
GSE23568_CTRL_TRANSDUCED_VS_WT_CD8_TCELL_UP	-1.79189	0	0.0128735	-1.38179	0.00912779	0.235215
GSE7460_FOXP3_MUT_VS_WT_ACT_WITH_TGFB_TCONV_DN	-1.70933	0	0.0245333	-1.38168	0.00819672	0.235361
WOTTON_RUNX_TARGETS_UP	-1.69985	0.00628931	0.0260744	-1.38165	0.0848564	0.235297
GO_PERIPHERAL_NERVOUS_SYSTEM_DEVELOPMENT	-1.07245	0.342	0.511029	-1.38155	0.0476191	0.2354
GO_EXTERNAL_ENCAPSULATING_STRUCTURE	-1.35901	0.122	0.164676	-1.38121	0.0788321	0.236052
IRF2_01	-1.35333	0.044316	0.168503	-1.38114	0.0194384	0.236083
AMBROSINI_FLAVOPIRIDOL_TREATMENT_TP53	-1.08069	0.295858	0.495328	-1.38104	0.0222458	0.236188
GO_FIBRONECTIN_BINDING	-0.987169	0.48	0.685921	-1.38101	0.0671642	0.236137
FARMER_BREAST_CANCER_CLUSTER_3	1.45538	0.0737864	0.271486	-1.38098	0.0883534	0.236081
GO_REFLEX	1.58079	0.0299401	0.159896	-1.38091	0.0847682	0.236138
GO_CELL_SURFACE	-1.98531	0	0.00176297	-1.38075	0	0.236386
GO_GLYCEROPHOSPHOLIPID_CATABOLIC_PROCESS	-0.983744	0.473251	0.694001	-1.38061	0.0654843	0.236596
RODRIGUES_THYROID_CARCINOMA_DN	1.14828	0.199609	0.599661	-1.38054	0.031355	0.236618
GO_PRE_AUTOPHAGOSOMAL_STRUCTURE	-1.41456	0.0440529	0.126951	-1.3805	0.0665796	0.236591
GSE3039_NKT_CELL_VS_B1_BCELL_UP	-1.62738	0	0.0413785	-1.38037	0.00712831	0.236746
GSE5589_WT_VS_IL10_KO_LPS_STIM_MACROPHAGE_180MIN_DN	-1.18836	0.110442	0.332259	-1.38034	0.0147524	0.236687
GSE360_CTRL_VS_T_GONDII_DC_DN	-1.15229	0.136179	0.382949	-1.38027	0.0124095	0.236725
HINATA_NFKB_TARGETS_FIBROBLAST_UP	-1.26367	0.0733198	0.244223	-1.3802	0.0460674	0.236768
GSE17974_CTRL_VS_ACT_IL4_AND_ANTI_IL12_48H_CD4_TCELL_UP	-1.66031	0	0.0338896	-1.38019	0.016444	0.236667
GO_ACTIN_BASED_CELL_PROJECTION	-1.13275	0.162055	0.410571	-1.38017	0.00517063	0.236593
WNT_UP.V1_UP	-1.44461	0.00795229	0.110215	-1.38016	0.00627615	0.236498
GSE15624_3H_VS_6H_HALOFUGINONE_TREATED_CD4_TCELL_UP	-1.89243	0	0.00513467	-1.38012	0.0133607	0.236478
CORDENONSI_YAP_CONSERVED_SIGNATURE	1.23847	0.125	0.478124	-1.38009	0.0409836	0.236423
GO_REGULATION_OF_RHODOPSIN_MEDIATED_SIGNALING_PATHWAY	-0.799741	0.796443	0.984679	-1.37976	0.0530401	0.237058
BUDHU_LIVER_CANCER_METASTASIS_UP	-1.29093	0.174897	0.220057	-1.37969	0.0724852	0.237104
GSE22229_UNTREATED_VS_IMMUNOSUPP_THERAPY_RENAL_TRANSPLANT_PATIENT_PBMC_DN	-0.963129	0.554639	0.737979	-1.37955	0.00927835	0.23731
HAN_JNK_SINGALING_UP	-1.18301	0.230769	0.339849	-1.37954	0.0762813	0.237208
CHR1P13	-1.04616	0.361963	0.563539	-1.37949	0.0318681	0.237207
[truncated: 15,607 more rows]
